# Supplementary material
Source: publisher site journal article supplement (https://www.dovepress.com/article/232526)
Supplement: Supplementary file 1 [file get_supplementary_file.php]

Table S1. Lists of differentially expressed long noncoding RNAs, protein-coding RNAs, microRNAs and enriched terms identified in the GO and KEGG enrichment analysis.

List of DE LncRNAs (LongTKD vs. NC)

|                 | symbol      | logFC | PValue   | qvalue   |
|-----------------|-------------|-------|----------|----------|
| ENSG00000260604 | AL590004.4  | -2.55 | 1.19E-29 | 2.35E-26 |
| ENSG00000272027 | AC073218.2  | -1.84 | 2.66E-11 | 4.63E-09 |
| ENSG00000231652 | AL590428.1  | 1.81  | 3.54E-11 | 5.77E-09 |
| ENSG00000223414 | LINC00473   | 1.25  | 3.98E-08 | 3.24E-06 |
| ENSG00000227115 | LINC01630   | -2.23 | 4.28E-08 | 3.45E-06 |
| ENSG00000233143 | DIRC3-AS1   | -7.13 | 5.51E-08 | 4.26E-06 |
| ENSG00000257167 | TMPO-AS1    | -0.88 | 8.37E-08 | 6.11E-06 |
| ENSG00000236283 | AC019197.1  | 0.90  | 2.33E-07 | 1.48E-05 |
| ENSG00000261040 | WFDC21P     | 1.15  | 3.20E-07 | 1.95E-05 |
| ENSG00000228262 | LINC01320   | -1.81 | 3.65E-07 | 2.15E-05 |
| ENSG00000233517 | AC005162.2  | -1.41 | 3.89E-07 | 2.23E-05 |
| ENSG00000255471 | AP001528.2  | -1.24 | 6.99E-07 | 3.69E-05 |
| ENSG00000275491 | LINC01730   | 1.05  | 1.04E-06 | 5.07E-05 |
| ENSG00000259676 | AC103982.1  | -1.34 | 1.44E-06 | 6.63E-05 |
| ENSG00000251562 | MALAT1      | 0.69  | 1.98E-06 | 8.80E-05 |
| ENSG00000268621 | IGFL2-AS1   | 2.53  | 4.15E-06 | 1.68E-04 |
| ENSG00000130600 | H19         | 2.12  | 4.17E-06 | 1.68E-04 |
| ENSG00000272568 | AC005162.3  | -1.24 | 4.18E-06 | 1.68E-04 |
| ENSG00000246228 | CASC8       | -1.89 | 4.42E-06 | 1.76E-04 |
| ENSG00000270661 | Z99289.2    | -1.30 | 5.46E-06 | 2.11E-04 |
| ENSG00000242759 | LINC00882   | -0.91 | 5.70E-06 | 2.19E-04 |
| ENSG00000177822 | AC098864.1  | -0.96 | 6.43E-06 | 2.45E-04 |
| ENSG00000226571 | AL158850.1  | -1.55 | 6.79E-06 | 2.57E-04 |
| ENSG00000259439 | LINC01833   | -1.17 | 1.21E-05 | 4.06E-04 |
| ENSG00000163597 | SNHG16      | 0.59  | 1.31E-05 | 4.33E-04 |
| ENSG00000275185 | AC130324.3  | -1.02 | 1.51E-05 | 4.82E-04 |
| ENSG00000274307 | AC023449.2  | -1.11 | 1.53E-05 | 4.84E-04 |
| ENSG00000257060 | AC091078.1  | -1.59 | 1.59E-05 | 4.99E-04 |
| ENSG00000225733 | FGD5-AS1    | -0.62 | 1.77E-05 | 5.46E-04 |
| ENSG00000226149 | AL356124.1  | 1.27  | 1.90E-05 | 5.79E-04 |
| ENSG00000249279 | LINC02057   | -1.85 | 2.41E-05 | 7.10E-04 |
| ENSG00000267383 | AC011447.3  | -0.67 | 4.49E-05 | 1.20E-03 |
| ENSG00000258725 | PRC1-AS1    | 1.18  | 4.92E-05 | 1.29E-03 |
| ENSG00000253642 | AF279873.3  | -2.44 | 4.95E-05 | 1.29E-03 |
| ENSG00000246985 | SOCS2-AS1   | 0.86  | 6.12E-05 | 1.54E-03 |
| ENSG00000250072 | AC091940.1  | -1.02 | 6.40E-05 | 1.60E-03 |
| ENSG00000267750 | RUNDC3A-AS1 | 0.90  | 8.03E-05 | 1.92E-03 |
| ENSG00000270504 | AL391422.3  | -0.87 | 8.75E-05 | 2.07E-03 |
| ENSG00000244041 | LINC01011   | 0.99  | 8.88E-05 | 2.10E-03 |
| ENSG00000196295 | AC005154.1  | 0.44  | 9.07E-05 | 2.13E-03 |
| ENSG00000232110 | AL353751.1  | -1.53 | 9.47E-05 | 2.21E-03 |
| ENSG00000276997 | AL513314.2  | 1.60  | 1.24E-04 | 2.74E-03 |
| ENSG00000258123 | LINC02444   | -1.93 | 1.27E-04 | 2.80E-03 |
| ENSG00000228421 | AC005013.1  | -1.15 | 1.30E-04 | 2.85E-03 |
| ENSG00000215039 | CD27-AS1    | 0.81  | 1.47E-04 | 3.16E-03 |
| ENSG00000225377 | NRSN2-AS1   | 0.76  | 2.24E-04 | 4.42E-03 |
| ENSG00000254626 | AP003100.1  | -1.02 | 2.48E-04 | 4.80E-03 |
| ENSG00000222041 | CYTOR       | -0.55 | 2.62E-04 | 4.99E-03 |
| ENSG00000232973 | CYP1B1-AS1  | 0.75  | 2.74E-04 | 5.16E-03 |
| ENSG00000246273 | SBF2-AS1    | -0.81 | 3.37E-04 | 6.07E-03 |
| ENSG00000255284 | AP006621.3  | 0.97  | 3.70E-04 | 6.58E-03 |
| ENSG00000251350 | LINC02475   | -0.97 | 4.66E-04 | 7.74E-03 |
| ENSG00000235139 | AC003984.1  | 1.13  | 4.91E-04 | 8.04E-03 |
| ENSG00000226674 | TEX41       | 0.86  | 5.72E-04 | 9.10E-03 |
| ENSG00000248491 | AC093772.1  | -1.85 | 6.12E-04 | 9.64E-03 |
| ENSG00000257242 | LINC01619   | 1.56  | 6.42E-04 | 1.00E-02 |
| ENSG00000235590 | GNAS-AS1    | -0.80 | 6.65E-04 | 1.02E-02 |
| ENSG00000228878 | SEPT7-AS1   | 1.05  | 8.93E-04 | 1.28E-02 |
| ENSG00000227456 | LINC00310   | 1.22  | 9.28E-04 | 1.32E-02 |
| ENSG00000245532 | NEAT1       | 0.69  | 9.75E-04 | 1.38E-02 |

|                 |             |       |          |          |
|-----------------|-------------|-------|----------|----------|
| ENSG00000233008 | LINC01725   | 0.75  | 1.04E-03 | 1.46E-02 |
| ENSG00000273350 | AC004832.5  | 1.28  | 1.06E-03 | 1.48E-02 |
| ENSG00000276672 | AL161891.1  | -0.68 | 1.32E-03 | 1.76E-02 |
| ENSG00000228649 | SNHG26      | -0.98 | 1.35E-03 | 1.79E-02 |
| ENSG00000248309 | MEF2C-AS1   | 1.04  | 1.38E-03 | 1.82E-02 |
| ENSG00000278709 | NKILA       | -1.32 | 1.39E-03 | 1.82E-02 |
| ENSG00000224606 | TGFA-IT1    | -1.14 | 1.43E-03 | 1.87E-02 |
| ENSG00000274414 | AL121772.1  | -1.21 | 1.63E-03 | 2.06E-02 |
| ENSG00000203706 | SERTAD4-AS1 | 1.40  | 1.64E-03 | 2.06E-02 |
| ENSG00000245614 | DDX11-AS1   | -0.74 | 1.65E-03 | 2.08E-02 |
| ENSG00000225218 | AP001628.1  | 1.42  | 1.69E-03 | 2.11E-02 |
| ENSG00000226758 | DISC1-IT1   | 0.98  | 1.81E-03 | 2.22E-02 |
| ENSG00000279066 | AC132938.5  | 1.24  | 1.86E-03 | 2.28E-02 |
| ENSG00000274976 | AC087588.2  | -1.75 | 1.91E-03 | 2.33E-02 |
| ENSG00000236242 | MYO16-AS1   | 0.96  | 1.97E-03 | 2.39E-02 |
| ENSG00000271911 | AL357054.3  | 0.91  | 2.00E-03 | 2.41E-02 |
| ENSG00000262061 | AC129507.1  | -0.98 | 2.02E-03 | 2.43E-02 |
| ENSG00000235192 | AC009495.3  | -1.03 | 2.05E-03 | 2.46E-02 |
| ENSG00000269821 | KCNQ1OT1    | -0.52 | 2.10E-03 | 2.51E-02 |
| ENSG00000246528 | AC079089.1  | -1.17 | 2.11E-03 | 2.52E-02 |
| ENSG00000261801 | LOXL1-AS1   | 0.61  | 2.25E-03 | 2.65E-02 |
| ENSG00000189223 | PAX8-AS1    | 0.79  | 2.29E-03 | 2.69E-02 |
| ENSG00000263603 | AC127024.2  | 0.80  | 2.47E-03 | 2.85E-02 |
| ENSG00000240666 | MME-AS1     | -1.82 | 2.50E-03 | 2.88E-02 |
| ENSG00000262454 | MIR193BHG   | 0.61  | 2.52E-03 | 2.90E-02 |
| ENSG00000196668 | LINC00173   | 0.88  | 2.55E-03 | 2.92E-02 |
| ENSG00000235545 | AC103923.1  | -1.38 | 2.58E-03 | 2.95E-02 |
| ENSG00000277007 | AC096642.1  | 0.69  | 2.79E-03 | 3.13E-02 |
| ENSG00000257337 | AC068888.1  | 0.60  | 3.05E-03 | 3.36E-02 |
| ENSG00000231535 | LINC00278   | 0.76  | 3.27E-03 | 3.53E-02 |
| ENSG00000269998 | LINC01930   | 0.98  | 3.28E-03 | 3.53E-02 |
| ENSG00000163009 | C2orf48     | -1.05 | 3.40E-03 | 3.63E-02 |
| ENSG00000246090 | AP002026.1  | -0.68 | 3.53E-03 | 3.74E-02 |
| ENSG00000233695 | GAS6-AS1    | 0.80  | 3.55E-03 | 3.75E-02 |
| ENSG00000238033 | AC002480.4  | -1.07 | 3.57E-03 | 3.77E-02 |
| ENSG00000271727 | AL357054.2  | 0.98  | 3.67E-03 | 3.86E-02 |
| ENSG00000272142 | AL359643.3  | 0.53  | 3.87E-03 | 4.01E-02 |
| ENSG00000261083 | LINC02516   | 1.08  | 4.14E-03 | 4.22E-02 |
| ENSG00000270049 | AC009061.2  | 0.91  | 4.15E-03 | 4.23E-02 |
| ENSG00000251179 | TMEM92-AS1  | 1.26  | 4.21E-03 | 4.27E-02 |
| ENSG00000227598 | Z94721.1    | -1.05 | 4.22E-03 | 4.27E-02 |
| ENSG00000157306 | ZFH2-AS1    | 0.75  | 4.41E-03 | 4.41E-02 |
| ENSG00000231918 | AC007402.1  | -1.07 | 4.49E-03 | 4.47E-02 |
| ENSG00000260563 | AC132872.1  | 0.76  | 4.50E-03 | 4.47E-02 |
| ENSG00000225206 | MIR137HG    | 0.50  | 4.50E-03 | 4.47E-02 |
| ENSG00000253372 | AC016405.1  | -1.26 | 4.58E-03 | 4.54E-02 |
| ENSG00000235026 | DPP10-AS1   | -1.59 | 4.65E-03 | 4.59E-02 |
| ENSG00000262528 | AL022341.2  | 1.46  | 4.70E-03 | 4.63E-02 |
| ENSG00000272622 | AC010735.2  | -0.60 | 4.73E-03 | 4.65E-02 |
| ENSG00000234840 | LINC01239   | 0.55  | 4.80E-03 | 4.70E-02 |
| ENSG00000261971 | MMP25-AS1   | 0.60  | 4.88E-03 | 4.76E-02 |
| ENSG00000246640 | PICART1     | 1.62  | 4.99E-03 | 4.84E-02 |
| ENSG00000277587 | AC008759.3  | -2.44 | 4.99E-03 | 4.84E-02 |
| ENSG00000267263 | AC111170.2  | 0.72  | 5.18E-03 | 4.96E-02 |
| ENSG00000223764 | AL645608.1  | 0.98  | 5.22E-03 | 4.99E-02 |

List of DE LncRNAs (ShortTKD vs. NC)

|                 | symbol     | logFC | PValue   | qvalue   |
|-----------------|------------|-------|----------|----------|
| ENSG00000260604 | AL590004.4 | -1.55 | 1.77E-15 | 1.15E-12 |
| ENSG00000163597 | SNHG16     | 0.69  | 2.73E-11 | 7.48E-09 |
| ENSG00000259820 | AC083843.2 | -0.77 | 1.18E-05 | 7.40E-04 |
| ENSG00000260912 | AL158206.1 | -1.92 | 8.22E-05 | 3.71E-03 |
| ENSG00000232677 | LINC00665  | 0.42  | 1.52E-04 | 6.09E-03 |
| ENSG00000223960 | AC009948.1 | -0.75 | 1.82E-04 | 7.04E-03 |
| ENSG00000231298 | LINC00704  | -0.75 | 3.35E-04 | 1.18E-02 |
| ENSG00000246695 | RASSF8-AS1 | -0.49 | 4.37E-04 | 1.46E-02 |
| ENSG00000257167 | TMPO-AS1   | -0.54 | 1.13E-03 | 3.08E-02 |
| ENSG00000273373 | AL355488.2 | -0.63 | 1.69E-03 | 4.20E-02 |
| ENSG00000175728 | C11orf44   | -1.21 | 1.72E-03 | 4.25E-02 |
| ENSG00000263327 | TAPT1-AS1  | -0.47 | 1.78E-03 | 4.35E-02 |
| ENSG00000256124 | LINC01152  | 0.63  | 1.90E-03 | 4.60E-02 |
| ENSG00000271888 | AL136162.1 | -1.95 | 1.93E-03 | 4.65E-02 |
| ENSG00000272367 | AC018754.1 | -1.19 | 2.09E-03 | 4.94E-02 |

List of DE LncRNAs (Both Down-regulated)

|                 | symbol     |
|-----------------|------------|
| ENSG00000260604 | AL590004.4 |
| ENSG00000257167 | TMPO-AS1   |

List of DE LncRNA (Both Up-regulated)

symbol

ENSG00000163597 SNHG16

## List of DE pcRNAs (LongTKD vs. NC)

|                 | symbol   | group          | logFC | PValue   | qvalue   |
|-----------------|----------|----------------|-------|----------|----------|
| ENSG00000144959 | NCEH1    | protein_coding | -2.65 | 1.06E-67 | 1.68E-63 |
| ENSG00000153904 | DDAH1    | protein_coding | -2.42 | 5.46E-53 | 4.33E-49 |
| ENSG00000179826 | MRGPRX3  | protein_coding | -2.43 | 1.90E-48 | 1.00E-44 |
| ENSG00000151468 | CCDC3    | protein_coding | -1.66 | 1.56E-38 | 6.18E-35 |
| ENSG00000142149 | HUNK     | protein_coding | -1.69 | 1.17E-33 | 3.71E-30 |
| ENSG00000169429 | CXCL8    | protein_coding | -2.09 | 4.28E-33 | 1.13E-29 |
| ENSG00000128052 | KDR      | protein_coding | -2.17 | 9.54E-33 | 2.16E-29 |
| ENSG00000164458 | T        | protein_coding | -1.51 | 1.33E-27 | 2.34E-24 |
| ENSG00000101350 | KIF3B    | protein_coding | 1.24  | 4.96E-22 | 7.85E-19 |
| ENSG00000123908 | AGO2     | protein_coding | -1.19 | 1.59E-21 | 2.29E-18 |
| ENSG00000124126 | PREX1    | protein_coding | -1.67 | 1.10E-20 | 1.46E-17 |
| ENSG00000157766 | ACAN     | protein_coding | -1.44 | 1.63E-20 | 1.99E-17 |
| ENSG00000235162 | C12orf75 | protein_coding | -1.22 | 6.21E-20 | 7.02E-17 |
| ENSG00000063180 | CA11     | protein_coding | 1.35  | 1.05E-19 | 1.11E-16 |
| ENSG00000064393 | HIPK2    | protein_coding | -1.19 | 4.25E-19 | 4.21E-16 |
| ENSG00000148730 | EIF4EBP2 | protein_coding | -1.05 | 5.07E-19 | 4.72E-16 |
| ENSG00000111859 | NEDD9    | protein_coding | -1.14 | 9.84E-19 | 8.65E-16 |
| ENSG00000140105 | WARS     | protein_coding | 1.34  | 1.90E-18 | 1.59E-15 |
| ENSG00000147853 | AK3      | protein_coding | 1.27  | 2.13E-18 | 1.68E-15 |
| ENSG00000147724 | FAM135B  | protein_coding | -2.12 | 2.80E-18 | 2.11E-15 |
| ENSG00000100196 | KDEL3    | protein_coding | -1.27 | 4.38E-18 | 3.15E-15 |
| ENSG00000125398 | SOX9     | protein_coding | -1.09 | 9.76E-18 | 6.72E-15 |
| ENSG00000178031 | ADAMTSL1 | protein_coding | -1.32 | 1.96E-17 | 1.29E-14 |
| ENSG00000166780 | C16orf45 | protein_coding | 1.05  | 2.85E-17 | 1.80E-14 |
| ENSG00000166881 | NEMP1    | protein_coding | -1.03 | 4.00E-17 | 2.44E-14 |
| ENSG00000117868 | ESYT2    | protein_coding | -1.01 | 5.10E-17 | 2.99E-14 |
| ENSG00000185418 | TARSL2   | protein_coding | -1.13 | 6.62E-17 | 3.74E-14 |
| ENSG00000065911 | MTHFD2   | protein_coding | -1.06 | 6.99E-17 | 3.82E-14 |
| ENSG00000165891 | E2F7     | protein_coding | -1.12 | 9.02E-17 | 4.76E-14 |
| ENSG00000125247 | TMTC4    | protein_coding | -1.17 | 1.14E-16 | 5.81E-14 |
| ENSG00000145335 | SNCA     | protein_coding | 1.37  | 1.22E-16 | 6.04E-14 |
| ENSG00000105855 | ITGB8    | protein_coding | -1.79 | 2.47E-16 | 1.15E-13 |
| ENSG00000163359 | COL6A3   | protein_coding | -1.31 | 2.43E-16 | 1.15E-13 |
| ENSG00000151892 | GFRA1    | protein_coding | -1.18 | 5.25E-16 | 2.38E-13 |
| ENSG00000103723 | AP3B2    | protein_coding | -1.55 | 8.82E-16 | 3.88E-13 |
| ENSG00000164442 | CITED2   | protein_coding | 0.95  | 1.19E-15 | 5.11E-13 |
| ENSG00000099250 | NRP1     | protein_coding | 0.94  | 1.75E-15 | 7.29E-13 |
| ENSG00000153179 | RASSF3   | protein_coding | -1.08 | 2.16E-15 | 8.76E-13 |
| ENSG00000120539 | MASTL    | protein_coding | -1.03 | 3.10E-15 | 1.23E-12 |
| ENSG00000111837 | MAK      | protein_coding | -1.84 | 3.70E-15 | 1.43E-12 |
| ENSG00000156804 | FBXO32   | protein_coding | 1.05  | 5.06E-15 | 1.91E-12 |
| ENSG00000130066 | SAT1     | protein_coding | 1.34  | 7.43E-15 | 2.74E-12 |
| ENSG00000092201 | SUPT16H  | protein_coding | -1.09 | 8.57E-15 | 3.08E-12 |
| ENSG00000127951 | FGL2     | protein_coding | -1.67 | 9.18E-15 | 3.23E-12 |
| ENSG00000049323 | LTBP1    | protein_coding | -1.03 | 1.08E-14 | 3.73E-12 |
| ENSG00000152092 | ASTN1    | protein_coding | -2.19 | 1.77E-14 | 5.82E-12 |
| ENSG00000162645 | GBP2     | protein_coding | 1.30  | 1.73E-14 | 5.82E-12 |
| ENSG00000070614 | NDST1    | protein_coding | 1.59  | 2.06E-14 | 6.52E-12 |
| ENSG00000143641 | GALNT2   | protein_coding | 1.01  | 2.04E-14 | 6.52E-12 |
| ENSG00000143476 | DTL      | protein_coding | -0.89 | 3.95E-14 | 1.23E-11 |
| ENSG00000143878 | RHOB     | protein_coding | -1.73 | 4.57E-14 | 1.39E-11 |
| ENSG00000198682 | PAPSS2   | protein_coding | -1.08 | 5.32E-14 | 1.59E-11 |
| ENSG00000115339 | GALNT3   | protein_coding | -1.53 | 7.40E-14 | 2.17E-11 |
| ENSG00000185896 | LAMP1    | protein_coding | 0.85  | 1.25E-13 | 3.60E-11 |
| ENSG00000137571 | SLCO5A1  | protein_coding | -1.64 | 1.41E-13 | 3.98E-11 |
| ENSG00000178695 | KCTD12   | protein_coding | 1.33  | 1.76E-13 | 4.87E-11 |
| ENSG00000001461 | NIPAL3   | protein_coding | 1.11  | 2.72E-13 | 7.29E-11 |
| ENSG00000119938 | PPP1R3C  | protein_coding | -1.20 | 3.32E-13 | 8.75E-11 |
| ENSG00000123213 | NLN      | protein_coding | 1.16  | 3.37E-13 | 8.75E-11 |
| ENSG00000008513 | ST3GAL1  | protein_coding | -1.23 | 3.94E-13 | 1.01E-10 |
| ENSG00000137393 | RNF144B  | protein_coding | -1.62 | 5.20E-13 | 1.31E-10 |
| ENSG00000101290 | CDS2     | protein_coding | -1.28 | 6.03E-13 | 1.49E-10 |
| ENSG00000158516 | CPA2     | protein_coding | -0.99 | 7.24E-13 | 1.76E-10 |

|                  |          |                |       |          |          |
|------------------|----------|----------------|-------|----------|----------|
| ENSG00000163106  | HPGDS    | protein_coding | -1.38 | 7.95E-13 | 1.91E-10 |
| ENSG00000111696  | NT5DC3   | protein_coding | -0.79 | 1.86E-12 | 4.40E-10 |
| ENSG00000171451  | DSEL     | protein_coding | 1.65  | 2.77E-12 | 6.45E-10 |
| ENSG00000198729  | PPP1R14C | protein_coding | -1.33 | 2.83E-12 | 6.50E-10 |
| ENSG00000114812  | VIPR1    | protein_coding | 1.37  | 3.09E-12 | 6.98E-10 |
| ENSG00000003989  | SLC7A2   | protein_coding | -1.46 | 3.42E-12 | 7.63E-10 |
| ENSG00000106617  | PRKAG2   | protein_coding | -1.10 | 3.80E-12 | 8.37E-10 |
| ENSG00000120656  | TAF12    | protein_coding | 1.08  | 4.31E-12 | 9.21E-10 |
| ENSG00000174469  | CNTNAP2  | protein_coding | -1.82 | 4.25E-12 | 9.21E-10 |
| ENSG00000101911  | PRPS2    | protein_coding | 1.36  | 4.82E-12 | 1.02E-09 |
| ENSG00000167601  | AXL      | protein_coding | 1.29  | 5.03E-12 | 1.05E-09 |
| ENSG00000179542  | SLITRK4  | protein_coding | -1.27 | 5.26E-12 | 1.08E-09 |
| ENSG00000267041  | ZNF850   | protein_coding | -1.14 | 6.13E-12 | 1.24E-09 |
| ENSG00000051341  | POLQ     | protein_coding | -0.94 | 6.29E-12 | 1.26E-09 |
| ENSG00000007174  | DNAH9    | protein_coding | -1.12 | 6.49E-12 | 1.29E-09 |
| ENSG00000260027  | HOXB7    | protein_coding | -1.31 | 6.89E-12 | 1.35E-09 |
| ENSG00000163739  | CXCL1    | protein_coding | -1.21 | 1.11E-11 | 2.14E-09 |
| ENSG00000168329  | CX3CR1   | protein_coding | -1.07 | 1.18E-11 | 2.25E-09 |
| ENSG00000082458  | DLG3     | protein_coding | -0.88 | 1.44E-11 | 2.72E-09 |
| ENSG00000128595  | CALU     | protein_coding | -0.97 | 1.78E-11 | 3.31E-09 |
| ENSG00000163235  | TGFA     | protein_coding | -0.93 | 1.81E-11 | 3.33E-09 |
| ENSG00000149547  | EI24     | protein_coding | -0.96 | 1.86E-11 | 3.36E-09 |
| ENSG00000165704  | HPRT1    | protein_coding | 1.42  | 1.87E-11 | 3.36E-09 |
| ENSG00000148572  | NRBF2    | protein_coding | -1.41 | 1.93E-11 | 3.43E-09 |
| ENSG00000139318  | DUSP6    | protein_coding | -1.45 | 2.10E-11 | 3.70E-09 |
| ENSG00000145808  | ADAMTS19 | protein_coding | -1.88 | 2.88E-11 | 4.95E-09 |
| ENSG00000168079  | SCARA5   | protein_coding | -0.95 | 3.05E-11 | 5.19E-09 |
| ENSG00000144331  | ZNF385B  | protein_coding | -0.99 | 3.12E-11 | 5.25E-09 |
| ENSG00000213390  | ARHGAP19 | protein_coding | -1.10 | 3.20E-11 | 5.34E-09 |
| ENSG00000075790  | BCAP29   | protein_coding | -1.14 | 3.38E-11 | 5.58E-09 |
| ENSG00000183688  | RFLNB    | protein_coding | -1.07 | 4.61E-11 | 7.45E-09 |
| ENSG00000147416  | ATP6V1B2 | protein_coding | -1.06 | 4.73E-11 | 7.56E-09 |
| ENSG00000069702  | TGFBR3   | protein_coding | -1.04 | 4.79E-11 | 7.58E-09 |
| ENSG00000057657  | PRDM1    | protein_coding | 1.15  | 5.12E-11 | 8.03E-09 |
| ENSG00000100346  | CACNA1I  | protein_coding | -1.69 | 5.43E-11 | 8.43E-09 |
| ENSG00000196937  | FAM3C    | protein_coding | -1.28 | 5.89E-11 | 9.05E-09 |
| ENSG00000112182  | BACH2    | protein_coding | -1.54 | 7.24E-11 | 1.10E-08 |
| ENSG00000100554  | ATP6V1D  | protein_coding | 0.91  | 7.77E-11 | 1.16E-08 |
| ENSG00000137440  | FGFBP1   | protein_coding | -1.22 | 7.75E-11 | 1.16E-08 |
| ENSG00000182253  | SYNM     | protein_coding | 0.92  | 8.27E-11 | 1.22E-08 |
| ENSG00000174804  | FZD4     | protein_coding | -1.32 | 8.76E-11 | 1.28E-08 |
| ENSG00000152049  | KCNE4    | protein_coding | 1.77  | 9.41E-11 | 1.37E-08 |
| ENSG00000048471  | SNX29    | protein_coding | 0.83  | 1.01E-10 | 1.44E-08 |
| ENSG00000142731  | PLK4     | protein_coding | -1.01 | 1.00E-10 | 1.44E-08 |
| ENSG000000073756 | PTGS2    | protein_coding | -1.46 | 1.31E-10 | 1.85E-08 |
| ENSG00000172296  | SPTLC3   | protein_coding | -1.37 | 1.34E-10 | 1.88E-08 |
| ENSG00000108854  | SMURF2   | protein_coding | -1.20 | 1.44E-10 | 2.00E-08 |
| ENSG00000088836  | SLC4A11  | protein_coding | -1.31 | 2.12E-10 | 2.92E-08 |
| ENSG00000176597  | B3GNT5   | protein_coding | -1.15 | 2.26E-10 | 3.08E-08 |
| ENSG00000168209  | DDIT4    | protein_coding | 1.53  | 3.11E-10 | 4.21E-08 |
| ENSG00000068366  | ACSL4    | protein_coding | 1.09  | 3.39E-10 | 4.50E-08 |
| ENSG00000076356  | PLXNA2   | protein_coding | -1.14 | 3.38E-10 | 4.50E-08 |
| ENSG00000154928  | EPHB1    | protein_coding | -1.70 | 3.45E-10 | 4.55E-08 |
| ENSG00000109084  | TMEM97   | protein_coding | -0.98 | 3.82E-10 | 4.99E-08 |
| ENSG00000060982  | BCAT1    | protein_coding | -1.46 | 4.04E-10 | 5.25E-08 |
| ENSG00000171476  | HOPX     | protein_coding | -1.18 | 4.12E-10 | 5.30E-08 |
| ENSG00000006125  | AP2B1    | protein_coding | 0.71  | 4.85E-10 | 6.19E-08 |
| ENSG00000184408  | KCND2    | protein_coding | -1.24 | 5.33E-10 | 6.74E-08 |
| ENSG00000124762  | CDKN1A   | protein_coding | 1.71  | 6.05E-10 | 7.60E-08 |
| ENSG00000134046  | MBD2     | protein_coding | 1.03  | 6.47E-10 | 8.07E-08 |
| ENSG00000094916  | CBX5     | protein_coding | -0.80 | 6.75E-10 | 8.35E-08 |
| ENSG00000166845  | C18orf54 | protein_coding | -0.98 | 6.94E-10 | 8.51E-08 |
| ENSG00000146674  | IGFBP3   | protein_coding | 1.57  | 8.56E-10 | 1.04E-07 |
| ENSG00000148948  | LRRRC4C  | protein_coding | -1.33 | 8.65E-10 | 1.04E-07 |
| ENSG00000198554  | WDHD1    | protein_coding | -0.86 | 8.76E-10 | 1.05E-07 |

|                 |          |                |       |          |          |
|-----------------|----------|----------------|-------|----------|----------|
| ENSG00000133606 | MKRN1    | protein_coding | 0.80  | 9.04E-10 | 1.08E-07 |
| ENSG00000183762 | KREMEN1  | protein_coding | -1.31 | 9.31E-10 | 1.10E-07 |
| ENSG00000187123 | LYPD6    | protein_coding | -1.06 | 1.16E-09 | 1.36E-07 |
| ENSG00000133740 | E2F5     | protein_coding | -1.46 | 1.24E-09 | 1.45E-07 |
| ENSG00000182158 | CREB3L2  | protein_coding | -1.16 | 1.28E-09 | 1.48E-07 |
| ENSG00000136826 | KLF4     | protein_coding | -1.04 | 1.38E-09 | 1.58E-07 |
| ENSG00000113615 | SEC24A   | protein_coding | -0.95 | 1.49E-09 | 1.69E-07 |
| ENSG00000128872 | TMOD2    | protein_coding | -0.96 | 1.49E-09 | 1.69E-07 |
| ENSG00000100219 | XBP1     | protein_coding | -0.78 | 1.62E-09 | 1.82E-07 |
| ENSG00000000460 | C1orf112 | protein_coding | -1.02 | 1.81E-09 | 2.02E-07 |
| ENSG00000118523 | CTGF     | protein_coding | -1.21 | 1.83E-09 | 2.03E-07 |
| ENSG00000169902 | TPST1    | protein_coding | -1.13 | 2.41E-09 | 2.64E-07 |
| ENSG0000013016  | EHD3     | protein_coding | -1.37 | 2.46E-09 | 2.67E-07 |
| ENSG00000069188 | SDK2     | protein_coding | 1.03  | 2.48E-09 | 2.67E-07 |
| ENSG00000136237 | RAPGEF5  | protein_coding | -1.42 | 2.48E-09 | 2.67E-07 |
| ENSG00000197299 | BLM      | protein_coding | -0.82 | 2.53E-09 | 2.71E-07 |
| ENSG00000136010 | ALDH1L2  | protein_coding | -0.96 | 2.69E-09 | 2.84E-07 |
| ENSG00000151414 | NEK7     | protein_coding | -1.01 | 2.67E-09 | 2.84E-07 |
| ENSG00000122986 | HVCN1    | protein_coding | -1.00 | 2.90E-09 | 3.05E-07 |
| ENSG00000094804 | CDC6     | protein_coding | -0.88 | 3.10E-09 | 3.22E-07 |
| ENSG00000183049 | CAMK1D   | protein_coding | 1.07  | 3.12E-09 | 3.23E-07 |
| ENSG00000153162 | BMP6     | protein_coding | -1.24 | 3.50E-09 | 3.60E-07 |
| ENSG00000131374 | TBC1D5   | protein_coding | 0.81  | 3.69E-09 | 3.77E-07 |
| ENSG00000169180 | XPO6     | protein_coding | 0.83  | 3.84E-09 | 3.90E-07 |
| ENSG00000186470 | BTN3A2   | protein_coding | 0.77  | 3.92E-09 | 3.96E-07 |
| ENSG00000114541 | FRMD4B   | protein_coding | -1.34 | 4.18E-09 | 4.19E-07 |
| ENSG00000146950 | SHROOM2  | protein_coding | -1.06 | 4.42E-09 | 4.40E-07 |
| ENSG00000174010 | KLHL15   | protein_coding | -0.92 | 4.88E-09 | 4.83E-07 |
| ENSG00000112902 | SEMA5A   | protein_coding | 0.85  | 4.93E-09 | 4.84E-07 |
| ENSG00000057294 | PKP2     | protein_coding | -1.01 | 5.01E-09 | 4.90E-07 |
| ENSG00000117153 | KLHL12   | protein_coding | -0.69 | 5.14E-09 | 4.99E-07 |
| ENSG00000154511 | FAM69A   | protein_coding | -1.17 | 5.24E-09 | 5.05E-07 |
| ENSG00000150867 | PIP4K2A  | protein_coding | -0.75 | 5.84E-09 | 5.60E-07 |
| ENSG00000143512 | HHIPL2   | protein_coding | 1.15  | 5.88E-09 | 5.61E-07 |
| ENSG00000047662 | FAM184B  | protein_coding | -1.02 | 6.02E-09 | 5.67E-07 |
| ENSG00000196139 | AKR1C3   | protein_coding | 1.34  | 5.99E-09 | 5.67E-07 |
| ENSG00000107679 | PLEKHA1  | protein_coding | -1.22 | 6.07E-09 | 5.68E-07 |
| ENSG00000143322 | ABL2     | protein_coding | -0.62 | 6.23E-09 | 5.80E-07 |
| ENSG00000119335 | SET      | protein_coding | -0.71 | 6.77E-09 | 6.27E-07 |
| ENSG00000111247 | RAD51AP1 | protein_coding | -0.79 | 1.01E-08 | 9.33E-07 |
| ENSG00000171345 | KRT19    | protein_coding | -1.64 | 1.14E-08 | 1.04E-06 |
| ENSG00000175984 | DENND2C  | protein_coding | -1.28 | 1.42E-08 | 1.29E-06 |
| ENSG00000120802 | TMPO     | protein_coding | -0.73 | 1.49E-08 | 1.35E-06 |
| ENSG00000115414 | FN1      | protein_coding | -0.72 | 1.51E-08 | 1.36E-06 |
| ENSG00000153956 | CACNA2D1 | protein_coding | 1.49  | 1.55E-08 | 1.39E-06 |
| ENSG00000120211 | INSL4    | protein_coding | -2.05 | 1.62E-08 | 1.44E-06 |
| ENSG00000139496 | NUP58    | protein_coding | -0.74 | 1.73E-08 | 1.53E-06 |
| ENSG00000109586 | GALNT7   | protein_coding | -0.84 | 1.82E-08 | 1.59E-06 |
| ENSG00000110048 | OSBP     | protein_coding | 0.77  | 1.92E-08 | 1.66E-06 |
| ENSG00000135823 | STX6     | protein_coding | 0.89  | 2.03E-08 | 1.75E-06 |
| ENSG00000104490 | NCALD    | protein_coding | 0.88  | 2.22E-08 | 1.90E-06 |
| ENSG00000143418 | CERS2    | protein_coding | 0.68  | 2.35E-08 | 2.00E-06 |
| ENSG00000173281 | PPP1R3B  | protein_coding | -0.90 | 2.47E-08 | 2.09E-06 |
| ENSG00000064989 | CALCRL   | protein_coding | -1.03 | 2.49E-08 | 2.10E-06 |
| ENSG00000085563 | ABCB1    | protein_coding | -0.90 | 2.80E-08 | 2.35E-06 |
| ENSG00000150782 | IL18     | protein_coding | -1.15 | 2.88E-08 | 2.39E-06 |
| ENSG00000182310 | SPACA6   | protein_coding | 1.02  | 2.89E-08 | 2.39E-06 |
| ENSG00000170537 | TMC7     | protein_coding | -0.88 | 3.01E-08 | 2.48E-06 |
| ENSG00000152804 | HHEX     | protein_coding | -1.14 | 3.92E-08 | 3.22E-06 |
| ENSG00000130518 | KIAA1683 | protein_coding | 1.35  | 4.20E-08 | 3.41E-06 |
| ENSG00000146426 | TIAM2    | protein_coding | -0.85 | 4.55E-08 | 3.66E-06 |
| ENSG00000115107 | STEAP3   | protein_coding | 0.77  | 4.76E-08 | 3.79E-06 |
| ENSG00000159335 | PTMS     | protein_coding | 1.16  | 4.80E-08 | 3.80E-06 |
| ENSG00000184988 | TMEM106A | protein_coding | -0.78 | 4.85E-08 | 3.82E-06 |
| ENSG00000108924 | HLF      | protein_coding | 1.06  | 4.96E-08 | 3.89E-06 |



|                 |            |                |       |          |          |
|-----------------|------------|----------------|-------|----------|----------|
| ENSG00000164236 | ANKRD33B   | protein_coding | -1.02 | 5.13E-08 | 4.00E-06 |
| ENSG00000145416 | 1-Mar      | protein_coding | -1.03 | 5.40E-08 | 4.19E-06 |
| ENSG00000188991 | SLC15A5    | protein_coding | -2.28 | 5.92E-08 | 4.55E-06 |
| ENSG00000135074 | ADAM19     | protein_coding | -0.90 | 6.03E-08 | 4.62E-06 |
| ENSG00000180801 | ARSJ       | protein_coding | -0.95 | 6.12E-08 | 4.66E-06 |
| ENSG00000145990 | GFOD1      | protein_coding | -0.98 | 6.50E-08 | 4.92E-06 |
| ENSG00000136492 | BRIP1      | protein_coding | -0.70 | 6.65E-08 | 5.01E-06 |
| ENSG00000081059 | TCF7       | protein_coding | 1.45  | 6.80E-08 | 5.10E-06 |
| ENSG00000197472 | ZNF695     | protein_coding | -1.32 | 7.15E-08 | 5.34E-06 |
| ENSG00000250644 | AC068580.4 | protein_coding | 1.56  | 7.71E-08 | 5.73E-06 |
| ENSG00000119328 | FAM206A    | protein_coding | -1.06 | 7.81E-08 | 5.78E-06 |
| ENSG00000163257 | DCAF16     | protein_coding | -0.66 | 7.96E-08 | 5.86E-06 |
| ENSG00000124767 | GLO1       | protein_coding | -0.75 | 8.18E-08 | 6.00E-06 |
| ENSG00000135931 | ARMC9      | protein_coding | 0.89  | 8.58E-08 | 6.23E-06 |
| ENSG00000185345 | PRKN       | protein_coding | 1.11  | 8.81E-08 | 6.37E-06 |
| ENSG00000172795 | DCP2       | protein_coding | -1.03 | 8.89E-08 | 6.40E-06 |
| ENSG00000156299 | TIAM1      | protein_coding | 0.79  | 9.24E-08 | 6.62E-06 |
| ENSG00000184731 | FAM110C    | protein_coding | 0.98  | 9.43E-08 | 6.73E-06 |
| ENSG00000114346 | ECT2       | protein_coding | -0.76 | 9.54E-08 | 6.77E-06 |
| ENSG00000119729 | RHOQ       | protein_coding | -1.05 | 9.82E-08 | 6.94E-06 |
| ENSG00000095203 | EPB41L4B   | protein_coding | -0.78 | 1.05E-07 | 7.41E-06 |
| ENSG00000105270 | CLIP3      | protein_coding | 1.57  | 1.07E-07 | 7.48E-06 |
| ENSG00000164164 | OTUD4      | protein_coding | -0.65 | 1.12E-07 | 7.84E-06 |
| ENSG00000204923 | FBXO48     | protein_coding | -1.03 | 1.24E-07 | 8.57E-06 |
| ENSG00000272636 | DOC2B      | protein_coding | -1.67 | 1.24E-07 | 8.57E-06 |
| ENSG00000100580 | TMED8      | protein_coding | 0.79  | 1.34E-07 | 9.25E-06 |
| ENSG00000125347 | IRF1       | protein_coding | 0.93  | 1.40E-07 | 9.57E-06 |
| ENSG00000152127 | MGAT5      | protein_coding | -0.65 | 1.44E-07 | 9.80E-06 |
| ENSG00000256463 | SALL3      | protein_coding | -1.54 | 1.50E-07 | 1.02E-05 |
| ENSG00000244242 | IFITM10    | protein_coding | 1.95  | 1.53E-07 | 1.04E-05 |
| ENSG00000155561 | NUP205     | protein_coding | -0.73 | 1.56E-07 | 1.05E-05 |
| ENSG00000181019 | NQO1       | protein_coding | 0.71  | 1.57E-07 | 1.05E-05 |
| ENSG00000138180 | CEP55      | protein_coding | -0.68 | 1.59E-07 | 1.06E-05 |
| ENSG00000171208 | NETO2      | protein_coding | -0.87 | 1.63E-07 | 1.09E-05 |
| ENSG00000184156 | KCNQ3      | protein_coding | -1.65 | 1.71E-07 | 1.13E-05 |
| ENSG00000102384 | CENPI      | protein_coding | -1.10 | 1.76E-07 | 1.16E-05 |
| ENSG00000159314 | ARHGAP27   | protein_coding | 1.19  | 1.82E-07 | 1.20E-05 |
| ENSG00000164124 | TMEM144    | protein_coding | -0.97 | 1.96E-07 | 1.28E-05 |
| ENSG00000138160 | KIF11      | protein_coding | -0.64 | 1.98E-07 | 1.28E-05 |
| ENSG00000165474 | GJB2       | protein_coding | -1.48 | 1.97E-07 | 1.28E-05 |
| ENSG00000143375 | CGN        | protein_coding | 1.66  | 2.02E-07 | 1.30E-05 |
| ENSG00000116133 | DHCR24     | protein_coding | -0.90 | 2.04E-07 | 1.31E-05 |
| ENSG00000146918 | NCAPG2     | protein_coding | -0.61 | 2.07E-07 | 1.33E-05 |
| ENSG00000138092 | CENPO      | protein_coding | -0.57 | 2.09E-07 | 1.33E-05 |
| ENSG00000188993 | LRRRC66    | protein_coding | 0.96  | 2.29E-07 | 1.46E-05 |
| ENSG00000088854 | C20orf194  | protein_coding | -0.70 | 2.39E-07 | 1.50E-05 |
| ENSG00000164023 | SGMS2      | protein_coding | -1.20 | 2.38E-07 | 1.50E-05 |
| ENSG00000165959 | CLMN       | protein_coding | -0.90 | 2.62E-07 | 1.64E-05 |
| ENSG00000171320 | ESCO2      | protein_coding | -0.89 | 2.64E-07 | 1.64E-05 |
| ENSG00000111319 | SCNN1A     | protein_coding | 1.07  | 2.68E-07 | 1.66E-05 |
| ENSG00000114450 | GNB4       | protein_coding | -1.19 | 2.79E-07 | 1.72E-05 |
| ENSG00000136122 | BORA       | protein_coding | -0.83 | 2.83E-07 | 1.74E-05 |
| ENSG00000169871 | TRIM56     | protein_coding | 0.60  | 2.97E-07 | 1.82E-05 |
| ENSG00000072310 | SREBF1     | protein_coding | 0.98  | 3.15E-07 | 1.93E-05 |
| ENSG00000164045 | CDC25A     | protein_coding | -1.07 | 3.37E-07 | 2.04E-05 |
| ENSG00000120742 | SERP1      | protein_coding | -0.89 | 3.43E-07 | 2.06E-05 |
| ENSG00000250722 | SELENOP    | protein_coding | 0.87  | 3.42E-07 | 2.06E-05 |
| ENSG00000074590 | NUAK1      | protein_coding | -0.62 | 3.46E-07 | 2.07E-05 |
| ENSG00000139631 | CSAD       | protein_coding | 0.95  | 3.51E-07 | 2.10E-05 |
| ENSG00000163293 | NIPAL1     | protein_coding | -1.01 | 3.52E-07 | 2.10E-05 |
| ENSG00000003987 | MTMR7      | protein_coding | -1.92 | 3.67E-07 | 2.15E-05 |
| ENSG00000075223 | SEMA3C     | protein_coding | 0.87  | 3.68E-07 | 2.15E-05 |
| ENSG00000138829 | FBN2       | protein_coding | -0.73 | 3.68E-07 | 2.15E-05 |
| ENSG00000163492 | CCDC141    | protein_coding | -1.15 | 3.72E-07 | 2.15E-05 |
| ENSG00000176142 | TMEM39A    | protein_coding | -0.85 | 3.71E-07 | 2.15E-05 |

|                 |            |                |       |          |          |
|-----------------|------------|----------------|-------|----------|----------|
| ENSG00000181826 | RELL1      | protein_coding | -0.76 | 3.63E-07 | 2.15E-05 |
| ENSG00000037280 | FLT4       | protein_coding | -1.12 | 3.83E-07 | 2.21E-05 |
| ENSG00000198373 | WWP2       | protein_coding | -0.73 | 3.85E-07 | 2.21E-05 |
| ENSG00000123219 | CENPK      | protein_coding | -0.93 | 3.92E-07 | 2.23E-05 |
| ENSG00000154839 | SKA1       | protein_coding | -0.77 | 4.02E-07 | 2.28E-05 |
| ENSG00000170379 | TCAF2      | protein_coding | -1.23 | 4.02E-07 | 2.28E-05 |
| ENSG00000197415 | VEPH1      | protein_coding | -1.00 | 4.05E-07 | 2.28E-05 |
| ENSG00000159720 | ATP6V0D1   | protein_coding | 1.17  | 4.13E-07 | 2.32E-05 |
| ENSG00000172071 | EIF2AK3    | protein_coding | -0.72 | 4.40E-07 | 2.46E-05 |
| ENSG00000134247 | PTGFRN     | protein_coding | -0.74 | 4.56E-07 | 2.54E-05 |
| ENSG00000186088 | GSAP       | protein_coding | -1.11 | 4.61E-07 | 2.56E-05 |
| ENSG00000139354 | GAS2L3     | protein_coding | -0.75 | 4.75E-07 | 2.63E-05 |
| ENSG00000106541 | AGR2       | protein_coding | -1.79 | 4.97E-07 | 2.72E-05 |
| ENSG00000152455 | SUV39H2    | protein_coding | -0.84 | 4.96E-07 | 2.72E-05 |
| ENSG00000171488 | LRRRC8C    | protein_coding | -1.34 | 4.96E-07 | 2.72E-05 |
| ENSG00000149554 | CHEK1      | protein_coding | -0.74 | 5.17E-07 | 2.82E-05 |
| ENSG00000146410 | MTRFR2     | protein_coding | -0.78 | 5.31E-07 | 2.89E-05 |
| ENSG00000206053 | JPT2       | protein_coding | -0.81 | 5.62E-07 | 3.05E-05 |
| ENSG00000163820 | FYCO1      | protein_coding | 0.93  | 6.08E-07 | 3.27E-05 |
| ENSG00000169213 | RAB3B      | protein_coding | -1.14 | 6.07E-07 | 3.27E-05 |
| ENSG00000168952 | STXBP6     | protein_coding | -1.11 | 6.12E-07 | 3.29E-05 |
| ENSG00000100906 | NFKBIA     | protein_coding | 0.91  | 6.16E-07 | 3.29E-05 |
| ENSG00000084710 | EFR3B      | protein_coding | -0.94 | 6.25E-07 | 3.33E-05 |
| ENSG00000156966 | B3GNT7     | protein_coding | -1.17 | 6.49E-07 | 3.45E-05 |
| ENSG00000148826 | NKX6-2     | protein_coding | -2.41 | 6.64E-07 | 3.52E-05 |
| ENSG00000147536 | GINS4      | protein_coding | -0.67 | 7.02E-07 | 3.69E-05 |
| ENSG00000101000 | PROCR      | protein_coding | 0.80  | 7.11E-07 | 3.73E-05 |
| ENSG00000132274 | TRIM22     | protein_coding | 0.98  | 7.13E-07 | 3.73E-05 |
| ENSG00000136868 | SLC31A1    | protein_coding | -0.76 | 7.20E-07 | 3.75E-05 |
| ENSG00000163697 | APBB2      | protein_coding | 0.59  | 7.36E-07 | 3.82E-05 |
| ENSG00000129317 | PUS7L      | protein_coding | -0.71 | 7.42E-07 | 3.84E-05 |
| ENSG00000160588 | MPZL3      | protein_coding | -1.15 | 7.64E-07 | 3.94E-05 |
| ENSG00000181544 | FANCB      | protein_coding | -0.98 | 7.79E-07 | 4.00E-05 |
| ENSG00000248109 | AC011346.1 | protein_coding | -0.94 | 7.92E-07 | 4.06E-05 |
| ENSG00000162817 | C1orf115   | protein_coding | 0.75  | 8.22E-07 | 4.19E-05 |
| ENSG00000213988 | ZNF90      | protein_coding | -0.86 | 8.23E-07 | 4.19E-05 |
| ENSG00000163507 | KIAA1524   | protein_coding | -0.66 | 8.45E-07 | 4.29E-05 |
| ENSG00000068078 | FGFR3      | protein_coding | -1.46 | 8.86E-07 | 4.48E-05 |
| ENSG00000121152 | NCAPH      | protein_coding | -0.70 | 8.90E-07 | 4.49E-05 |
| ENSG00000163536 | SERPINI1   | protein_coding | 0.94  | 9.17E-07 | 4.61E-05 |
| ENSG00000139174 | PRICKLE1   | protein_coding | -0.88 | 9.53E-07 | 4.78E-05 |
| ENSG00000126787 | DLGAP5     | protein_coding | -0.65 | 9.57E-07 | 4.78E-05 |
| ENSG00000119283 | TRIM67     | protein_coding | -1.58 | 9.93E-07 | 4.93E-05 |
| ENSG00000185950 | IRS2       | protein_coding | -1.02 | 9.93E-07 | 4.93E-05 |
| ENSG00000071539 | TRIP13     | protein_coding | -0.78 | 1.01E-06 | 5.00E-05 |
| ENSG00000145545 | SRD5A1     | protein_coding | -0.99 | 1.02E-06 | 5.00E-05 |
| ENSG00000145569 | FAM105A    | protein_coding | -1.21 | 1.02E-06 | 5.00E-05 |
| ENSG00000057663 | ATG5       | protein_coding | 0.72  | 1.05E-06 | 5.13E-05 |
| ENSG00000198088 | NUP62CL    | protein_coding | -1.23 | 1.05E-06 | 5.13E-05 |
| ENSG00000124143 | ARHGAP40   | protein_coding | -1.30 | 1.15E-06 | 5.55E-05 |
| ENSG00000139618 | BRCA2      | protein_coding | -0.69 | 1.16E-06 | 5.58E-05 |
| ENSG00000196584 | XRCC2      | protein_coding | -0.68 | 1.16E-06 | 5.58E-05 |
| ENSG00000110092 | CCND1      | protein_coding | -1.18 | 1.17E-06 | 5.59E-05 |
| ENSG00000128656 | CHN1       | protein_coding | -1.11 | 1.19E-06 | 5.67E-05 |
| ENSG00000243244 | STON1      | protein_coding | 1.19  | 1.22E-06 | 5.80E-05 |
| ENSG00000104081 | BMF        | protein_coding | 0.91  | 1.24E-06 | 5.86E-05 |
| ENSG00000152253 | SPC25      | protein_coding | -0.69 | 1.27E-06 | 6.00E-05 |
| ENSG00000022840 | RNF10      | protein_coding | 0.73  | 1.28E-06 | 6.02E-05 |
| ENSG00000112763 | BTN2A1     | protein_coding | 0.71  | 1.33E-06 | 6.21E-05 |
| ENSG00000151849 | CENPJ      | protein_coding | -0.71 | 1.32E-06 | 6.21E-05 |
| ENSG00000196154 | S100A4     | protein_coding | 0.81  | 1.33E-06 | 6.21E-05 |
| ENSG00000165186 | PTCHD1     | protein_coding | -0.95 | 1.34E-06 | 6.26E-05 |
| ENSG00000168994 | PXDC1      | protein_coding | -0.67 | 1.35E-06 | 6.27E-05 |
| ENSG00000120805 | ARL1       | protein_coding | -0.71 | 1.37E-06 | 6.33E-05 |
| ENSG00000168078 | PBK        | protein_coding | -0.79 | 1.47E-06 | 6.77E-05 |

|                 |          |                |       |          |          |
|-----------------|----------|----------------|-------|----------|----------|
| ENSG00000182795 | C1orf116 | protein_coding | -1.19 | 1.48E-06 | 6.79E-05 |
| ENSG00000186815 | TPCN1    | protein_coding | 0.80  | 1.50E-06 | 6.86E-05 |
| ENSG00000124496 | TRERF1   | protein_coding | 0.68  | 1.57E-06 | 7.17E-05 |
| ENSG00000108797 | CNTNAP1  | protein_coding | 0.76  | 1.59E-06 | 7.23E-05 |
| ENSG00000225830 | ERCC6    | protein_coding | 0.70  | 1.62E-06 | 7.36E-05 |
| ENSG00000197822 | OCLN     | protein_coding | -0.95 | 1.65E-06 | 7.47E-05 |
| ENSG00000169247 | SH3TC2   | protein_coding | -0.87 | 1.68E-06 | 7.58E-05 |
| ENSG00000175155 | YPEL2    | protein_coding | 1.27  | 1.81E-06 | 8.16E-05 |
| ENSG00000169299 | PGM2     | protein_coding | -0.81 | 1.89E-06 | 8.47E-05 |
| ENSG00000128923 | MINDY2   | protein_coding | -1.24 | 1.96E-06 | 8.73E-05 |
| ENSG00000136235 | GPNMB    | protein_coding | 0.67  | 2.06E-06 | 9.14E-05 |
| ENSG00000104055 | TGM5     | protein_coding | -1.17 | 2.14E-06 | 9.48E-05 |
| ENSG00000175395 | ZNF25    | protein_coding | 0.95  | 2.17E-06 | 9.59E-05 |
| ENSG00000142634 | EFHD2    | protein_coding | -1.19 | 2.26E-06 | 9.94E-05 |
| ENSG00000221963 | APOL6    | protein_coding | 1.05  | 2.27E-06 | 9.95E-05 |
| ENSG00000108100 | CCNY     | protein_coding | 0.84  | 2.41E-06 | 1.06E-04 |
| ENSG00000076770 | MBNL3    | protein_coding | -1.31 | 2.42E-06 | 1.06E-04 |
| ENSG00000116406 | EDEM3    | protein_coding | -0.82 | 2.44E-06 | 1.06E-04 |
| ENSG00000139832 | RAB20    | protein_coding | -0.95 | 2.47E-06 | 1.07E-04 |
| ENSG00000087266 | SH3BP2   | protein_coding | 0.70  | 2.49E-06 | 1.08E-04 |
| ENSG00000102781 | KATNAL1  | protein_coding | -0.69 | 2.51E-06 | 1.08E-04 |
| ENSG00000093183 | SEC22C   | protein_coding | -0.79 | 2.53E-06 | 1.09E-04 |
| ENSG00000067082 | KLF6     | protein_coding | -0.84 | 2.54E-06 | 1.09E-04 |
| ENSG00000221818 | EBF2     | protein_coding | -2.72 | 2.58E-06 | 1.11E-04 |
| ENSG00000140525 | FANCI    | protein_coding | -0.60 | 2.64E-06 | 1.13E-04 |
| ENSG00000169184 | MN1      | protein_coding | 0.86  | 2.66E-06 | 1.13E-04 |
| ENSG00000103222 | ABCC1    | protein_coding | 0.88  | 2.67E-06 | 1.13E-04 |
| ENSG00000031691 | CENPQ    | protein_coding | -0.89 | 2.72E-06 | 1.15E-04 |
| ENSG00000122707 | RECK     | protein_coding | 0.91  | 2.81E-06 | 1.19E-04 |
| ENSG00000025772 | TOMM34   | protein_coding | -0.68 | 2.89E-06 | 1.22E-04 |
| ENSG00000205189 | ZBTB10   | protein_coding | -0.70 | 3.00E-06 | 1.26E-04 |
| ENSG00000179331 | RAB39A   | protein_coding | -1.25 | 3.16E-06 | 1.32E-04 |
| ENSG00000165490 | DDIAS    | protein_coding | -0.89 | 3.35E-06 | 1.39E-04 |
| ENSG00000091651 | ORC6     | protein_coding | -0.59 | 3.46E-06 | 1.44E-04 |
| ENSG00000059804 | SLC2A3   | protein_coding | -1.12 | 3.50E-06 | 1.45E-04 |
| ENSG00000083067 | TRPM3    | protein_coding | -0.84 | 3.53E-06 | 1.46E-04 |
| ENSG00000120594 | PLXDC2   | protein_coding | 0.89  | 3.60E-06 | 1.48E-04 |
| ENSG00000164038 | SLC9B2   | protein_coding | -0.97 | 3.59E-06 | 1.48E-04 |
| ENSG00000099282 | TSPAN15  | protein_coding | 1.08  | 3.67E-06 | 1.50E-04 |
| ENSG00000118707 | TGIF2    | protein_coding | 0.75  | 3.67E-06 | 1.50E-04 |
| ENSG00000112769 | LAMA4    | protein_coding | -0.66 | 3.73E-06 | 1.52E-04 |
| ENSG00000023318 | ERP44    | protein_coding | -0.94 | 3.79E-06 | 1.54E-04 |
| ENSG00000068489 | PRR11    | protein_coding | -0.64 | 3.97E-06 | 1.61E-04 |
| ENSG00000006432 | MAP3K9   | protein_coding | -0.66 | 4.06E-06 | 1.64E-04 |
| ENSG00000167005 | NUDT21   | protein_coding | -0.96 | 4.27E-06 | 1.71E-04 |
| ENSG00000179119 | SPTY2D1  | protein_coding | -0.58 | 4.34E-06 | 1.74E-04 |
| ENSG00000138162 | TACC2    | protein_coding | 0.73  | 4.44E-06 | 1.77E-04 |
| ENSG00000069667 | RORA     | protein_coding | -1.00 | 4.51E-06 | 1.79E-04 |
| ENSG00000143412 | ANXA9    | protein_coding | 1.34  | 4.51E-06 | 1.79E-04 |
| ENSG00000174579 | MSL2     | protein_coding | -0.59 | 4.60E-06 | 1.81E-04 |
| ENSG00000111540 | RAB5B    | protein_coding | 0.65  | 4.64E-06 | 1.82E-04 |
| ENSG00000111962 | UST      | protein_coding | 0.74  | 4.63E-06 | 1.82E-04 |
| ENSG00000136240 | KDEL2    | protein_coding | -0.76 | 4.67E-06 | 1.82E-04 |
| ENSG00000101773 | RBBP8    | protein_coding | -0.79 | 4.86E-06 | 1.90E-04 |
| ENSG00000182307 | C8orf33  | protein_coding | -0.77 | 5.00E-06 | 1.94E-04 |
| ENSG00000117228 | GBP1     | protein_coding | 0.84  | 5.34E-06 | 2.07E-04 |
| ENSG00000154310 | TNIK     | protein_coding | 0.82  | 5.53E-06 | 2.13E-04 |
| ENSG00000163611 | SPICE1   | protein_coding | -0.70 | 6.06E-06 | 2.33E-04 |
| ENSG00000134013 | LOXL2    | protein_coding | 0.66  | 6.18E-06 | 2.37E-04 |
| ENSG00000143033 | MTF2     | protein_coding | -0.64 | 6.32E-06 | 2.41E-04 |
| ENSG00000170365 | SMAD1    | protein_coding | 0.73  | 6.45E-06 | 2.45E-04 |
| ENSG00000107643 | MAPK8    | protein_coding | -0.94 | 6.57E-06 | 2.50E-04 |
| ENSG00000157827 | FMNL2    | protein_coding | 0.64  | 6.62E-06 | 2.51E-04 |
| ENSG00000163346 | PBXIP1   | protein_coding | 0.88  | 6.87E-06 | 2.59E-04 |
| ENSG00000155858 | LSM11    | protein_coding | -0.73 | 6.92E-06 | 2.60E-04 |

|                 |          |                |       |          |          |
|-----------------|----------|----------------|-------|----------|----------|
| ENSG00000188042 | ARL4C    | protein_coding | 1.16  | 7.00E-06 | 2.63E-04 |
| ENSG00000156642 | NPTN     | protein_coding | -0.85 | 7.13E-06 | 2.67E-04 |
| ENSG00000101040 | ZMYND8   | protein_coding | 0.53  | 7.28E-06 | 2.72E-04 |
| ENSG00000159479 | MED8     | protein_coding | -0.82 | 7.46E-06 | 2.78E-04 |
| ENSG00000105552 | BCAT2    | protein_coding | 0.89  | 7.76E-06 | 2.88E-04 |
| ENSG00000170624 | SGCD     | protein_coding | -1.15 | 7.77E-06 | 2.88E-04 |
| ENSG00000167034 | NKX3-1   | protein_coding | -0.65 | 7.83E-06 | 2.89E-04 |
| ENSG00000146278 | PNRC1    | protein_coding | 1.10  | 7.87E-06 | 2.90E-04 |
| ENSG00000197971 | MBP      | protein_coding | -0.74 | 8.16E-06 | 3.00E-04 |
| ENSG00000092010 | PSME1    | protein_coding | 0.53  | 8.26E-06 | 3.01E-04 |
| ENSG00000115904 | SOS1     | protein_coding | -0.79 | 8.25E-06 | 3.01E-04 |
| ENSG00000133985 | TTC9     | protein_coding | -0.86 | 8.22E-06 | 3.01E-04 |
| ENSG00000169379 | ARL13B   | protein_coding | -0.69 | 8.24E-06 | 3.01E-04 |
| ENSG00000188313 | PLSCR1   | protein_coding | -0.70 | 8.28E-06 | 3.01E-04 |
| ENSG00000112276 | BVES     | protein_coding | -0.93 | 8.36E-06 | 3.04E-04 |
| ENSG00000176853 | FAM91A1  | protein_coding | -0.97 | 8.39E-06 | 3.04E-04 |
| ENSG00000119801 | YPEL5    | protein_coding | 0.90  | 8.43E-06 | 3.05E-04 |
| ENSG00000106537 | TSPAN13  | protein_coding | -0.85 | 8.60E-06 | 3.10E-04 |
| ENSG00000184661 | CDCA2    | protein_coding | -0.61 | 8.61E-06 | 3.10E-04 |
| ENSG00000115641 | FHL2     | protein_coding | 0.94  | 8.73E-06 | 3.13E-04 |
| ENSG00000150347 | ARID5B   | protein_coding | 0.65  | 8.72E-06 | 3.13E-04 |
| ENSG00000177189 | RPS6KA3  | protein_coding | -0.63 | 8.81E-06 | 3.15E-04 |
| ENSG00000198018 | ENTPD7   | protein_coding | -0.71 | 8.84E-06 | 3.15E-04 |
| ENSG00000272398 | CD24     | protein_coding | -1.27 | 8.89E-06 | 3.16E-04 |
| ENSG00000107099 | DOCK8    | protein_coding | 1.43  | 8.95E-06 | 3.17E-04 |
| ENSG00000174839 | DENND6A  | protein_coding | -0.73 | 8.95E-06 | 3.17E-04 |
| ENSG00000185585 | OLFML2A  | protein_coding | -0.95 | 9.07E-06 | 3.21E-04 |
| ENSG00000115825 | PRKD3    | protein_coding | 0.67  | 9.30E-06 | 3.26E-04 |
| ENSG00000125249 | RAP2A    | protein_coding | 1.11  | 9.28E-06 | 3.26E-04 |
| ENSG00000179010 | MRFAP1   | protein_coding | -0.64 | 9.26E-06 | 3.26E-04 |
| ENSG00000134369 | NAV1     | protein_coding | 0.82  | 9.60E-06 | 3.35E-04 |
| ENSG00000168306 | ACOX2    | protein_coding | -1.31 | 9.57E-06 | 3.35E-04 |
| ENSG00000196141 | SPATS2L  | protein_coding | -0.63 | 9.61E-06 | 3.35E-04 |
| ENSG00000111412 | C12orf49 | protein_coding | -0.91 | 9.84E-06 | 3.42E-04 |
| ENSG00000125885 | MCM8     | protein_coding | -0.59 | 9.95E-06 | 3.45E-04 |
| ENSG00000163995 | ABLIM2   | protein_coding | -1.73 | 1.02E-05 | 3.54E-04 |
| ENSG00000157388 | CACNA1D  | protein_coding | 0.60  | 1.05E-05 | 3.62E-04 |
| ENSG00000133110 | POSTN    | protein_coding | -1.04 | 1.07E-05 | 3.66E-04 |
| ENSG00000169604 | ANTXR1   | protein_coding | 0.66  | 1.07E-05 | 3.66E-04 |
| ENSG00000154127 | UBASH3B  | protein_coding | -0.77 | 1.07E-05 | 3.66E-04 |
| ENSG00000170004 | CHD3     | protein_coding | 0.90  | 1.10E-05 | 3.75E-04 |
| ENSG00000158352 | SHROOM4  | protein_coding | -0.83 | 1.11E-05 | 3.79E-04 |
| ENSG00000113194 | FAP2     | protein_coding | -0.59 | 1.15E-05 | 3.89E-04 |
| ENSG00000139192 | TAPBPL   | protein_coding | 1.07  | 1.17E-05 | 3.97E-04 |
| ENSG00000150637 | CD226    | protein_coding | -1.47 | 1.17E-05 | 3.97E-04 |
| ENSG00000149577 | SIDT2    | protein_coding | 0.70  | 1.18E-05 | 3.99E-04 |
| ENSG00000150961 | SEC24D   | protein_coding | -0.52 | 1.21E-05 | 4.06E-04 |
| ENSG00000154640 | BTG3     | protein_coding | -0.62 | 1.21E-05 | 4.06E-04 |
| ENSG00000035403 | VCL      | protein_coding | 0.73  | 1.23E-05 | 4.12E-04 |
| ENSG00000071282 | LMCD1    | protein_coding | -1.01 | 1.24E-05 | 4.14E-04 |
| ENSG00000164466 | SFXN1    | protein_coding | -0.60 | 1.27E-05 | 4.22E-04 |
| ENSG00000164463 | CREBRF   | protein_coding | 0.82  | 1.27E-05 | 4.23E-04 |
| ENSG00000175606 | TMEM70   | protein_coding | -0.91 | 1.31E-05 | 4.32E-04 |
| ENSG00000164024 | METAP1   | protein_coding | -0.82 | 1.31E-05 | 4.33E-04 |
| ENSG00000146858 | ZC3HAV1L | protein_coding | -0.71 | 1.32E-05 | 4.35E-04 |
| ENSG00000170153 | RNF150   | protein_coding | 0.92  | 1.35E-05 | 4.44E-04 |
| ENSG00000162654 | GBP4     | protein_coding | 1.28  | 1.37E-05 | 4.49E-04 |
| ENSG00000126010 | GRPR     | protein_coding | -1.03 | 1.38E-05 | 4.53E-04 |
| ENSG00000138801 | PAPSS1   | protein_coding | -0.56 | 1.39E-05 | 4.55E-04 |
| ENSG00000181450 | ZNF678   | protein_coding | -0.69 | 1.40E-05 | 4.56E-04 |
| ENSG00000087076 | HSD17B14 | protein_coding | 0.93  | 1.41E-05 | 4.58E-04 |
| ENSG00000183814 | LIN9     | protein_coding | -0.74 | 1.41E-05 | 4.58E-04 |
| ENSG00000196517 | SLC6A9   | protein_coding | 1.77  | 1.42E-05 | 4.60E-04 |
| ENSG00000177981 | ASB8     | protein_coding | 0.65  | 1.45E-05 | 4.68E-04 |
| ENSG00000110660 | SLC35F2  | protein_coding | -0.77 | 1.46E-05 | 4.70E-04 |

|                 |          |                |       |          |          |
|-----------------|----------|----------------|-------|----------|----------|
| ENSG00000198369 | SPRED2   | protein_coding | -0.57 | 1.47E-05 | 4.75E-04 |
| ENSG00000158089 | GALNT14  | protein_coding | -0.93 | 1.49E-05 | 4.78E-04 |
| ENSG00000112541 | PDE10A   | protein_coding | 1.20  | 1.50E-05 | 4.81E-04 |
| ENSG00000129810 | SGO1     | protein_coding | -0.67 | 1.51E-05 | 4.83E-04 |
| ENSG00000198855 | FICD     | protein_coding | -0.76 | 1.52E-05 | 4.83E-04 |
| ENSG00000131389 | SLC6A6   | protein_coding | 0.70  | 1.52E-05 | 4.83E-04 |
| ENSG00000092377 | TBL1Y    | protein_coding | -1.53 | 1.55E-05 | 4.88E-04 |
| ENSG00000153006 | SREK1IP1 | protein_coding | -0.86 | 1.55E-05 | 4.88E-04 |
| ENSG00000223501 | VPS52    | protein_coding | 0.57  | 1.55E-05 | 4.88E-04 |
| ENSG00000145681 | HAPLN1   | protein_coding | -1.18 | 1.56E-05 | 4.89E-04 |
| ENSG00000176438 | SYNE3    | protein_coding | 0.78  | 1.62E-05 | 5.07E-04 |
| ENSG00000183401 | CCDC159  | protein_coding | 1.15  | 1.64E-05 | 5.12E-04 |
| ENSG00000153487 | ING1     | protein_coding | -0.83 | 1.67E-05 | 5.20E-04 |
| ENSG00000133639 | BTG1     | protein_coding | 0.72  | 1.67E-05 | 5.21E-04 |
| ENSG00000091409 | ITGA6    | protein_coding | -0.89 | 1.68E-05 | 5.21E-04 |
| ENSG00000133872 | SARAF    | protein_coding | 1.00  | 1.71E-05 | 5.31E-04 |
| ENSG00000256043 | CTSO     | protein_coding | -1.38 | 1.73E-05 | 5.34E-04 |
| ENSG00000154736 | ADAMTS5  | protein_coding | 1.60  | 1.73E-05 | 5.34E-04 |
| ENSG00000166436 | TRIM66   | protein_coding | 0.70  | 1.79E-05 | 5.51E-04 |
| ENSG00000160710 | ADAR     | protein_coding | 0.79  | 1.84E-05 | 5.63E-04 |
| ENSG00000121691 | CAT      | protein_coding | 0.67  | 1.85E-05 | 5.66E-04 |
| ENSG00000064309 | CDON     | protein_coding | 0.74  | 1.90E-05 | 5.79E-04 |
| ENSG00000120334 | CENPL    | protein_coding | -0.67 | 1.92E-05 | 5.85E-04 |
| ENSG00000079257 | LXN      | protein_coding | 1.11  | 1.94E-05 | 5.88E-04 |
| ENSG00000149308 | NPAT     | protein_coding | -0.64 | 1.97E-05 | 5.97E-04 |
| ENSG00000137962 | ARHGAP29 | protein_coding | -0.89 | 1.98E-05 | 5.99E-04 |
| ENSG00000139734 | DIAPH3   | protein_coding | -0.60 | 1.98E-05 | 5.99E-04 |
| ENSG00000053254 | FOXN3    | protein_coding | -0.61 | 2.00E-05 | 6.03E-04 |
| ENSG00000166750 | SLFN5    | protein_coding | 0.65  | 2.04E-05 | 6.14E-04 |
| ENSG00000163347 | CLDN1    | protein_coding | -1.14 | 2.08E-05 | 6.22E-04 |
| ENSG00000187134 | AKR1C1   | protein_coding | 1.33  | 2.14E-05 | 6.41E-04 |
| ENSG00000196781 | TLE1     | protein_coding | 0.88  | 2.16E-05 | 6.45E-04 |
| ENSG00000139219 | COL2A1   | protein_coding | -0.87 | 2.17E-05 | 6.46E-04 |
| ENSG00000197329 | PELI1    | protein_coding | -0.81 | 2.21E-05 | 6.58E-04 |
| ENSG00000143248 | RGS5     | protein_coding | 1.18  | 2.27E-05 | 6.75E-04 |
| ENSG00000121579 | NAA50    | protein_coding | -0.58 | 2.34E-05 | 6.94E-04 |
| ENSG00000105173 | CCNE1    | protein_coding | -0.73 | 2.35E-05 | 6.95E-04 |
| ENSG00000115806 | GORASP2  | protein_coding | -0.61 | 2.35E-05 | 6.95E-04 |
| ENSG00000116983 | HPCAL4   | protein_coding | -1.23 | 2.49E-05 | 7.33E-04 |
| ENSG00000197020 | ZNF100   | protein_coding | -0.86 | 2.60E-05 | 7.64E-04 |
| ENSG00000148606 | POLR3A   | protein_coding | -0.50 | 2.61E-05 | 7.65E-04 |
| ENSG00000176208 | ATAD5    | protein_coding | -0.71 | 2.62E-05 | 7.67E-04 |
| ENSG00000120784 | ZFP30    | protein_coding | -0.65 | 2.64E-05 | 7.71E-04 |
| ENSG00000102547 | CAB39L   | protein_coding | -0.88 | 2.66E-05 | 7.77E-04 |
| ENSG00000124120 | TTPAL    | protein_coding | -0.56 | 2.68E-05 | 7.79E-04 |
| ENSG00000133789 | SWAP70   | protein_coding | -0.56 | 2.76E-05 | 8.01E-04 |
| ENSG00000072736 | NFATC3   | protein_coding | -0.59 | 2.81E-05 | 8.16E-04 |
| ENSG00000090889 | KIF4A    | protein_coding | -0.63 | 2.87E-05 | 8.29E-04 |
| ENSG00000166387 | PPFIBP2  | protein_coding | -0.69 | 2.88E-05 | 8.31E-04 |
| ENSG00000085840 | ORC1     | protein_coding | -0.86 | 2.90E-05 | 8.35E-04 |
| ENSG00000171316 | CHD7     | protein_coding | -0.71 | 2.95E-05 | 8.48E-04 |
| ENSG00000156463 | SH3RF2   | protein_coding | -0.80 | 2.98E-05 | 8.54E-04 |
| ENSG00000198492 | YTHDF2   | protein_coding | 0.62  | 2.98E-05 | 8.54E-04 |
| ENSG00000125266 | EFNB2    | protein_coding | -0.83 | 3.05E-05 | 8.73E-04 |
| ENSG00000196189 | SEMA4A   | protein_coding | 1.31  | 3.08E-05 | 8.79E-04 |
| ENSG00000165097 | KDM1B    | protein_coding | 0.60  | 3.17E-05 | 9.04E-04 |
| ENSG00000176046 | NUPR1    | protein_coding | 1.03  | 3.18E-05 | 9.04E-04 |
| ENSG00000137273 | FOXF2    | protein_coding | 0.83  | 3.20E-05 | 9.10E-04 |
| ENSG00000176049 | JAKMIP2  | protein_coding | 1.02  | 3.23E-05 | 9.15E-04 |
| ENSG00000112893 | MAN2A1   | protein_coding | -0.92 | 3.24E-05 | 9.16E-04 |
| ENSG00000120875 | DUSP4    | protein_coding | -0.63 | 3.25E-05 | 9.16E-04 |
| ENSG00000197256 | KANK2    | protein_coding | 0.89  | 3.28E-05 | 9.23E-04 |
| ENSG00000169136 | ATF5     | protein_coding | 0.71  | 3.35E-05 | 9.42E-04 |
| ENSG00000172888 | ZNF621   | protein_coding | -0.72 | 3.36E-05 | 9.44E-04 |
| ENSG00000145604 | SKP2     | protein_coding | -0.62 | 3.42E-05 | 9.58E-04 |

|                 |          |                |       |          |          |
|-----------------|----------|----------------|-------|----------|----------|
| ENSG00000174371 | EXO1     | protein_coding | -0.60 | 3.43E-05 | 9.58E-04 |
| ENSG00000125148 | MT2A     | protein_coding | 1.58  | 3.43E-05 | 9.59E-04 |
| ENSG00000166292 | TMEM100  | protein_coding | -0.73 | 3.47E-05 | 9.68E-04 |
| ENSG00000164318 | EGFLAM   | protein_coding | -0.67 | 3.48E-05 | 9.69E-04 |
| ENSG00000131149 | GSE1     | protein_coding | 0.50  | 3.49E-05 | 9.70E-04 |
| ENSG00000115486 | GGCX     | protein_coding | -0.50 | 3.50E-05 | 9.70E-04 |
| ENSG00000110422 | HIPK3    | protein_coding | 0.52  | 3.51E-05 | 9.72E-04 |
| ENSG00000140534 | TICRR    | protein_coding | -0.63 | 3.52E-05 | 9.73E-04 |
| ENSG00000189184 | PCDH18   | protein_coding | 0.77  | 3.53E-05 | 9.75E-04 |
| ENSG00000144554 | FANCD2   | protein_coding | -0.50 | 3.56E-05 | 9.81E-04 |
| ENSG00000181027 | FKRP     | protein_coding | 1.18  | 3.78E-05 | 1.04E-03 |
| ENSG00000186834 | HEXIM1   | protein_coding | 0.63  | 3.83E-05 | 1.05E-03 |
| ENSG00000173926 | 3-Mar    | protein_coding | -1.10 | 3.87E-05 | 1.06E-03 |
| ENSG00000112964 | GHR      | protein_coding | -0.84 | 3.88E-05 | 1.06E-03 |
| ENSG00000144847 | IGSF11   | protein_coding | -1.42 | 3.92E-05 | 1.07E-03 |
| ENSG00000198380 | GFPT1    | protein_coding | -0.60 | 3.92E-05 | 1.07E-03 |
| ENSG00000135312 | HTR1B    | protein_coding | 1.52  | 3.93E-05 | 1.07E-03 |
| ENSG00000133302 | SLF1     | protein_coding | -0.61 | 3.98E-05 | 1.08E-03 |
| ENSG00000108187 | PBLD     | protein_coding | 1.01  | 4.04E-05 | 1.09E-03 |
| ENSG00000144827 | ABHD10   | protein_coding | -0.68 | 4.09E-05 | 1.11E-03 |
| ENSG00000084112 | SSH1     | protein_coding | 0.55  | 4.11E-05 | 1.11E-03 |
| ENSG00000093009 | CDC45    | protein_coding | -0.63 | 4.26E-05 | 1.15E-03 |
| ENSG00000183111 | ARHGEF37 | protein_coding | 0.83  | 4.28E-05 | 1.15E-03 |
| ENSG00000101104 | PABPC1L  | protein_coding | 0.62  | 4.32E-05 | 1.16E-03 |
| ENSG00000178662 | CSRNP3   | protein_coding | 0.72  | 4.32E-05 | 1.16E-03 |
| ENSG00000081320 | STK17B   | protein_coding | -0.78 | 4.35E-05 | 1.16E-03 |
| ENSG00000151491 | EPS8     | protein_coding | -0.71 | 4.35E-05 | 1.16E-03 |
| ENSG00000147874 | HAUS6    | protein_coding | -0.53 | 4.51E-05 | 1.20E-03 |
| ENSG00000168453 | HR       | protein_coding | -1.75 | 4.53E-05 | 1.20E-03 |
| ENSG00000111679 | PTPN6    | protein_coding | 0.96  | 4.55E-05 | 1.21E-03 |
| ENSG00000187715 | KBTBD12  | protein_coding | -0.65 | 4.61E-05 | 1.22E-03 |
| ENSG00000011426 | ANLN     | protein_coding | -0.60 | 4.76E-05 | 1.26E-03 |
| ENSG00000075089 | ACTR6    | protein_coding | 0.98  | 4.78E-05 | 1.26E-03 |
| ENSG00000173918 | C1QTNF1  | protein_coding | 1.09  | 4.77E-05 | 1.26E-03 |
| ENSG00000167996 | FTH1     | protein_coding | 0.95  | 4.81E-05 | 1.26E-03 |
| ENSG00000139514 | SLC7A1   | protein_coding | -0.49 | 4.90E-05 | 1.29E-03 |
| ENSG00000040199 | PHLPP2   | protein_coding | -0.88 | 4.94E-05 | 1.29E-03 |
| ENSG00000140030 | GPR65    | protein_coding | -1.24 | 4.96E-05 | 1.29E-03 |
| ENSG00000029534 | ANK1     | protein_coding | 0.73  | 4.98E-05 | 1.30E-03 |
| ENSG00000129116 | PALLD    | protein_coding | -0.79 | 5.07E-05 | 1.32E-03 |
| ENSG00000197442 | MAP3K5   | protein_coding | -0.74 | 5.25E-05 | 1.36E-03 |
| ENSG00000122694 | GLIPR2   | protein_coding | 1.19  | 5.29E-05 | 1.37E-03 |
| ENSG00000113805 | CNTN3    | protein_coding | -0.86 | 5.32E-05 | 1.38E-03 |
| ENSG00000148943 | LIN7C    | protein_coding | -0.88 | 5.38E-05 | 1.39E-03 |
| ENSG00000139625 | MAP3K12  | protein_coding | 1.12  | 5.44E-05 | 1.40E-03 |
| ENSG00000106615 | RHEB     | protein_coding | -0.71 | 5.51E-05 | 1.42E-03 |
| ENSG00000163818 | LZTFL1   | protein_coding | -0.70 | 5.54E-05 | 1.42E-03 |
| ENSG00000118407 | FILIP1   | protein_coding | 1.47  | 5.60E-05 | 1.43E-03 |
| ENSG00000138606 | SHF      | protein_coding | -1.02 | 5.72E-05 | 1.46E-03 |
| ENSG00000188211 | NCR3LG1  | protein_coding | -0.82 | 5.73E-05 | 1.46E-03 |
| ENSG00000151320 | AKAP6    | protein_coding | 0.59  | 5.90E-05 | 1.50E-03 |
| ENSG00000170145 | SIK2     | protein_coding | 0.51  | 5.98E-05 | 1.52E-03 |
| ENSG00000120693 | SMAD9    | protein_coding | -0.68 | 6.01E-05 | 1.53E-03 |
| ENSG00000046604 | DSG2     | protein_coding | -0.76 | 6.06E-05 | 1.54E-03 |
| ENSG00000100503 | NIN      | protein_coding | 0.59  | 6.09E-05 | 1.54E-03 |
| ENSG00000181467 | RAP2B    | protein_coding | -0.64 | 6.11E-05 | 1.54E-03 |
| ENSG00000163584 | RPL22L1  | protein_coding | -0.75 | 6.17E-05 | 1.56E-03 |
| ENSG00000103489 | XYLT1    | protein_coding | -0.73 | 6.20E-05 | 1.56E-03 |
| ENSG00000143494 | VASH2    | protein_coding | -1.02 | 6.25E-05 | 1.57E-03 |
| ENSG00000114270 | COL7A1   | protein_coding | 1.35  | 6.28E-05 | 1.57E-03 |
| ENSG00000172201 | ID4      | protein_coding | -1.04 | 6.27E-05 | 1.57E-03 |
| ENSG00000174442 | ZWILCH   | protein_coding | -0.83 | 6.51E-05 | 1.63E-03 |
| ENSG00000136048 | DRAM1    | protein_coding | 0.89  | 6.55E-05 | 1.63E-03 |
| ENSG00000137177 | KIF13A   | protein_coding | 0.56  | 6.57E-05 | 1.63E-03 |
| ENSG00000239779 | WBP1     | protein_coding | 0.93  | 6.59E-05 | 1.64E-03 |

|                 |          |                |       |          |          |
|-----------------|----------|----------------|-------|----------|----------|
| ENSG00000178726 | THBD     | protein_coding | -1.04 | 6.63E-05 | 1.64E-03 |
| ENSG00000127863 | TNFRSF19 | protein_coding | -1.09 | 6.71E-05 | 1.66E-03 |
| ENSG00000119280 | C1orf198 | protein_coding | -0.86 | 6.75E-05 | 1.67E-03 |
| ENSG00000176714 | CCDC121  | protein_coding | -0.88 | 6.81E-05 | 1.68E-03 |
| ENSG00000186806 | VSIG10L  | protein_coding | 0.78  | 6.97E-05 | 1.72E-03 |
| ENSG00000158402 | CDC25C   | protein_coding | -0.77 | 7.04E-05 | 1.73E-03 |
| ENSG00000152749 | GPR180   | protein_coding | -0.74 | 7.06E-05 | 1.74E-03 |
| ENSG00000101746 | NOL4     | protein_coding | -1.29 | 7.09E-05 | 1.74E-03 |
| ENSG00000172927 | MYEOV    | protein_coding | -1.53 | 7.11E-05 | 1.74E-03 |
| ENSG00000094975 | SUCO     | protein_coding | -0.58 | 7.23E-05 | 1.77E-03 |
| ENSG00000078725 | BRINP1   | protein_coding | -0.97 | 7.31E-05 | 1.78E-03 |
| ENSG00000151632 | AKR1C2   | protein_coding | 1.24  | 7.31E-05 | 1.78E-03 |
| ENSG00000156218 | ADAMTSL3 | protein_coding | -0.58 | 7.40E-05 | 1.80E-03 |
| ENSG00000074695 | LMAN1    | protein_coding | -0.61 | 7.41E-05 | 1.80E-03 |
| ENSG00000023839 | ABCC2    | protein_coding | 0.76  | 7.54E-05 | 1.83E-03 |
| ENSG00000183196 | CHST6    | protein_coding | -0.77 | 7.54E-05 | 1.83E-03 |
| ENSG00000196247 | ZNF107   | protein_coding | -0.55 | 7.55E-05 | 1.83E-03 |
| ENSG00000136352 | NKX2-1   | protein_coding | 1.48  | 7.64E-05 | 1.85E-03 |
| ENSG00000187601 | MAGEH1   | protein_coding | -0.93 | 7.73E-05 | 1.86E-03 |
| ENSG00000148677 | ANKRD1   | protein_coding | -1.15 | 7.77E-05 | 1.87E-03 |
| ENSG00000006530 | AGK      | protein_coding | -0.47 | 7.85E-05 | 1.89E-03 |
| ENSG00000156042 | CFAP70   | protein_coding | 0.95  | 7.87E-05 | 1.89E-03 |
| ENSG00000153714 | LURAP1L  | protein_coding | 0.68  | 8.44E-05 | 2.02E-03 |
| ENSG00000163453 | IGFBP7   | protein_coding | 0.52  | 8.45E-05 | 2.02E-03 |
| ENSG00000108823 | SGCA     | protein_coding | 1.50  | 8.58E-05 | 2.04E-03 |
| ENSG00000173207 | CKS1B    | protein_coding | -0.60 | 8.57E-05 | 2.04E-03 |
| ENSG00000186205 | 1-Mar    | protein_coding | 0.90  | 8.58E-05 | 2.04E-03 |
| ENSG00000138639 | ARHGAP24 | protein_coding | 0.72  | 8.73E-05 | 2.07E-03 |
| ENSG00000136982 | DSCC1    | protein_coding | -0.84 | 8.79E-05 | 2.08E-03 |
| ENSG00000153214 | TMEM87B  | protein_coding | 0.83  | 8.90E-05 | 2.10E-03 |
| ENSG00000138674 | SEC31A   | protein_coding | -0.43 | 8.97E-05 | 2.11E-03 |
| ENSG00000159147 | DONSON   | protein_coding | -0.76 | 9.04E-05 | 2.13E-03 |
| ENSG00000124145 | SDC4     | protein_coding | -0.82 | 9.27E-05 | 2.17E-03 |
| ENSG00000126785 | RHOJ     | protein_coding | -2.02 | 9.26E-05 | 2.17E-03 |
| ENSG00000164109 | MAD2L1   | protein_coding | -0.61 | 9.27E-05 | 2.17E-03 |
| ENSG00000188691 | OR56A5   | protein_coding | -2.51 | 9.38E-05 | 2.19E-03 |
| ENSG00000135365 | PHF21A   | protein_coding | 0.52  | 9.41E-05 | 2.19E-03 |
| ENSG00000011566 | MAP4K3   | protein_coding | 0.57  | 9.67E-05 | 2.25E-03 |
| ENSG00000114455 | HHLA2    | protein_coding | -1.40 | 9.68E-05 | 2.25E-03 |
| ENSG00000075826 | SEC31B   | protein_coding | 0.95  | 9.70E-05 | 2.25E-03 |
| ENSG00000089847 | ANKRD24  | protein_coding | 1.13  | 9.79E-05 | 2.26E-03 |
| ENSG00000113263 | ITK      | protein_coding | -0.59 | 9.79E-05 | 2.26E-03 |
| ENSG00000203760 | CENPW    | protein_coding | -0.60 | 9.83E-05 | 2.27E-03 |
| ENSG00000011677 | GABRA3   | protein_coding | 1.07  | 9.93E-05 | 2.29E-03 |
| ENSG00000161395 | PGAP3    | protein_coding | 1.19  | 1.00E-04 | 2.30E-03 |
| ENSG00000109805 | NCAPG    | protein_coding | -0.65 | 1.01E-04 | 2.32E-03 |
| ENSG00000145882 | PCYOX1L  | protein_coding | 1.01  | 1.02E-04 | 2.33E-03 |
| ENSG00000185052 | SLC24A3  | protein_coding | -0.91 | 1.03E-04 | 2.36E-03 |
| ENSG00000105929 | ATP6V0A4 | protein_coding | -1.31 | 1.04E-04 | 2.38E-03 |
| ENSG00000170385 | SLC30A1  | protein_coding | -1.07 | 1.05E-04 | 2.39E-03 |
| ENSG00000087263 | OGFOD1   | protein_coding | -0.53 | 1.06E-04 | 2.43E-03 |
| ENSG00000154102 | C16orf74 | protein_coding | 1.18  | 1.07E-04 | 2.43E-03 |
| ENSG00000166130 | IKBIP    | protein_coding | -0.69 | 1.07E-04 | 2.43E-03 |
| ENSG00000172243 | CLEC7A   | protein_coding | 2.22  | 1.09E-04 | 2.47E-03 |
| ENSG00000183741 | CBX6     | protein_coding | 0.77  | 1.09E-04 | 2.47E-03 |
| ENSG00000130940 | CASZ1    | protein_coding | -0.78 | 1.09E-04 | 2.48E-03 |
| ENSG00000128245 | YWHAH    | protein_coding | -0.60 | 1.12E-04 | 2.53E-03 |
| ENSG00000178966 | RMI1     | protein_coding | -0.64 | 1.12E-04 | 2.53E-03 |
| ENSG00000073910 | FRY      | protein_coding | -0.88 | 1.13E-04 | 2.55E-03 |
| ENSG00000185559 | DLK1     | protein_coding | 1.04  | 1.14E-04 | 2.56E-03 |
| ENSG00000164125 | FAM198B  | protein_coding | -0.78 | 1.15E-04 | 2.58E-03 |
| ENSG00000179889 | PDXDC1   | protein_coding | -0.46 | 1.15E-04 | 2.58E-03 |
| ENSG00000163781 | TOPBP1   | protein_coding | -0.50 | 1.16E-04 | 2.60E-03 |
| ENSG00000118193 | KIF14    | protein_coding | -0.59 | 1.17E-04 | 2.62E-03 |
| ENSG00000070087 | PFN2     | protein_coding | -0.74 | 1.17E-04 | 2.62E-03 |

|                 |           |                |       |          |          |
|-----------------|-----------|----------------|-------|----------|----------|
| ENSG00000138646 | HERC5     | protein_coding | -0.78 | 1.19E-04 | 2.65E-03 |
| ENSG00000120756 | PLS1      | protein_coding | -1.09 | 1.20E-04 | 2.68E-03 |
| ENSG00000100380 | ST13      | protein_coding | -0.53 | 1.21E-04 | 2.68E-03 |
| ENSG00000116833 | NR5A2     | protein_coding | -1.19 | 1.21E-04 | 2.70E-03 |
| ENSG00000231925 | TAPBP     | protein_coding | 0.55  | 1.22E-04 | 2.72E-03 |
| ENSG00000054598 | FOXC1     | protein_coding | 0.66  | 1.23E-04 | 2.73E-03 |
| ENSG00000184371 | CSF1      | protein_coding | 0.57  | 1.23E-04 | 2.73E-03 |
| ENSG00000255690 | TRIL      | protein_coding | -1.08 | 1.25E-04 | 2.76E-03 |
| ENSG00000086848 | ALG9      | protein_coding | -1.13 | 1.26E-04 | 2.77E-03 |
| ENSG00000134531 | EMP1      | protein_coding | -0.54 | 1.26E-04 | 2.77E-03 |
| ENSG00000150977 | RILPL2    | protein_coding | 0.68  | 1.28E-04 | 2.81E-03 |
| ENSG00000165304 | MELK      | protein_coding | -0.65 | 1.30E-04 | 2.85E-03 |
| ENSG00000106034 | CPED1     | protein_coding | -0.58 | 1.31E-04 | 2.87E-03 |
| ENSG00000184845 | DRD1      | protein_coding | -1.66 | 1.32E-04 | 2.88E-03 |
| ENSG00000198826 | ARHGAP11  | protein_coding | -0.66 | 1.32E-04 | 2.88E-03 |
| ENSG00000178028 | DMAP1     | protein_coding | 0.58  | 1.32E-04 | 2.88E-03 |
| ENSG00000164715 | LMTK2     | protein_coding | 0.51  | 1.33E-04 | 2.88E-03 |
| ENSG00000176907 | C8orf4    | protein_coding | 1.09  | 1.33E-04 | 2.88E-03 |
| ENSG00000084636 | COL16A1   | protein_coding | 1.06  | 1.33E-04 | 2.89E-03 |
| ENSG00000197712 | FAM114A1  | protein_coding | -0.44 | 1.39E-04 | 3.01E-03 |
| ENSG00000148344 | PTGES     | protein_coding | 0.98  | 1.43E-04 | 3.09E-03 |
| ENSG00000163535 | SGO2      | protein_coding | -0.62 | 1.43E-04 | 3.09E-03 |
| ENSG00000184205 | TSPYL2    | protein_coding | 0.80  | 1.44E-04 | 3.10E-03 |
| ENSG00000143631 | FLG       | protein_coding | -2.44 | 1.45E-04 | 3.11E-03 |
| ENSG00000133138 | TBC1D8B   | protein_coding | -0.75 | 1.49E-04 | 3.20E-03 |
| ENSG00000131470 | PSMC3IP   | protein_coding | -0.55 | 1.52E-04 | 3.25E-03 |
| ENSG00000151893 | CACUL1    | protein_coding | -0.83 | 1.52E-04 | 3.25E-03 |
| ENSG00000112742 | TTK       | protein_coding | -0.59 | 1.53E-04 | 3.27E-03 |
| ENSG00000196782 | MAML3     | protein_coding | 0.70  | 1.54E-04 | 3.28E-03 |
| ENSG00000122203 | KIAA1191  | protein_coding | 0.55  | 1.58E-04 | 3.35E-03 |
| ENSG00000179431 | FJX1      | protein_coding | 1.13  | 1.58E-04 | 3.35E-03 |
| ENSG00000186318 | BACE1     | protein_coding | -0.65 | 1.58E-04 | 3.36E-03 |
| ENSG00000011465 | DCN       | protein_coding | 0.52  | 1.59E-04 | 3.36E-03 |
| ENSG00000166483 | WEE1      | protein_coding | -0.54 | 1.60E-04 | 3.37E-03 |
| ENSG00000205002 | AARD      | protein_coding | 1.01  | 1.60E-04 | 3.37E-03 |
| ENSG00000096060 | FKBP5     | protein_coding | 0.54  | 1.62E-04 | 3.41E-03 |
| ENSG00000100749 | VRK1      | protein_coding | -0.57 | 1.61E-04 | 3.41E-03 |
| ENSG00000135407 | AVIL      | protein_coding | 1.32  | 1.63E-04 | 3.44E-03 |
| ENSG00000177570 | SAMD12    | protein_coding | 0.59  | 1.65E-04 | 3.46E-03 |
| ENSG00000059588 | TARBP1    | protein_coding | -0.65 | 1.66E-04 | 3.47E-03 |
| ENSG00000130023 | ERMARD    | protein_coding | 0.51  | 1.66E-04 | 3.47E-03 |
| ENSG00000197774 | EME2      | protein_coding | 0.93  | 1.68E-04 | 3.53E-03 |
| ENSG00000198223 | CSF2RA    | protein_coding | -0.77 | 1.70E-04 | 3.54E-03 |
| ENSG00000138821 | SLC39A8   | protein_coding | -0.92 | 1.70E-04 | 3.55E-03 |
| ENSG00000155792 | DEPTOR    | protein_coding | 0.86  | 1.70E-04 | 3.55E-03 |
| ENSG00000162623 | TYW3      | protein_coding | 0.74  | 1.71E-04 | 3.55E-03 |
| ENSG00000204869 | IGFL4     | protein_coding | 1.47  | 1.71E-04 | 3.55E-03 |
| ENSG00000171223 | JUNB      | protein_coding | 1.34  | 1.72E-04 | 3.56E-03 |
| ENSG00000042832 | TG        | protein_coding | 1.30  | 1.74E-04 | 3.60E-03 |
| ENSG00000196735 | HLA-DQA1  | protein_coding | -1.79 | 1.74E-04 | 3.61E-03 |
| ENSG00000167637 | ZNF283    | protein_coding | -0.53 | 1.75E-04 | 3.62E-03 |
| ENSG00000018510 | AGPS      | protein_coding | -0.90 | 1.76E-04 | 3.63E-03 |
| ENSG00000168010 | ATG16L2   | protein_coding | 0.69  | 1.76E-04 | 3.63E-03 |
| ENSG00000163931 | TKT       | protein_coding | 0.88  | 1.76E-04 | 3.64E-03 |
| ENSG00000082196 | C1QTNF3   | protein_coding | -0.89 | 1.77E-04 | 3.65E-03 |
| ENSG00000135749 | PCNX2     | protein_coding | 0.64  | 1.78E-04 | 3.67E-03 |
| ENSG00000154760 | SLFN13    | protein_coding | -0.63 | 1.80E-04 | 3.69E-03 |
| ENSG00000141258 | SGSM2     | protein_coding | 0.86  | 1.81E-04 | 3.71E-03 |
| ENSG00000214114 | MYCBP     | protein_coding | -1.12 | 1.83E-04 | 3.75E-03 |
| ENSG00000165732 | DDX21     | protein_coding | -0.47 | 1.84E-04 | 3.76E-03 |
| ENSG00000106080 | FKBP14    | protein_coding | -0.83 | 1.85E-04 | 3.77E-03 |
| ENSG00000138814 | PPP3CA    | protein_coding | -0.71 | 1.87E-04 | 3.82E-03 |
| ENSG00000169908 | TM4SF1    | protein_coding | -0.54 | 1.88E-04 | 3.83E-03 |
| ENSG00000117069 | ST6GALNA4 | protein_coding | -0.97 | 1.88E-04 | 3.83E-03 |
| ENSG00000176472 | ZNF575    | protein_coding | 1.94  | 1.90E-04 | 3.87E-03 |



|                 |            |                |       |          |          |
|-----------------|------------|----------------|-------|----------|----------|
| ENSG00000095139 | ARCN1      | protein_coding | -0.45 | 1.91E-04 | 3.87E-03 |
| ENSG00000101955 | SRPX       | protein_coding | -0.52 | 1.91E-04 | 3.88E-03 |
| ENSG00000188175 | HEPACAM2   | protein_coding | 1.87  | 1.98E-04 | 4.00E-03 |
| ENSG00000127526 | SLC35E1    | protein_coding | -0.68 | 1.99E-04 | 4.01E-03 |
| ENSG00000196305 | IARS       | protein_coding | -0.45 | 1.99E-04 | 4.02E-03 |
| ENSG00000135535 | CD164      | protein_coding | -0.94 | 2.01E-04 | 4.04E-03 |
| ENSG00000140743 | CDR2       | protein_coding | -0.67 | 2.01E-04 | 4.04E-03 |
| ENSG00000205208 | C4orf46    | protein_coding | -0.69 | 2.01E-04 | 4.04E-03 |
| ENSG00000197977 | ELOVL2     | protein_coding | -0.78 | 2.04E-04 | 4.09E-03 |
| ENSG00000052802 | MSMO1      | protein_coding | -1.30 | 2.05E-04 | 4.11E-03 |
| ENSG00000133943 | C14orf159  | protein_coding | 0.62  | 2.05E-04 | 4.12E-03 |
| ENSG00000144504 | ANKMY1     | protein_coding | 0.65  | 2.07E-04 | 4.13E-03 |
| ENSG00000183283 | DAZAP2     | protein_coding | 0.72  | 2.07E-04 | 4.13E-03 |
| ENSG00000067225 | PKM        | protein_coding | 0.56  | 2.13E-04 | 4.24E-03 |
| ENSG00000077522 | ACTN2      | protein_coding | -0.78 | 2.13E-04 | 4.25E-03 |
| ENSG00000052795 | FNIP2      | protein_coding | -0.46 | 2.13E-04 | 4.25E-03 |
| ENSG00000114850 | SSR3       | protein_coding | -0.84 | 2.17E-04 | 4.31E-03 |
| ENSG00000131203 | IDO1       | protein_coding | 1.25  | 2.19E-04 | 4.35E-03 |
| ENSG00000147655 | RSPO2      | protein_coding | 1.13  | 2.21E-04 | 4.38E-03 |
| ENSG00000198056 | PRIM1      | protein_coding | -0.62 | 2.21E-04 | 4.38E-03 |
| ENSG00000092295 | TGM1       | protein_coding | -1.09 | 2.25E-04 | 4.42E-03 |
| ENSG00000100100 | PIK3IP1    | protein_coding | 1.69  | 2.24E-04 | 4.42E-03 |
| ENSG00000101846 | STS        | protein_coding | -0.64 | 2.24E-04 | 4.42E-03 |
| ENSG00000110911 | SLC11A2    | protein_coding | -0.60 | 2.25E-04 | 4.42E-03 |
| ENSG00000137103 | TMEM8B     | protein_coding | 1.04  | 2.25E-04 | 4.42E-03 |
| ENSG00000152270 | PDE3B      | protein_coding | -0.67 | 2.25E-04 | 4.43E-03 |
| ENSG00000102098 | SCML2      | protein_coding | -0.63 | 2.29E-04 | 4.48E-03 |
| ENSG00000102057 | KCND1      | protein_coding | 1.70  | 2.33E-04 | 4.57E-03 |
| ENSG00000157168 | NRG1       | protein_coding | 0.45  | 2.37E-04 | 4.63E-03 |
| ENSG00000184635 | ZNF93      | protein_coding | -0.52 | 2.37E-04 | 4.63E-03 |
| ENSG00000148229 | POLE3      | protein_coding | -0.44 | 2.38E-04 | 4.65E-03 |
| ENSG00000248713 | AC083902.2 | protein_coding | 1.99  | 2.41E-04 | 4.68E-03 |
| ENSG00000145451 | GLRA3      | protein_coding | -1.32 | 2.41E-04 | 4.69E-03 |
| ENSG00000162378 | ZYG11B     | protein_coding | 0.61  | 2.44E-04 | 4.74E-03 |
| ENSG00000204525 | HLA-C      | protein_coding | 0.47  | 2.44E-04 | 4.74E-03 |
| ENSG00000055813 | CCDC85A    | protein_coding | 1.11  | 2.46E-04 | 4.76E-03 |
| ENSG00000205268 | PDE7A      | protein_coding | -0.57 | 2.48E-04 | 4.80E-03 |
| ENSG00000059573 | ALDH18A1   | protein_coding | -0.49 | 2.51E-04 | 4.84E-03 |
| ENSG00000157600 | TMEM164    | protein_coding | -0.46 | 2.51E-04 | 4.84E-03 |
| ENSG00000196950 | SLC39A10   | protein_coding | -0.55 | 2.53E-04 | 4.87E-03 |
| ENSG00000002549 | LAP3       | protein_coding | -0.46 | 2.54E-04 | 4.87E-03 |
| ENSG00000188312 | CENPP      | protein_coding | -0.53 | 2.53E-04 | 4.87E-03 |
| ENSG00000124370 | MCEE       | protein_coding | -0.94 | 2.54E-04 | 4.88E-03 |
| ENSG00000156313 | RPGR       | protein_coding | -0.61 | 2.55E-04 | 4.89E-03 |
| ENSG00000164244 | PRRC1      | protein_coding | -0.57 | 2.59E-04 | 4.94E-03 |
| ENSG00000164292 | RHOBTB3    | protein_coding | -0.82 | 2.58E-04 | 4.94E-03 |
| ENSG00000169679 | BUB1       | protein_coding | -0.44 | 2.59E-04 | 4.94E-03 |
| ENSG00000134193 | REG4       | protein_coding | -1.71 | 2.62E-04 | 4.98E-03 |
| ENSG00000155657 | TTN        | protein_coding | -0.73 | 2.61E-04 | 4.98E-03 |
| ENSG00000002587 | HS3ST1     | protein_coding | -1.51 | 2.63E-04 | 4.99E-03 |
| ENSG00000169914 | OTUD3      | protein_coding | -0.58 | 2.63E-04 | 5.00E-03 |
| ENSG00000111252 | SH2B3      | protein_coding | -0.59 | 2.64E-04 | 5.00E-03 |
| ENSG00000099860 | GADD45B    | protein_coding | 0.94  | 2.67E-04 | 5.06E-03 |
| ENSG00000145358 | DDIT4L     | protein_coding | -1.26 | 2.70E-04 | 5.10E-03 |
| ENSG00000162004 | CCDC78     | protein_coding | 1.56  | 2.71E-04 | 5.11E-03 |
| ENSG00000198730 | CTR9       | protein_coding | -0.60 | 2.72E-04 | 5.13E-03 |
| ENSG00000140937 | CDH11      | protein_coding | -0.78 | 2.73E-04 | 5.14E-03 |
| ENSG00000049883 | PTCD2      | protein_coding | 0.48  | 2.74E-04 | 5.16E-03 |
| ENSG00000198911 | SREBF2     | protein_coding | -0.62 | 2.75E-04 | 5.17E-03 |
| ENSG00000247315 | ZCCHC3     | protein_coding | -0.62 | 2.81E-04 | 5.28E-03 |
| ENSG00000026559 | KCNG1      | protein_coding | -0.67 | 2.82E-04 | 5.29E-03 |
| ENSG00000099875 | MKNK2      | protein_coding | 1.02  | 2.84E-04 | 5.31E-03 |
| ENSG00000071242 | RPS6KA2    | protein_coding | 0.72  | 2.86E-04 | 5.34E-03 |
| ENSG00000164048 | ZNF589     | protein_coding | 0.57  | 2.87E-04 | 5.35E-03 |
| ENSG00000112195 | TREML2     | protein_coding | -1.83 | 2.87E-04 | 5.35E-03 |

|                 |          |                |       |          |          |
|-----------------|----------|----------------|-------|----------|----------|
| ENSG00000109674 | NEIL3    | protein_coding | -0.65 | 2.89E-04 | 5.38E-03 |
| ENSG00000142408 | CACNG8   | protein_coding | 0.90  | 2.91E-04 | 5.40E-03 |
| ENSG00000197147 | LRRRC8B  | protein_coding | -0.61 | 2.91E-04 | 5.40E-03 |
| ENSG00000128607 | KLHDC10  | protein_coding | -0.81 | 2.96E-04 | 5.50E-03 |
| ENSG00000119899 | SLC17A5  | protein_coding | -0.63 | 2.99E-04 | 5.55E-03 |
| ENSG00000134987 | WDR36    | protein_coding | -0.72 | 3.00E-04 | 5.55E-03 |
| ENSG00000176371 | ZSCAN2   | protein_coding | 0.75  | 3.00E-04 | 5.55E-03 |
| ENSG00000116830 | TTF2     | protein_coding | -0.43 | 3.01E-04 | 5.56E-03 |
| ENSG00000133103 | COG6     | protein_coding | -0.74 | 3.02E-04 | 5.57E-03 |
| ENSG00000063438 | AHRR     | protein_coding | 0.90  | 3.03E-04 | 5.58E-03 |
| ENSG00000206190 | ATP10A   | protein_coding | -0.47 | 3.06E-04 | 5.64E-03 |
| ENSG00000093217 | XYLB     | protein_coding | -0.59 | 3.08E-04 | 5.66E-03 |
| ENSG00000153157 | SYCP2L   | protein_coding | -0.68 | 3.08E-04 | 5.66E-03 |
| ENSG00000144355 | DLX1     | protein_coding | 0.53  | 3.13E-04 | 5.73E-03 |
| ENSG00000108821 | COL1A1   | protein_coding | 0.69  | 3.13E-04 | 5.74E-03 |
| ENSG00000143452 | HORMAD1  | protein_coding | 1.87  | 3.14E-04 | 5.74E-03 |
| ENSG00000076067 | RBMS2    | protein_coding | -0.49 | 3.14E-04 | 5.75E-03 |
| ENSG00000137824 | RMDN3    | protein_coding | -0.47 | 3.17E-04 | 5.78E-03 |
| ENSG00000156970 | BUB1B    | protein_coding | -0.48 | 3.17E-04 | 5.78E-03 |
| ENSG00000186395 | KRT10    | protein_coding | -0.79 | 3.17E-04 | 5.78E-03 |
| ENSG00000100592 | DAAM1    | protein_coding | -0.79 | 3.20E-04 | 5.82E-03 |
| ENSG00000140939 | NOL3     | protein_coding | 0.92  | 3.21E-04 | 5.82E-03 |
| ENSG00000144476 | ACKR3    | protein_coding | 1.33  | 3.21E-04 | 5.82E-03 |
| ENSG00000112029 | FBXO5    | protein_coding | -0.58 | 3.22E-04 | 5.84E-03 |
| ENSG00000125648 | SLC25A23 | protein_coding | 0.81  | 3.23E-04 | 5.84E-03 |
| ENSG00000061492 | WNT8A    | protein_coding | -1.13 | 3.28E-04 | 5.93E-03 |
| ENSG00000229474 | PATL2    | protein_coding | 0.77  | 3.29E-04 | 5.95E-03 |
| ENSG00000154229 | PRKCA    | protein_coding | 0.42  | 3.34E-04 | 6.03E-03 |
| ENSG00000125378 | BMP4     | protein_coding | 1.13  | 3.34E-04 | 6.03E-03 |
| ENSG00000214510 | SPINK13  | protein_coding | -0.75 | 3.41E-04 | 6.13E-03 |
| ENSG00000153933 | DGKE     | protein_coding | -0.67 | 3.43E-04 | 6.17E-03 |
| ENSG00000113845 | TIMMDC1  | protein_coding | 0.83  | 3.45E-04 | 6.19E-03 |
| ENSG00000197771 | MCMBP    | protein_coding | -0.44 | 3.52E-04 | 6.31E-03 |
| ENSG00000165480 | SKA3     | protein_coding | -0.67 | 3.53E-04 | 6.32E-03 |
| ENSG00000185015 | CA13     | protein_coding | -0.94 | 3.53E-04 | 6.32E-03 |
| ENSG00000126803 | HSPA2    | protein_coding | 1.14  | 3.55E-04 | 6.35E-03 |
| ENSG00000198824 | CHAMP1   | protein_coding | 0.48  | 3.57E-04 | 6.38E-03 |
| ENSG00000136854 | STXBP1   | protein_coding | 0.49  | 3.62E-04 | 6.45E-03 |
| ENSG00000140678 | ITGAX    | protein_coding | 1.54  | 3.64E-04 | 6.48E-03 |
| ENSG00000108395 | TRIM37   | protein_coding | 0.45  | 3.71E-04 | 6.59E-03 |
| ENSG00000196839 | ADA      | protein_coding | 0.74  | 3.71E-04 | 6.59E-03 |
| ENSG00000119922 | IFIT2    | protein_coding | -0.70 | 3.73E-04 | 6.60E-03 |
| ENSG00000149591 | TAGLN    | protein_coding | 1.22  | 3.74E-04 | 6.61E-03 |
| ENSG00000269343 | ZNF587B  | protein_coding | -0.48 | 3.74E-04 | 6.61E-03 |
| ENSG00000078687 | TNRC6C   | protein_coding | -0.52 | 3.74E-04 | 6.61E-03 |
| ENSG00000140465 | CYP1A1   | protein_coding | 1.30  | 3.77E-04 | 6.66E-03 |
| ENSG00000108819 | PPP1R9B  | protein_coding | 0.70  | 3.80E-04 | 6.69E-03 |
| ENSG00000204991 | SPIRE2   | protein_coding | 0.72  | 3.80E-04 | 6.69E-03 |
| ENSG00000138685 | FGF2     | protein_coding | 0.74  | 3.84E-04 | 6.73E-03 |
| ENSG00000144406 | UNC80    | protein_coding | -1.02 | 3.84E-04 | 6.73E-03 |
| ENSG00000147862 | NFIB     | protein_coding | 0.39  | 3.84E-04 | 6.73E-03 |
| ENSG00000168038 | ULK4     | protein_coding | -0.57 | 3.84E-04 | 6.73E-03 |
| ENSG00000171848 | RRM2     | protein_coding | -0.56 | 3.84E-04 | 6.73E-03 |
| ENSG00000147912 | FBXO10   | protein_coding | 0.81  | 3.85E-04 | 6.74E-03 |
| ENSG00000169764 | UGP2     | protein_coding | -0.67 | 3.87E-04 | 6.76E-03 |
| ENSG00000113916 | BCL6     | protein_coding | 0.61  | 3.88E-04 | 6.78E-03 |
| ENSG00000002834 | LASP1    | protein_coding | 0.57  | 3.90E-04 | 6.80E-03 |
| ENSG00000138311 | ZNF365   | protein_coding | 0.82  | 3.91E-04 | 6.81E-03 |
| ENSG00000054392 | HHAT     | protein_coding | 0.81  | 3.92E-04 | 6.81E-03 |
| ENSG00000148153 | INIP     | protein_coding | -0.70 | 3.93E-04 | 6.83E-03 |
| ENSG00000160753 | RUSC1    | protein_coding | -0.58 | 3.98E-04 | 6.92E-03 |
| ENSG00000186777 | ZNF732   | protein_coding | -0.68 | 4.03E-04 | 6.98E-03 |
| ENSG00000229676 | ZNF492   | protein_coding | -0.87 | 4.04E-04 | 7.00E-03 |
| ENSG00000137760 | ALKBH8   | protein_coding | -0.87 | 4.05E-04 | 7.00E-03 |
| ENSG00000042781 | USH2A    | protein_coding | 0.56  | 4.06E-04 | 7.01E-03 |

|                 |            |                |       |          |          |
|-----------------|------------|----------------|-------|----------|----------|
| ENSG00000146223 | RPL7L1     | protein_coding | -0.46 | 4.06E-04 | 7.02E-03 |
| ENSG00000164794 | KCNV1      | protein_coding | 1.52  | 4.07E-04 | 7.02E-03 |
| ENSG00000115159 | GPD2       | protein_coding | -0.55 | 4.10E-04 | 7.06E-03 |
| ENSG00000159231 | CBR3       | protein_coding | 0.90  | 4.10E-04 | 7.06E-03 |
| ENSG00000144677 | CTDSPL     | protein_coding | -0.72 | 4.11E-04 | 7.07E-03 |
| ENSG00000185112 | FAM43A     | protein_coding | 1.24  | 4.14E-04 | 7.12E-03 |
| ENSG00000051382 | PIK3CB     | protein_coding | -0.61 | 4.16E-04 | 7.14E-03 |
| ENSG00000136531 | SCN2A      | protein_coding | 0.92  | 4.19E-04 | 7.17E-03 |
| ENSG00000172007 | RAB33B     | protein_coding | -0.70 | 4.18E-04 | 7.17E-03 |
| ENSG00000160188 | RSPH1      | protein_coding | 1.54  | 4.22E-04 | 7.22E-03 |
| ENSG00000104626 | ERI1       | protein_coding | -0.62 | 4.27E-04 | 7.29E-03 |
| ENSG00000186298 | PPP1CC     | protein_coding | 1.00  | 4.28E-04 | 7.30E-03 |
| ENSG00000160685 | ZBTB7B     | protein_coding | 1.00  | 4.32E-04 | 7.36E-03 |
| ENSG00000172469 | MANEA      | protein_coding | -0.65 | 4.32E-04 | 7.36E-03 |
| ENSG00000160310 | PRMT2      | protein_coding | 0.43  | 4.33E-04 | 7.37E-03 |
| ENSG00000125864 | BFSP1      | protein_coding | 0.51  | 4.34E-04 | 7.37E-03 |
| ENSG00000148541 | FAM13C     | protein_coding | 1.86  | 4.36E-04 | 7.39E-03 |
| ENSG00000158169 | FANCC      | protein_coding | -0.56 | 4.36E-04 | 7.39E-03 |
| ENSG00000076351 | SLC46A1    | protein_coding | -0.65 | 4.40E-04 | 7.45E-03 |
| ENSG00000167964 | RAB26      | protein_coding | 1.53  | 4.41E-04 | 7.45E-03 |
| ENSG00000090989 | EXOC1      | protein_coding | -0.55 | 4.43E-04 | 7.48E-03 |
| ENSG00000119862 | LGALSL     | protein_coding | -0.55 | 4.44E-04 | 7.49E-03 |
| ENSG00000275023 | MLLT6      | protein_coding | 0.64  | 4.44E-04 | 7.49E-03 |
| ENSG00000277639 | AC007906.2 | protein_coding | 0.83  | 4.49E-04 | 7.56E-03 |
| ENSG00000020577 | SAMD4A     | protein_coding | -0.61 | 4.52E-04 | 7.58E-03 |
| ENSG00000112078 | KCTD20     | protein_coding | -0.44 | 4.51E-04 | 7.58E-03 |
| ENSG00000173848 | NET1       | protein_coding | -0.51 | 4.52E-04 | 7.58E-03 |
| ENSG00000163002 | NUP35      | protein_coding | -0.90 | 4.57E-04 | 7.66E-03 |
| ENSG00000124575 | HIST1H1D   | protein_coding | -0.91 | 4.61E-04 | 7.72E-03 |
| ENSG00000092964 | DPYSL2     | protein_coding | -0.48 | 4.63E-04 | 7.74E-03 |
| ENSG00000137673 | MMP7       | protein_coding | -0.78 | 4.65E-04 | 7.74E-03 |
| ENSG00000148053 | NTRK2      | protein_coding | 1.22  | 4.65E-04 | 7.74E-03 |
| ENSG00000159055 | MIS18A     | protein_coding | -0.53 | 4.65E-04 | 7.74E-03 |
| ENSG00000180998 | GPR137C    | protein_coding | -1.25 | 4.65E-04 | 7.74E-03 |
| ENSG00000118785 | SPP1       | protein_coding | -0.47 | 4.70E-04 | 7.80E-03 |
| ENSG00000166855 | CLPX       | protein_coding | 0.51  | 4.70E-04 | 7.80E-03 |
| ENSG00000139644 | TMBIM6     | protein_coding | 0.50  | 4.73E-04 | 7.84E-03 |
| ENSG00000008086 | CDKL5      | protein_coding | -0.66 | 4.75E-04 | 7.86E-03 |
| ENSG00000132294 | EFR3A      | protein_coding | -0.71 | 4.75E-04 | 7.87E-03 |
| ENSG00000008405 | CRY1       | protein_coding | -0.57 | 4.77E-04 | 7.88E-03 |
| ENSG00000156650 | KAT6B      | protein_coding | 0.55  | 4.78E-04 | 7.88E-03 |
| ENSG00000108515 | ENO3       | protein_coding | 0.66  | 4.79E-04 | 7.90E-03 |
| ENSG00000119523 | ALG2       | protein_coding | -0.57 | 4.85E-04 | 7.97E-03 |
| ENSG00000123643 | SLC36A1    | protein_coding | -0.59 | 4.85E-04 | 7.97E-03 |
| ENSG00000183508 | FAM46C     | protein_coding | 0.74  | 4.85E-04 | 7.97E-03 |
| ENSG00000121957 | GPSM2      | protein_coding | -0.55 | 4.88E-04 | 8.01E-03 |
| ENSG00000086289 | EPDR1      | protein_coding | -0.52 | 4.89E-04 | 8.02E-03 |
| ENSG00000125827 | TMX4       | protein_coding | -0.50 | 4.90E-04 | 8.03E-03 |
| ENSG00000125848 | FLRT3      | protein_coding | -1.43 | 4.92E-04 | 8.04E-03 |
| ENSG00000173614 | NMNAT1     | protein_coding | 0.88  | 4.95E-04 | 8.08E-03 |
| ENSG00000185989 | RASA3      | protein_coding | 0.60  | 4.95E-04 | 8.08E-03 |
| ENSG00000170421 | KRT8       | protein_coding | -1.13 | 4.99E-04 | 8.13E-03 |
| ENSG00000132432 | SEC61G     | protein_coding | -0.52 | 5.03E-04 | 8.19E-03 |
| ENSG00000157224 | CLDN12     | protein_coding | -0.92 | 5.03E-04 | 8.19E-03 |
| ENSG00000168404 | MLKL       | protein_coding | -0.61 | 5.04E-04 | 8.19E-03 |
| ENSG00000067955 | CBFB       | protein_coding | -0.52 | 5.08E-04 | 8.24E-03 |
| ENSG00000113282 | CLINT1     | protein_coding | -0.46 | 5.17E-04 | 8.38E-03 |
| ENSG00000196376 | SLC35F1    | protein_coding | -1.64 | 5.19E-04 | 8.40E-03 |
| ENSG00000177565 | TBL1XR1    | protein_coding | -0.68 | 5.21E-04 | 8.42E-03 |
| ENSG00000106692 | FKTN       | protein_coding | -0.52 | 5.25E-04 | 8.47E-03 |
| ENSG00000113273 | ARSB       | protein_coding | 0.44  | 5.33E-04 | 8.59E-03 |
| ENSG00000139626 | ITGB7      | protein_coding | 1.06  | 5.34E-04 | 8.60E-03 |
| ENSG00000149054 | ZNF215     | protein_coding | -0.79 | 5.35E-04 | 8.61E-03 |
| ENSG00000110844 | PRPF40B    | protein_coding | 0.77  | 5.36E-04 | 8.62E-03 |
| ENSG00000120868 | APAF1      | protein_coding | -0.50 | 5.38E-04 | 8.64E-03 |

|                 |            |                |       |          |          |
|-----------------|------------|----------------|-------|----------|----------|
| ENSG00000138660 | AP1AR      | protein_coding | 0.68  | 5.39E-04 | 8.64E-03 |
| ENSG00000151746 | BICD1      | protein_coding | 0.56  | 5.39E-04 | 8.64E-03 |
| ENSG00000246922 | UBAP1L     | protein_coding | 0.71  | 5.46E-04 | 8.73E-03 |
| ENSG00000115163 | CENPA      | protein_coding | -0.66 | 5.61E-04 | 8.96E-03 |
| ENSG00000205133 | TRIQQ      | protein_coding | -0.58 | 5.61E-04 | 8.96E-03 |
| ENSG00000197557 | TTC30A     | protein_coding | -0.83 | 5.62E-04 | 8.96E-03 |
| ENSG00000157483 | MYO1E      | protein_coding | -0.55 | 5.76E-04 | 9.16E-03 |
| ENSG00000162772 | ATF3       | protein_coding | 0.59  | 5.80E-04 | 9.20E-03 |
| ENSG00000182118 | FAM89A     | protein_coding | -1.07 | 5.80E-04 | 9.20E-03 |
| ENSG00000155846 | PPARGC1B   | protein_coding | 0.68  | 5.82E-04 | 9.22E-03 |
| ENSG00000182287 | AP1S2      | protein_coding | -0.67 | 5.83E-04 | 9.23E-03 |
| ENSG00000101310 | SEC23B     | protein_coding | -0.38 | 5.92E-04 | 9.37E-03 |
| ENSG00000274641 | HIST1H2BO  | protein_coding | -0.84 | 5.97E-04 | 9.44E-03 |
| ENSG00000165501 | LRR1       | protein_coding | -0.64 | 6.02E-04 | 9.50E-03 |
| ENSG00000196865 | NHLRC2     | protein_coding | -0.70 | 6.06E-04 | 9.56E-03 |
| ENSG00000066279 | ASPM       | protein_coding | -0.45 | 6.15E-04 | 9.68E-03 |
| ENSG00000077514 | POLD3      | protein_coding | -0.54 | 6.24E-04 | 9.79E-03 |
| ENSG00000155918 | RAET1L     | protein_coding | -1.50 | 6.24E-04 | 9.79E-03 |
| ENSG00000176407 | KCMF1      | protein_coding | -0.58 | 6.28E-04 | 9.84E-03 |
| ENSG00000115318 | LOXL3      | protein_coding | 0.76  | 6.31E-04 | 9.87E-03 |
| ENSG00000155592 | ZKSCAN2    | protein_coding | -0.54 | 6.35E-04 | 9.91E-03 |
| ENSG00000204186 | ZDBF2      | protein_coding | -0.59 | 6.34E-04 | 9.91E-03 |
| ENSG00000258461 | AC012651.1 | protein_coding | 1.68  | 6.37E-04 | 9.94E-03 |
| ENSG00000169093 | ASMTL      | protein_coding | 0.86  | 6.38E-04 | 9.95E-03 |
| ENSG00000118922 | KLF12      | protein_coding | -0.65 | 6.46E-04 | 1.00E-02 |
| ENSG00000041982 | TNC        | protein_coding | 0.90  | 6.47E-04 | 1.01E-02 |
| ENSG00000101624 | CEP76      | protein_coding | -0.63 | 6.49E-04 | 1.01E-02 |
| ENSG00000075945 | KIFAP3     | protein_coding | 0.42  | 6.51E-04 | 1.01E-02 |
| ENSG00000138756 | BMP2K      | protein_coding | 0.49  | 6.51E-04 | 1.01E-02 |
| ENSG00000119946 | CNNM1      | protein_coding | 0.71  | 6.55E-04 | 1.01E-02 |
| ENSG00000240891 | PLCXD2     | protein_coding | -0.79 | 6.58E-04 | 1.02E-02 |
| ENSG00000139291 | TMEM19     | protein_coding | 0.79  | 6.60E-04 | 1.02E-02 |
| ENSG00000188186 | LAMTOR4    | protein_coding | 0.75  | 6.60E-04 | 1.02E-02 |
| ENSG00000214189 | ZNF788     | protein_coding | -0.67 | 6.63E-04 | 1.02E-02 |
| ENSG00000142599 | RERE       | protein_coding | 0.53  | 6.65E-04 | 1.02E-02 |
| ENSG00000139178 | C1RL       | protein_coding | 0.92  | 6.66E-04 | 1.02E-02 |
| ENSG00000135643 | KCNMB4     | protein_coding | -1.74 | 6.68E-04 | 1.03E-02 |
| ENSG00000134308 | YWHAQ      | protein_coding | -0.50 | 6.72E-04 | 1.03E-02 |
| ENSG00000163508 | EOMES      | protein_coding | 1.21  | 6.71E-04 | 1.03E-02 |
| ENSG00000166833 | NAV2       | protein_coding | 0.89  | 6.71E-04 | 1.03E-02 |
| ENSG00000168610 | STAT3      | protein_coding | 0.43  | 6.72E-04 | 1.03E-02 |
| ENSG00000164930 | FZD6       | protein_coding | 0.53  | 6.82E-04 | 1.04E-02 |
| ENSG00000078304 | PPP2R5C    | protein_coding | -0.61 | 6.84E-04 | 1.04E-02 |
| ENSG00000111801 | BTN3A3     | protein_coding | 0.55  | 6.86E-04 | 1.05E-02 |
| ENSG00000117115 | PADI2      | protein_coding | 1.99  | 6.88E-04 | 1.05E-02 |
| ENSG00000105516 | DBP        | protein_coding | 1.09  | 6.91E-04 | 1.05E-02 |
| ENSG00000154258 | ABCA9      | protein_coding | 1.14  | 6.92E-04 | 1.05E-02 |
| ENSG00000137269 | LRRC1      | protein_coding | -0.69 | 7.01E-04 | 1.06E-02 |
| ENSG00000114948 | ADAM23     | protein_coding | -0.52 | 7.04E-04 | 1.07E-02 |
| ENSG00000168291 | PDHB       | protein_coding | -0.74 | 7.04E-04 | 1.07E-02 |
| ENSG00000172687 | ZNF738     | protein_coding | -0.71 | 7.05E-04 | 1.07E-02 |
| ENSG00000004139 | SARM1      | protein_coding | 1.22  | 7.18E-04 | 1.09E-02 |
| ENSG00000117143 | UAP1       | protein_coding | -0.49 | 7.18E-04 | 1.09E-02 |
| ENSG00000100625 | SIX4       | protein_coding | -0.45 | 7.22E-04 | 1.09E-02 |
| ENSG00000058404 | CAMK2B     | protein_coding | -0.70 | 7.26E-04 | 1.10E-02 |
| ENSG00000089685 | BIRC5      | protein_coding | -0.59 | 7.32E-04 | 1.10E-02 |
| ENSG00000176225 | RTTN       | protein_coding | -0.51 | 7.33E-04 | 1.10E-02 |
| ENSG00000196296 | ATP2A1     | protein_coding | 0.92  | 7.33E-04 | 1.10E-02 |
| ENSG00000065989 | PDE4A      | protein_coding | 0.95  | 7.37E-04 | 1.11E-02 |
| ENSG00000143815 | LBR        | protein_coding | -0.60 | 7.37E-04 | 1.11E-02 |
| ENSG00000158615 | PPP1R15B   | protein_coding | -0.50 | 7.38E-04 | 1.11E-02 |
| ENSG00000006607 | FARP2      | protein_coding | -0.46 | 7.46E-04 | 1.12E-02 |
| ENSG00000137203 | TFAP2A     | protein_coding | 0.45  | 7.46E-04 | 1.12E-02 |
| ENSG00000167325 | RRM1       | protein_coding | -0.46 | 7.52E-04 | 1.12E-02 |
| ENSG00000182628 | SKA2       | protein_coding | -0.69 | 7.55E-04 | 1.13E-02 |

|                 |          |                |       |          |          |
|-----------------|----------|----------------|-------|----------|----------|
| ENSG00000052723 | SIKE1    | protein_coding | -0.87 | 7.61E-04 | 1.13E-02 |
| ENSG00000130956 | HABP4    | protein_coding | 0.51  | 7.60E-04 | 1.13E-02 |
| ENSG00000138101 | DTNB     | protein_coding | 0.47  | 7.65E-04 | 1.14E-02 |
| ENSG00000136816 | TOR1B    | protein_coding | 0.54  | 7.67E-04 | 1.14E-02 |
| ENSG00000136960 | ENPP2    | protein_coding | -0.60 | 7.67E-04 | 1.14E-02 |
| ENSG00000114790 | ARHGEF26 | protein_coding | -0.80 | 7.70E-04 | 1.14E-02 |
| ENSG00000139266 | 9-Mar    | protein_coding | 0.79  | 7.73E-04 | 1.15E-02 |
| ENSG00000152527 | PLEKHH2  | protein_coding | -0.67 | 7.75E-04 | 1.15E-02 |
| ENSG00000129028 | THAP10   | protein_coding | -0.70 | 7.76E-04 | 1.15E-02 |
| ENSG00000196290 | NIF3L1   | protein_coding | -0.57 | 7.83E-04 | 1.16E-02 |
| ENSG00000147082 | CCNB3    | protein_coding | 0.63  | 7.86E-04 | 1.16E-02 |
| ENSG00000158125 | XDH      | protein_coding | -0.80 | 7.90E-04 | 1.17E-02 |
| ENSG00000187951 | ARHGAP11 | protein_coding | -0.46 | 7.90E-04 | 1.17E-02 |
| ENSG00000198157 | HMG5     | protein_coding | 0.81  | 7.94E-04 | 1.17E-02 |
| ENSG00000130653 | PNPLA7   | protein_coding | 0.96  | 7.96E-04 | 1.17E-02 |
| ENSG00000166557 | TMED3    | protein_coding | -0.53 | 7.99E-04 | 1.18E-02 |
| ENSG00000100003 | SEC14L2  | protein_coding | 0.71  | 8.02E-04 | 1.18E-02 |
| ENSG00000177879 | AP3S1    | protein_coding | -0.54 | 8.02E-04 | 1.18E-02 |
| ENSG00000186871 | ERCC6L   | protein_coding | -0.52 | 8.01E-04 | 1.18E-02 |
| ENSG00000104112 | SCG3     | protein_coding | -1.06 | 8.04E-04 | 1.18E-02 |
| ENSG00000198948 | MFAP3L   | protein_coding | 0.59  | 8.09E-04 | 1.18E-02 |
| ENSG00000180113 | TDRD6    | protein_coding | 0.75  | 8.15E-04 | 1.19E-02 |
| ENSG00000128829 | EIF2AK4  | protein_coding | 0.45  | 8.16E-04 | 1.19E-02 |
| ENSG00000051180 | RAD51    | protein_coding | -0.81 | 8.27E-04 | 1.21E-02 |
| ENSG00000114841 | DNAH1    | protein_coding | 0.91  | 8.27E-04 | 1.21E-02 |
| ENSG00000173166 | RAPH1    | protein_coding | -0.68 | 8.35E-04 | 1.22E-02 |
| ENSG00000204516 | MICB     | protein_coding | -0.81 | 8.36E-04 | 1.22E-02 |
| ENSG00000143409 | MINDY1   | protein_coding | 0.56  | 8.40E-04 | 1.22E-02 |
| ENSG00000164270 | HTR4     | protein_coding | -0.71 | 8.49E-04 | 1.23E-02 |
| ENSG00000189157 | FAM47E   | protein_coding | 1.37  | 8.56E-04 | 1.24E-02 |
| ENSG00000143344 | RGL1     | protein_coding | 0.56  | 8.60E-04 | 1.25E-02 |
| ENSG00000180611 | MB21D2   | protein_coding | -0.79 | 8.65E-04 | 1.25E-02 |
| ENSG00000119900 | OGFRL1   | protein_coding | 0.53  | 8.67E-04 | 1.25E-02 |
| ENSG00000117791 | 2-Mar    | protein_coding | 0.48  | 8.73E-04 | 1.26E-02 |
| ENSG00000197872 | FAM49A   | protein_coding | -1.23 | 8.72E-04 | 1.26E-02 |
| ENSG00000081985 | IL12RB2  | protein_coding | -1.80 | 8.76E-04 | 1.26E-02 |
| ENSG00000180979 | LRRRC57  | protein_coding | -0.51 | 8.82E-04 | 1.27E-02 |
| ENSG00000113361 | CDH6     | protein_coding | -1.54 | 8.83E-04 | 1.27E-02 |
| ENSG00000100345 | MYH9     | protein_coding | 0.70  | 8.86E-04 | 1.28E-02 |
| ENSG00000214941 | ZSWIM7   | protein_coding | 0.58  | 8.89E-04 | 1.28E-02 |
| ENSG00000132481 | TRIM47   | protein_coding | 0.76  | 8.96E-04 | 1.29E-02 |
| ENSG00000253159 | PCDHGA12 | protein_coding | 0.65  | 9.15E-04 | 1.31E-02 |
| ENSG00000101752 | MIB1     | protein_coding | 0.54  | 9.18E-04 | 1.31E-02 |
| ENSG00000134058 | CDK7     | protein_coding | -0.43 | 9.18E-04 | 1.31E-02 |
| ENSG00000140988 | RPS2     | protein_coding | 0.92  | 9.19E-04 | 1.31E-02 |
| ENSG00000153044 | CENPH    | protein_coding | -0.50 | 9.18E-04 | 1.31E-02 |
| ENSG00000131153 | GINS2    | protein_coding | -0.74 | 9.20E-04 | 1.31E-02 |
| ENSG00000113658 | SMAD5    | protein_coding | -0.61 | 9.28E-04 | 1.32E-02 |
| ENSG00000006468 | ETV1     | protein_coding | -0.84 | 9.32E-04 | 1.32E-02 |
| ENSG00000138658 | ZGRF1    | protein_coding | -0.50 | 9.31E-04 | 1.32E-02 |
| ENSG00000159658 | EFCAB14  | protein_coding | -0.39 | 9.42E-04 | 1.34E-02 |
| ENSG00000166979 | EVA1C    | protein_coding | 0.57  | 9.65E-04 | 1.37E-02 |
| ENSG00000169607 | CKAP2L   | protein_coding | -0.57 | 9.74E-04 | 1.38E-02 |
| ENSG00000198650 | TAT      | protein_coding | 1.84  | 9.75E-04 | 1.38E-02 |
| ENSG00000131669 | NINJ1    | protein_coding | 0.66  | 9.86E-04 | 1.39E-02 |
| ENSG00000100372 | SLC25A17 | protein_coding | -0.53 | 9.89E-04 | 1.40E-02 |
| ENSG00000102081 | FMR1     | protein_coding | 0.43  | 9.95E-04 | 1.40E-02 |
| ENSG00000162687 | KCNT2    | protein_coding | 0.79  | 9.94E-04 | 1.40E-02 |
| ENSG00000138942 | RNF185   | protein_coding | -0.58 | 9.98E-04 | 1.41E-02 |
| ENSG00000120915 | EPHX2    | protein_coding | 0.74  | 1.00E-03 | 1.41E-02 |
| ENSG00000135678 | CPM      | protein_coding | -0.68 | 1.01E-03 | 1.41E-02 |
| ENSG00000148120 | C9orf3   | protein_coding | 0.71  | 1.01E-03 | 1.41E-02 |
| ENSG00000166920 | C15orf48 | protein_coding | 0.63  | 1.00E-03 | 1.41E-02 |
| ENSG00000204116 | CHIC1    | protein_coding | 0.91  | 1.01E-03 | 1.41E-02 |
| ENSG00000153885 | KCTD15   | protein_coding | 0.75  | 1.01E-03 | 1.41E-02 |

|                 |          |                |       |          |          |
|-----------------|----------|----------------|-------|----------|----------|
| ENSG00000120837 | NFYB     | protein_coding | -0.47 | 1.04E-03 | 1.45E-02 |
| ENSG00000079691 | CARMIL1  | protein_coding | -0.56 | 1.04E-03 | 1.46E-02 |
| ENSG00000146072 | TNFRSF21 | protein_coding | 0.60  | 1.04E-03 | 1.46E-02 |
| ENSG00000130948 | HSD17B3  | protein_coding | 1.11  | 1.05E-03 | 1.47E-02 |
| ENSG00000135211 | TMEM60   | protein_coding | -0.86 | 1.07E-03 | 1.49E-02 |
| ENSG00000148483 | TMEM236  | protein_coding | 1.63  | 1.07E-03 | 1.49E-02 |
| ENSG00000174607 | UGT8     | protein_coding | -0.81 | 1.07E-03 | 1.49E-02 |
| ENSG00000135828 | RNASEL   | protein_coding | 0.49  | 1.08E-03 | 1.50E-02 |
| ENSG00000173163 | COMMD1   | protein_coding | 0.66  | 1.09E-03 | 1.51E-02 |
| ENSG00000134242 | PTPN22   | protein_coding | 0.79  | 1.09E-03 | 1.51E-02 |
| ENSG00000175497 | DPP10    | protein_coding | -1.07 | 1.09E-03 | 1.52E-02 |
| ENSG00000180694 | TMEM64   | protein_coding | -0.81 | 1.10E-03 | 1.52E-02 |
| ENSG00000144791 | LIMD1    | protein_coding | 0.52  | 1.10E-03 | 1.53E-02 |
| ENSG00000183826 | BTBD9    | protein_coding | -0.45 | 1.11E-03 | 1.53E-02 |
| ENSG00000035499 | DEPDC1B  | protein_coding | -0.55 | 1.11E-03 | 1.53E-02 |
| ENSG00000068912 | ERLEC1   | protein_coding | -0.59 | 1.11E-03 | 1.54E-02 |
| ENSG00000204217 | BMPR2    | protein_coding | -0.69 | 1.14E-03 | 1.57E-02 |
| ENSG00000151693 | ASAP2    | protein_coding | -0.44 | 1.15E-03 | 1.58E-02 |
| ENSG00000196338 | NLGN3    | protein_coding | 0.91  | 1.16E-03 | 1.59E-02 |
| ENSG00000173175 | ADCY5    | protein_coding | -1.85 | 1.17E-03 | 1.60E-02 |
| ENSG00000136158 | SPRY2    | protein_coding | -0.64 | 1.17E-03 | 1.61E-02 |
| ENSG00000177694 | NAALADL2 | protein_coding | 0.71  | 1.17E-03 | 1.61E-02 |
| ENSG00000226887 | ERVMER34 | protein_coding | -1.24 | 1.17E-03 | 1.61E-02 |
| ENSG00000089057 | SLC23A2  | protein_coding | 0.61  | 1.18E-03 | 1.61E-02 |
| ENSG00000169118 | CSNK1G1  | protein_coding | -0.47 | 1.18E-03 | 1.61E-02 |
| ENSG00000186017 | ZNF566   | protein_coding | -0.47 | 1.18E-03 | 1.61E-02 |
| ENSG00000214753 | HNRNPUL2 | protein_coding | -0.50 | 1.18E-03 | 1.61E-02 |
| ENSG00000085662 | AKR1B1   | protein_coding | 0.86  | 1.19E-03 | 1.62E-02 |
| ENSG00000162607 | USP1     | protein_coding | -0.60 | 1.19E-03 | 1.62E-02 |
| ENSG00000075975 | MKRN2    | protein_coding | -0.51 | 1.20E-03 | 1.63E-02 |
| ENSG00000091622 | PITPNM3  | protein_coding | -1.05 | 1.20E-03 | 1.63E-02 |
| ENSG00000179598 | PLD6     | protein_coding | -0.58 | 1.20E-03 | 1.63E-02 |
| ENSG00000006634 | DBF4     | protein_coding | -0.43 | 1.21E-03 | 1.64E-02 |
| ENSG00000168944 | CEP120   | protein_coding | -0.49 | 1.21E-03 | 1.64E-02 |
| ENSG00000250510 | GPR162   | protein_coding | 1.12  | 1.22E-03 | 1.65E-02 |
| ENSG00000122863 | CHST3    | protein_coding | -0.48 | 1.23E-03 | 1.66E-02 |
| ENSG00000107262 | BAG1     | protein_coding | 0.52  | 1.23E-03 | 1.67E-02 |
| ENSG00000106546 | AHR      | protein_coding | 0.81  | 1.25E-03 | 1.69E-02 |
| ENSG00000177548 | RABEP2   | protein_coding | 1.04  | 1.25E-03 | 1.69E-02 |
| ENSG00000186638 | KIF24    | protein_coding | -0.59 | 1.25E-03 | 1.69E-02 |
| ENSG00000136950 | ARPC5L   | protein_coding | -0.48 | 1.26E-03 | 1.69E-02 |
| ENSG00000080200 | CRYBG3   | protein_coding | -0.42 | 1.26E-03 | 1.69E-02 |
| ENSG00000186417 | GLDN     | protein_coding | 0.72  | 1.27E-03 | 1.71E-02 |
| ENSG00000182670 | TTC3     | protein_coding | 0.51  | 1.27E-03 | 1.71E-02 |
| ENSG00000137720 | C11orf1  | protein_coding | 0.85  | 1.28E-03 | 1.71E-02 |
| ENSG00000099822 | HCN2     | protein_coding | 0.72  | 1.28E-03 | 1.72E-02 |
| ENSG00000164305 | CASP3    | protein_coding | -0.61 | 1.28E-03 | 1.72E-02 |
| ENSG00000169122 | FAM110B  | protein_coding | 0.51  | 1.30E-03 | 1.74E-02 |
| ENSG00000063587 | ZNF275   | protein_coding | -0.49 | 1.30E-03 | 1.74E-02 |
| ENSG00000089195 | TRMT6    | protein_coding | -0.51 | 1.31E-03 | 1.75E-02 |
| ENSG00000170113 | NIPA1    | protein_coding | -0.57 | 1.31E-03 | 1.75E-02 |
| ENSG00000103248 | MTHFSD   | protein_coding | 0.56  | 1.31E-03 | 1.75E-02 |
| ENSG00000092820 | EZR      | protein_coding | -0.63 | 1.32E-03 | 1.76E-02 |
| ENSG00000147231 | CXorf57  | protein_coding | -0.63 | 1.33E-03 | 1.77E-02 |
| ENSG00000110492 | MDK      | protein_coding | 1.50  | 1.34E-03 | 1.78E-02 |
| ENSG00000136383 | ALPK3    | protein_coding | 1.07  | 1.34E-03 | 1.78E-02 |
| ENSG00000277258 | PCGF2    | protein_coding | 0.86  | 1.34E-03 | 1.78E-02 |
| ENSG00000254087 | LYN      | protein_coding | -0.47 | 1.35E-03 | 1.78E-02 |
| ENSG00000141441 | GAREM1   | protein_coding | -0.48 | 1.35E-03 | 1.79E-02 |
| ENSG00000106483 | SFRP4    | protein_coding | 1.26  | 1.36E-03 | 1.80E-02 |
| ENSG00000156802 | ATAD2    | protein_coding | -0.40 | 1.37E-03 | 1.81E-02 |
| ENSG00000145817 | YIPF5    | protein_coding | -0.79 | 1.38E-03 | 1.82E-02 |
| ENSG00000112531 | QKI      | protein_coding | -0.44 | 1.39E-03 | 1.83E-02 |
| ENSG00000107554 | DNMBP    | protein_coding | 0.41  | 1.40E-03 | 1.84E-02 |
| ENSG00000124588 | NQO2     | protein_coding | 0.42  | 1.40E-03 | 1.84E-02 |

|                 |          |                |       |          |          |
|-----------------|----------|----------------|-------|----------|----------|
| ENSG00000175745 | NR2F1    | protein_coding | 0.81  | 1.40E-03 | 1.84E-02 |
| ENSG00000145147 | SLIT2    | protein_coding | -0.91 | 1.41E-03 | 1.85E-02 |
| ENSG00000120137 | PANK3    | protein_coding | -0.68 | 1.41E-03 | 1.85E-02 |
| ENSG00000110906 | KCTD10   | protein_coding | 0.46  | 1.42E-03 | 1.86E-02 |
| ENSG00000103042 | SLC38A7  | protein_coding | 0.76  | 1.43E-03 | 1.86E-02 |
| ENSG00000184014 | DENND5A  | protein_coding | -0.46 | 1.43E-03 | 1.87E-02 |
| ENSG00000196208 | GREB1    | protein_coding | 1.07  | 1.43E-03 | 1.87E-02 |
| ENSG00000120328 | PCDHB12  | protein_coding | 1.37  | 1.44E-03 | 1.87E-02 |
| ENSG00000127083 | OMD      | protein_coding | 1.75  | 1.44E-03 | 1.88E-02 |
| ENSG00000155380 | SLC16A1  | protein_coding | -0.49 | 1.45E-03 | 1.88E-02 |
| ENSG00000197119 | SLC25A29 | protein_coding | 0.62  | 1.46E-03 | 1.89E-02 |
| ENSG00000122359 | ANXA11   | protein_coding | 0.48  | 1.46E-03 | 1.89E-02 |
| ENSG00000111057 | KRT18    | protein_coding | -0.75 | 1.47E-03 | 1.90E-02 |
| ENSG00000123091 | RNF11    | protein_coding | -0.66 | 1.47E-03 | 1.91E-02 |
| ENSG00000118495 | PLAGL1   | protein_coding | -0.72 | 1.47E-03 | 1.91E-02 |
| ENSG00000198961 | PJA2     | protein_coding | -0.51 | 1.48E-03 | 1.92E-02 |
| ENSG00000086598 | TMED2    | protein_coding | -0.55 | 1.50E-03 | 1.93E-02 |
| ENSG00000187094 | CCK      | protein_coding | 1.24  | 1.50E-03 | 1.93E-02 |
| ENSG00000130349 | C6orf203 | protein_coding | 0.49  | 1.51E-03 | 1.95E-02 |
| ENSG0000010270  | STARD3NL | protein_coding | -0.51 | 1.52E-03 | 1.95E-02 |
| ENSG00000130783 | CCDC62   | protein_coding | 1.21  | 1.52E-03 | 1.95E-02 |
| ENSG00000159871 | LYPD5    | protein_coding | -1.39 | 1.52E-03 | 1.95E-02 |
| ENSG00000075391 | RASAL2   | protein_coding | -0.46 | 1.52E-03 | 1.96E-02 |
| ENSG00000116747 | TROVE2   | protein_coding | -0.74 | 1.52E-03 | 1.96E-02 |
| ENSG00000135298 | ADGRB3   | protein_coding | -0.81 | 1.52E-03 | 1.96E-02 |
| ENSG00000175376 | EIF1AD   | protein_coding | -0.40 | 1.53E-03 | 1.96E-02 |
| ENSG00000102978 | POLR2C   | protein_coding | -0.42 | 1.53E-03 | 1.97E-02 |
| ENSG00000115840 | SLC25A12 | protein_coding | 0.44  | 1.54E-03 | 1.97E-02 |
| ENSG00000115325 | DOK1     | protein_coding | 0.86  | 1.56E-03 | 2.00E-02 |
| ENSG00000106261 | ZKSCAN1  | protein_coding | 0.41  | 1.56E-03 | 2.00E-02 |
| ENSG00000160094 | ZNF362   | protein_coding | 0.74  | 1.57E-03 | 2.01E-02 |
| ENSG00000162104 | ADCY9    | protein_coding | 0.45  | 1.58E-03 | 2.01E-02 |
| ENSG00000173451 | THAP2    | protein_coding | -0.84 | 1.58E-03 | 2.01E-02 |
| ENSG00000169231 | THBS3    | protein_coding | 1.14  | 1.58E-03 | 2.01E-02 |
| ENSG00000168530 | MYL1     | protein_coding | -0.89 | 1.58E-03 | 2.02E-02 |
| ENSG00000115946 | PNO1     | protein_coding | -0.48 | 1.59E-03 | 2.02E-02 |
| ENSG00000109814 | UGDH     | protein_coding | -0.58 | 1.59E-03 | 2.02E-02 |
| ENSG00000153048 | CARHSP1  | protein_coding | 0.73  | 1.60E-03 | 2.03E-02 |
| ENSG00000198087 | CD2AP    | protein_coding | -0.58 | 1.61E-03 | 2.04E-02 |
| ENSG00000196776 | CD47     | protein_coding | -0.56 | 1.61E-03 | 2.04E-02 |
| ENSG00000101447 | FAM83D   | protein_coding | -0.44 | 1.62E-03 | 2.04E-02 |
| ENSG00000158715 | SLC45A3  | protein_coding | -1.08 | 1.62E-03 | 2.04E-02 |
| ENSG00000188610 | FAM72B   | protein_coding | -0.72 | 1.62E-03 | 2.05E-02 |
| ENSG00000174013 | FBXO45   | protein_coding | -0.59 | 1.63E-03 | 2.06E-02 |
| ENSG00000136444 | RSAD1    | protein_coding | 0.61  | 1.64E-03 | 2.06E-02 |
| ENSG00000164684 | ZNF704   | protein_coding | 0.68  | 1.65E-03 | 2.08E-02 |
| ENSG00000181444 | ZNF467   | protein_coding | 1.03  | 1.66E-03 | 2.09E-02 |
| ENSG00000168411 | RFWD3    | protein_coding | -0.41 | 1.67E-03 | 2.09E-02 |
| ENSG00000198743 | SLC5A3   | protein_coding | 1.07  | 1.67E-03 | 2.09E-02 |
| ENSG0000014138  | POLA2    | protein_coding | -0.55 | 1.67E-03 | 2.10E-02 |
| ENSG00000205336 | ADGRG1   | protein_coding | 1.05  | 1.68E-03 | 2.10E-02 |
| ENSG00000121064 | SCPEP1   | protein_coding | 0.48  | 1.68E-03 | 2.10E-02 |
| ENSG00000143502 | SUSD4    | protein_coding | 1.27  | 1.68E-03 | 2.10E-02 |
| ENSG00000163110 | PDLIM5   | protein_coding | -0.75 | 1.70E-03 | 2.12E-02 |
| ENSG00000081803 | CADPS2   | protein_coding | -0.52 | 1.71E-03 | 2.13E-02 |
| ENSG00000175322 | ZNF519   | protein_coding | -0.52 | 1.71E-03 | 2.13E-02 |
| ENSG00000146143 | PRIM2    | protein_coding | -0.46 | 1.72E-03 | 2.14E-02 |
| ENSG00000196159 | FAT4     | protein_coding | 0.52  | 1.72E-03 | 2.14E-02 |
| ENSG00000122512 | PMS2     | protein_coding | 0.49  | 1.72E-03 | 2.14E-02 |
| ENSG00000151729 | SLC25A4  | protein_coding | -0.52 | 1.73E-03 | 2.15E-02 |
| ENSG00000204304 | PBX2     | protein_coding | 0.44  | 1.73E-03 | 2.15E-02 |
| ENSG00000143333 | RGS16    | protein_coding | -0.84 | 1.74E-03 | 2.15E-02 |
| ENSG00000196233 | LCOR     | protein_coding | 0.43  | 1.75E-03 | 2.16E-02 |
| ENSG00000181007 | ZFP82    | protein_coding | -1.11 | 1.76E-03 | 2.18E-02 |
| ENSG00000067066 | SP100    | protein_coding | 0.44  | 1.78E-03 | 2.21E-02 |

|                 |          |                |       |          |          |
|-----------------|----------|----------------|-------|----------|----------|
| ENSG00000185404 | SP140L   | protein_coding | 0.44  | 1.80E-03 | 2.22E-02 |
| ENSG00000123485 | HJURP    | protein_coding | -0.47 | 1.81E-03 | 2.22E-02 |
| ENSG00000188783 | PRELP    | protein_coding | -0.80 | 1.80E-03 | 2.22E-02 |
| ENSG00000111581 | NUP107   | protein_coding | -0.38 | 1.84E-03 | 2.26E-02 |
| ENSG00000158296 | SLC13A3  | protein_coding | 0.74  | 1.84E-03 | 2.27E-02 |
| ENSG00000165661 | QSOX2    | protein_coding | -0.52 | 1.86E-03 | 2.28E-02 |
| ENSG00000198856 | OSTC     | protein_coding | -0.82 | 1.86E-03 | 2.28E-02 |
| ENSG00000049449 | RCN1     | protein_coding | -0.70 | 1.87E-03 | 2.29E-02 |
| ENSG00000108799 | EZH1     | protein_coding | 0.62  | 1.87E-03 | 2.29E-02 |
| ENSG00000151151 | IPMK     | protein_coding | -0.82 | 1.88E-03 | 2.30E-02 |
| ENSG00000151117 | TMEM86A  | protein_coding | 0.71  | 1.90E-03 | 2.32E-02 |
| ENSG00000170965 | PLAC1    | protein_coding | -0.92 | 1.90E-03 | 2.32E-02 |
| ENSG00000111445 | RFC5     | protein_coding | -0.51 | 1.91E-03 | 2.33E-02 |
| ENSG00000150394 | CDH8     | protein_coding | -0.55 | 1.92E-03 | 2.33E-02 |
| ENSG00000124641 | MED20    | protein_coding | -0.56 | 1.92E-03 | 2.34E-02 |
| ENSG00000167767 | KRT80    | protein_coding | -0.72 | 1.93E-03 | 2.35E-02 |
| ENSG00000126524 | SBDS     | protein_coding | -0.50 | 1.94E-03 | 2.35E-02 |
| ENSG00000186314 | PRELID2  | protein_coding | -0.49 | 1.94E-03 | 2.36E-02 |
| ENSG00000111653 | ING4     | protein_coding | 0.65  | 1.95E-03 | 2.37E-02 |
| ENSG00000124541 | RRP36    | protein_coding | 0.40  | 1.95E-03 | 2.37E-02 |
| ENSG00000159217 | IGF2BP1  | protein_coding | -0.34 | 1.95E-03 | 2.37E-02 |
| ENSG00000119787 | ATL2     | protein_coding | -0.56 | 1.96E-03 | 2.37E-02 |
| ENSG00000197608 | ZNF841   | protein_coding | -0.40 | 1.97E-03 | 2.38E-02 |
| ENSG00000237441 | RGL2     | protein_coding | 1.11  | 1.96E-03 | 2.38E-02 |
| ENSG00000099204 | ABLIM1   | protein_coding | -0.41 | 1.99E-03 | 2.40E-02 |
| ENSG00000271601 | LIX1L    | protein_coding | 0.58  | 1.99E-03 | 2.40E-02 |
| ENSG00000182934 | SRPRA    | protein_coding | -0.37 | 2.00E-03 | 2.41E-02 |
| ENSG00000064042 | LIMCH1   | protein_coding | -0.49 | 2.02E-03 | 2.43E-02 |
| ENSG00000155749 | ALS2CR12 | protein_coding | 0.94  | 2.03E-03 | 2.44E-02 |
| ENSG00000108559 | NUP88    | protein_coding | -0.43 | 2.05E-03 | 2.46E-02 |
| ENSG00000109452 | INPP4B   | protein_coding | -0.40 | 2.06E-03 | 2.46E-02 |
| ENSG00000081923 | ATP8B1   | protein_coding | 0.52  | 2.07E-03 | 2.48E-02 |
| ENSG00000197312 | DDI2     | protein_coding | -0.39 | 2.08E-03 | 2.49E-02 |
| ENSG00000167193 | CRK      | protein_coding | 0.47  | 2.08E-03 | 2.49E-02 |
| ENSG00000100564 | PIGH     | protein_coding | -0.81 | 2.11E-03 | 2.52E-02 |
| ENSG00000110852 | CLEC2B   | protein_coding | 0.42  | 2.12E-03 | 2.52E-02 |
| ENSG00000135913 | USP37    | protein_coding | -0.55 | 2.13E-03 | 2.54E-02 |
| ENSG00000163577 | EIF5A2   | protein_coding | -0.47 | 2.14E-03 | 2.55E-02 |
| ENSG00000104432 | IL7      | protein_coding | -1.37 | 2.16E-03 | 2.57E-02 |
| ENSG00000130449 | ZSWIM6   | protein_coding | -0.59 | 2.17E-03 | 2.58E-02 |
| ENSG00000128284 | APOL3    | protein_coding | 0.74  | 2.18E-03 | 2.59E-02 |
| ENSG00000005108 | THSD7A   | protein_coding | 0.46  | 2.18E-03 | 2.59E-02 |
| ENSG00000158092 | NCK1     | protein_coding | -0.59 | 2.19E-03 | 2.60E-02 |
| ENSG00000180667 | YOD1     | protein_coding | -0.61 | 2.20E-03 | 2.60E-02 |
| ENSG00000086717 | PPEF1    | protein_coding | -0.61 | 2.21E-03 | 2.62E-02 |
| ENSG00000128731 | HERC2    | protein_coding | -0.33 | 2.23E-03 | 2.64E-02 |
| ENSG00000165997 | ARL5B    | protein_coding | -0.73 | 2.24E-03 | 2.65E-02 |
| ENSG00000197930 | ERO1A    | protein_coding | -0.61 | 2.26E-03 | 2.67E-02 |
| ENSG00000108094 | CUL2     | protein_coding | -0.61 | 2.27E-03 | 2.67E-02 |
| ENSG00000040731 | CDH10    | protein_coding | -0.94 | 2.27E-03 | 2.68E-02 |
| ENSG00000105926 | MPP6     | protein_coding | -0.54 | 2.27E-03 | 2.68E-02 |
| ENSG00000165807 | PPP1R36  | protein_coding | 1.00  | 2.28E-03 | 2.68E-02 |
| ENSG00000183765 | CHEK2    | protein_coding | -0.43 | 2.29E-03 | 2.69E-02 |
| ENSG00000006459 | KDM7A    | protein_coding | -0.47 | 2.31E-03 | 2.71E-02 |
| ENSG00000205726 | ITSN1    | protein_coding | -0.43 | 2.31E-03 | 2.71E-02 |
| ENSG00000100577 | GSTZ1    | protein_coding | 0.58  | 2.33E-03 | 2.73E-02 |
| ENSG00000167588 | GPD1     | protein_coding | 0.99  | 2.33E-03 | 2.73E-02 |
| ENSG00000043143 | JADE2    | protein_coding | 0.65  | 2.34E-03 | 2.73E-02 |
| ENSG00000100023 | PPIL2    | protein_coding | 0.51  | 2.34E-03 | 2.73E-02 |
| ENSG00000065000 | AP3D1    | protein_coding | 0.72  | 2.34E-03 | 2.74E-02 |
| ENSG00000103591 | AAGAB    | protein_coding | 0.40  | 2.34E-03 | 2.74E-02 |
| ENSG00000156052 | GNAQ     | protein_coding | -0.59 | 2.36E-03 | 2.75E-02 |
| ENSG00000149636 | DSN1     | protein_coding | -0.56 | 2.36E-03 | 2.76E-02 |
| ENSG00000111832 | RWDD1    | protein_coding | 0.44  | 2.38E-03 | 2.77E-02 |
| ENSG00000012963 | UBR7     | protein_coding | -0.52 | 2.39E-03 | 2.78E-02 |



|                 |          |                |       |          |          |
|-----------------|----------|----------------|-------|----------|----------|
| ENSG00000135148 | TRAFD1   | protein_coding | 0.43  | 2.39E-03 | 2.78E-02 |
| ENSG00000198786 | MT-ND5   | protein_coding | 0.68  | 2.39E-03 | 2.78E-02 |
| ENSG00000198888 | MT-ND1   | protein_coding | 0.48  | 2.39E-03 | 2.78E-02 |
| ENSG00000144395 | CCDC150  | protein_coding | -0.46 | 2.40E-03 | 2.78E-02 |
| ENSG00000155897 | ADCY8    | protein_coding | -1.17 | 2.40E-03 | 2.79E-02 |
| ENSG00000166963 | MAP1A    | protein_coding | 0.82  | 2.41E-03 | 2.80E-02 |
| ENSG00000085377 | PREP     | protein_coding | -0.43 | 2.44E-03 | 2.83E-02 |
| ENSG00000173599 | PC       | protein_coding | 0.71  | 2.47E-03 | 2.85E-02 |
| ENSG00000115758 | ODC1     | protein_coding | -0.49 | 2.48E-03 | 2.86E-02 |
| ENSG00000101557 | USP14    | protein_coding | -0.71 | 2.49E-03 | 2.88E-02 |
| ENSG00000096063 | SRPK1    | protein_coding | -0.38 | 2.50E-03 | 2.88E-02 |
| ENSG00000115539 | PDCL3    | protein_coding | 0.48  | 2.52E-03 | 2.90E-02 |
| ENSG00000198719 | DLL1     | protein_coding | 1.68  | 2.52E-03 | 2.90E-02 |
| ENSG00000170412 | GPRC5C   | protein_coding | 0.68  | 2.53E-03 | 2.91E-02 |
| ENSG00000151748 | SAV1     | protein_coding | -0.64 | 2.54E-03 | 2.92E-02 |
| ENSG00000244694 | PTCHD4   | protein_coding | 0.71  | 2.54E-03 | 2.92E-02 |
| ENSG00000205221 | VIT      | protein_coding | 0.65  | 2.55E-03 | 2.92E-02 |
| ENSG00000119906 | SLF2     | protein_coding | -0.43 | 2.56E-03 | 2.93E-02 |
| ENSG00000092421 | SEMA6A   | protein_coding | -0.63 | 2.56E-03 | 2.93E-02 |
| ENSG00000087586 | AURKA    | protein_coding | -0.35 | 2.60E-03 | 2.96E-02 |
| ENSG00000134470 | IL15RA   | protein_coding | 0.74  | 2.60E-03 | 2.96E-02 |
| ENSG00000169905 | TOR1AIP2 | protein_coding | 0.35  | 2.60E-03 | 2.96E-02 |
| ENSG00000197568 | HHLA3    | protein_coding | 0.58  | 2.61E-03 | 2.96E-02 |
| ENSG00000197558 | SSPO     | protein_coding | 1.01  | 2.63E-03 | 2.98E-02 |
| ENSG00000124766 | SOX4     | protein_coding | 0.53  | 2.63E-03 | 2.99E-02 |
| ENSG00000131351 | HAUS8    | protein_coding | -0.48 | 2.66E-03 | 3.01E-02 |
| ENSG00000135299 | ANKRD6   | protein_coding | -0.54 | 2.66E-03 | 3.01E-02 |
| ENSG00000152078 | TMEM56   | protein_coding | -0.54 | 2.67E-03 | 3.02E-02 |
| ENSG00000186472 | PCLO     | protein_coding | -0.46 | 2.66E-03 | 3.02E-02 |
| ENSG00000117650 | NEK2     | protein_coding | -0.40 | 2.67E-03 | 3.02E-02 |
| ENSG00000135185 | TMEM243  | protein_coding | -0.73 | 2.69E-03 | 3.03E-02 |
| ENSG00000155903 | RASA2    | protein_coding | -0.62 | 2.69E-03 | 3.04E-02 |
| ENSG00000078018 | MAP2     | protein_coding | 0.42  | 2.70E-03 | 3.04E-02 |
| ENSG00000169252 | ADRB2    | protein_coding | 0.44  | 2.70E-03 | 3.05E-02 |
| ENSG00000123405 | NFE2     | protein_coding | 1.35  | 2.71E-03 | 3.05E-02 |
| ENSG00000147488 | ST18     | protein_coding | 0.96  | 2.73E-03 | 3.07E-02 |
| ENSG00000169446 | MMGT1    | protein_coding | -0.55 | 2.77E-03 | 3.12E-02 |
| ENSG00000179295 | PTPN11   | protein_coding | -0.35 | 2.78E-03 | 3.12E-02 |
| ENSG00000119977 | TCTN3    | protein_coding | -0.58 | 2.79E-03 | 3.13E-02 |
| ENSG00000105991 | HOXA1    | protein_coding | -0.66 | 2.80E-03 | 3.14E-02 |
| ENSG00000104643 | MTMR9    | protein_coding | -0.60 | 2.81E-03 | 3.15E-02 |
| ENSG00000103404 | USP31    | protein_coding | -0.36 | 2.82E-03 | 3.16E-02 |
| ENSG00000112183 | RBM24    | protein_coding | -1.07 | 2.83E-03 | 3.17E-02 |
| ENSG00000186300 | ZNF555   | protein_coding | 0.50  | 2.83E-03 | 3.17E-02 |
| ENSG00000188483 | IER5L    | protein_coding | 0.92  | 2.83E-03 | 3.17E-02 |
| ENSG00000168300 | PCMTD1   | protein_coding | 0.57  | 2.84E-03 | 3.17E-02 |
| ENSG00000116906 | GNPAT    | protein_coding | -0.38 | 2.84E-03 | 3.17E-02 |
| ENSG00000147174 | GCNA     | protein_coding | 0.82  | 2.86E-03 | 3.18E-02 |
| ENSG00000189045 | ANKDD1B  | protein_coding | 1.18  | 2.86E-03 | 3.19E-02 |
| ENSG00000090975 | PITPNM2  | protein_coding | 0.67  | 2.89E-03 | 3.21E-02 |
| ENSG00000153066 | TXNDC11  | protein_coding | -0.47 | 2.91E-03 | 3.23E-02 |
| ENSG00000220205 | VAMP2    | protein_coding | 0.64  | 2.91E-03 | 3.23E-02 |
| ENSG00000159167 | STC1     | protein_coding | 0.42  | 2.92E-03 | 3.24E-02 |
| ENSG00000138411 | HECW2    | protein_coding | 0.59  | 2.93E-03 | 3.25E-02 |
| ENSG00000157111 | TMEM171  | protein_coding | 1.44  | 2.94E-03 | 3.26E-02 |
| ENSG00000162927 | PUS10    | protein_coding | 0.73  | 2.94E-03 | 3.26E-02 |
| ENSG00000177383 | MAGEF1   | protein_coding | -0.54 | 2.96E-03 | 3.28E-02 |
| ENSG00000137692 | DCUN1D5  | protein_coding | -0.67 | 2.98E-03 | 3.29E-02 |
| ENSG00000163930 | BAP1     | protein_coding | 0.83  | 2.98E-03 | 3.30E-02 |
| ENSG00000138326 | RPS24    | protein_coding | 0.37  | 2.99E-03 | 3.30E-02 |
| ENSG00000156467 | UQCRB    | protein_coding | 0.46  | 3.01E-03 | 3.32E-02 |
| ENSG00000144366 | GULP1    | protein_coding | 0.57  | 3.05E-03 | 3.36E-02 |
| ENSG00000121413 | ZSCAN18  | protein_coding | 0.79  | 3.07E-03 | 3.38E-02 |
| ENSG00000121621 | KIF18A   | protein_coding | -0.54 | 3.10E-03 | 3.42E-02 |
| ENSG00000137478 | FCHSD2   | protein_coding | 0.42  | 3.11E-03 | 3.43E-02 |

|                  |            |                |       |          |          |
|------------------|------------|----------------|-------|----------|----------|
| ENSG00000179104  | TMTC2      | protein_coding | -0.61 | 3.12E-03 | 3.43E-02 |
| ENSG00000157456  | CCNB2      | protein_coding | -0.41 | 3.13E-03 | 3.43E-02 |
| ENSG00000242247  | ARFGAP3    | protein_coding | -0.39 | 3.14E-03 | 3.44E-02 |
| ENSG00000173120  | KDM2A      | protein_coding | -0.33 | 3.15E-03 | 3.45E-02 |
| ENSG00000170802  | FOXN2      | protein_coding | 0.44  | 3.15E-03 | 3.46E-02 |
| ENSG00000086619  | ERO1B      | protein_coding | -0.67 | 3.16E-03 | 3.46E-02 |
| ENSG00000123612  | ACVR1C     | protein_coding | -0.84 | 3.17E-03 | 3.48E-02 |
| ENSG00000115232  | ITGA4      | protein_coding | 0.75  | 3.18E-03 | 3.48E-02 |
| ENSG00000138443  | ABI2       | protein_coding | 0.57  | 3.18E-03 | 3.48E-02 |
| ENSG00000170144  | HNRNPA3    | protein_coding | -0.45 | 3.18E-03 | 3.48E-02 |
| ENSG00000172954  | LCLAT1     | protein_coding | -0.75 | 3.18E-03 | 3.48E-02 |
| ENSG00000161010  | MRNIP      | protein_coding | 0.46  | 3.22E-03 | 3.51E-02 |
| ENSG00000070718  | AP3M2      | protein_coding | 0.39  | 3.24E-03 | 3.52E-02 |
| ENSG00000106688  | SLC1A1     | protein_coding | -0.66 | 3.23E-03 | 3.52E-02 |
| ENSG00000145780  | FEM1C      | protein_coding | -0.53 | 3.23E-03 | 3.52E-02 |
| ENSG00000147454  | SLC25A37   | protein_coding | -0.41 | 3.23E-03 | 3.52E-02 |
| ENSG00000153558  | FBXL2      | protein_coding | -0.48 | 3.24E-03 | 3.52E-02 |
| ENSG00000204764  | RANBP17    | protein_coding | -0.48 | 3.24E-03 | 3.52E-02 |
| ENSG00000078967  | UBE2D4     | protein_coding | 0.42  | 3.24E-03 | 3.52E-02 |
| ENSG00000116750  | UCHL5      | protein_coding | -0.59 | 3.27E-03 | 3.53E-02 |
| ENSG00000137752  | CASP1      | protein_coding | 0.97  | 3.28E-03 | 3.53E-02 |
| ENSG00000151623  | NR3C2      | protein_coding | -0.57 | 3.27E-03 | 3.53E-02 |
| ENSG00000168710  | AHCYL1     | protein_coding | 0.31  | 3.26E-03 | 3.53E-02 |
| ENSG00000172270  | BSG        | protein_coding | 0.77  | 3.28E-03 | 3.53E-02 |
| ENSG00000188641  | DPYD       | protein_coding | 0.43  | 3.27E-03 | 3.53E-02 |
| ENSG00000196476  | C20orf96   | protein_coding | 0.49  | 3.28E-03 | 3.53E-02 |
| ENSG00000166997  | CNPY4      | protein_coding | 0.47  | 3.29E-03 | 3.54E-02 |
| ENSG00000069869  | NEDD4      | protein_coding | -0.47 | 3.29E-03 | 3.54E-02 |
| ENSG00000148303  | RPL7A      | protein_coding | 0.72  | 3.33E-03 | 3.59E-02 |
| ENSG00000121578  | B4GALT4    | protein_coding | -0.48 | 3.34E-03 | 3.59E-02 |
| ENSG000000085415 | SEH1L      | protein_coding | -0.38 | 3.35E-03 | 3.60E-02 |
| ENSG00000161513  | FDXR       | protein_coding | 1.07  | 3.35E-03 | 3.60E-02 |
| ENSG00000186340  | THBS2      | protein_coding | 1.45  | 3.37E-03 | 3.62E-02 |
| ENSG00000123374  | CDK2       | protein_coding | -0.78 | 3.38E-03 | 3.62E-02 |
| ENSG00000123240  | OPTN       | protein_coding | 0.44  | 3.39E-03 | 3.63E-02 |
| ENSG00000148835  | TAF5       | protein_coding | -0.71 | 3.41E-03 | 3.65E-02 |
| ENSG00000184992  | BRI3BP     | protein_coding | -0.51 | 3.42E-03 | 3.65E-02 |
| ENSG00000231924  | PSG1       | protein_coding | 1.47  | 3.45E-03 | 3.69E-02 |
| ENSG00000125843  | AP5S1      | protein_coding | 0.48  | 3.48E-03 | 3.71E-02 |
| ENSG00000160712  | IL6R       | protein_coding | -0.55 | 3.48E-03 | 3.71E-02 |
| ENSG00000169255  | B3GALNT1   | protein_coding | -0.44 | 3.48E-03 | 3.71E-02 |
| ENSG00000101158  | NELFCD     | protein_coding | 0.35  | 3.49E-03 | 3.72E-02 |
| ENSG00000119231  | SENP5      | protein_coding | -0.36 | 3.50E-03 | 3.72E-02 |
| ENSG00000172167  | MTBP       | protein_coding | -0.52 | 3.49E-03 | 3.72E-02 |
| ENSG00000175175  | PPM1E      | protein_coding | -0.67 | 3.49E-03 | 3.72E-02 |
| ENSG00000204131  | NHSL2      | protein_coding | 0.82  | 3.50E-03 | 3.72E-02 |
| ENSG00000184009  | ACTG1      | protein_coding | 0.68  | 3.51E-03 | 3.73E-02 |
| ENSG00000102575  | ACP5       | protein_coding | 0.59  | 3.52E-03 | 3.74E-02 |
| ENSG00000261582  | AL121753.1 | protein_coding | 1.17  | 3.54E-03 | 3.75E-02 |
| ENSG00000131871  | SELENOS    | protein_coding | -0.41 | 3.55E-03 | 3.75E-02 |
| ENSG00000167971  | CASKIN1    | protein_coding | 1.01  | 3.55E-03 | 3.75E-02 |
| ENSG00000166439  | RNF169     | protein_coding | -0.45 | 3.59E-03 | 3.78E-02 |
| ENSG00000185046  | ANKS1B     | protein_coding | 0.44  | 3.62E-03 | 3.81E-02 |
| ENSG00000145794  | MEGF10     | protein_coding | -1.14 | 3.62E-03 | 3.82E-02 |
| ENSG00000136449  | MYCBPAP    | protein_coding | 1.28  | 3.64E-03 | 3.83E-02 |
| ENSG00000163629  | PTPN13     | protein_coding | 0.58  | 3.65E-03 | 3.84E-02 |
| ENSG00000143727  | ACP1       | protein_coding | -0.47 | 3.66E-03 | 3.85E-02 |
| ENSG00000122376  | FAM35A     | protein_coding | 0.53  | 3.68E-03 | 3.87E-02 |
| ENSG00000168374  | ARF4       | protein_coding | -0.62 | 3.68E-03 | 3.87E-02 |
| ENSG00000132436  | FIGNL1     | protein_coding | -0.48 | 3.69E-03 | 3.88E-02 |
| ENSG00000198954  | KIF1BP     | protein_coding | -0.53 | 3.71E-03 | 3.89E-02 |
| ENSG00000132879  | FBXO44     | protein_coding | 1.21  | 3.71E-03 | 3.89E-02 |
| ENSG00000169189  | NSMCE1     | protein_coding | 0.47  | 3.72E-03 | 3.89E-02 |
| ENSG00000065029  | ZNF76      | protein_coding | 0.63  | 3.73E-03 | 3.90E-02 |
| ENSG00000160007  | ARHGAP35   | protein_coding | 0.32  | 3.74E-03 | 3.91E-02 |

|                 |           |                |       |          |          |
|-----------------|-----------|----------------|-------|----------|----------|
| ENSG00000141232 | TOB1      | protein_coding | 0.35  | 3.75E-03 | 3.92E-02 |
| ENSG00000113269 | RNF130    | protein_coding | -0.50 | 3.79E-03 | 3.96E-02 |
| ENSG00000072210 | ALDH3A2   | protein_coding | 0.54  | 3.80E-03 | 3.96E-02 |
| ENSG00000152457 | DCLRE1C   | protein_coding | -0.46 | 3.81E-03 | 3.97E-02 |
| ENSG00000163462 | TRIM46    | protein_coding | 1.24  | 3.81E-03 | 3.97E-02 |
| ENSG00000168214 | RBPJ      | protein_coding | -0.41 | 3.81E-03 | 3.97E-02 |
| ENSG00000082146 | STRADB    | protein_coding | -0.56 | 3.82E-03 | 3.97E-02 |
| ENSG00000154175 | ABI3BP    | protein_coding | -0.48 | 3.82E-03 | 3.98E-02 |
| ENSG00000176244 | ACBD7     | protein_coding | -0.74 | 3.84E-03 | 3.99E-02 |
| ENSG00000144468 | RHBDD1    | protein_coding | -0.52 | 3.85E-03 | 3.99E-02 |
| ENSG00000089902 | RCOR1     | protein_coding | -0.41 | 3.86E-03 | 4.00E-02 |
| ENSG00000158079 | PTPDC1    | protein_coding | -0.39 | 3.86E-03 | 4.00E-02 |
| ENSG00000124260 | MAGEA10   | protein_coding | -1.05 | 3.86E-03 | 4.00E-02 |
| ENSG00000054965 | FAM168A   | protein_coding | 0.42  | 3.87E-03 | 4.01E-02 |
| ENSG00000136824 | SMC2      | protein_coding | -0.37 | 3.88E-03 | 4.01E-02 |
| ENSG00000140319 | SRP14     | protein_coding | 0.48  | 3.88E-03 | 4.01E-02 |
| ENSG00000156587 | UBE2L6    | protein_coding | 0.66  | 3.90E-03 | 4.02E-02 |
| ENSG00000167861 | HID1      | protein_coding | 1.41  | 3.91E-03 | 4.04E-02 |
| ENSG00000133321 | RARRES3   | protein_coding | 1.26  | 3.92E-03 | 4.04E-02 |
| ENSG00000146376 | ARHGAP18  | protein_coding | 0.69  | 3.92E-03 | 4.04E-02 |
| ENSG00000168280 | KIF5C     | protein_coding | 1.04  | 3.95E-03 | 4.06E-02 |
| ENSG00000109846 | CRYAB     | protein_coding | -0.59 | 3.95E-03 | 4.06E-02 |
| ENSG00000111911 | HINT3     | protein_coding | 0.85  | 3.99E-03 | 4.10E-02 |
| ENSG00000128578 | STRIP2    | protein_coding | -0.47 | 4.00E-03 | 4.11E-02 |
| ENSG00000156709 | AIFM1     | protein_coding | 0.37  | 4.00E-03 | 4.11E-02 |
| ENSG00000133460 | SLC2A11   | protein_coding | 1.39  | 4.00E-03 | 4.11E-02 |
| ENSG00000119812 | FAM98A    | protein_coding | -0.45 | 4.02E-03 | 4.12E-02 |
| ENSG00000185352 | HS6ST3    | protein_coding | 1.35  | 4.04E-03 | 4.14E-02 |
| ENSG00000153094 | BCL2L11   | protein_coding | 0.55  | 4.04E-03 | 4.14E-02 |
| ENSG00000135929 | CYP27A1   | protein_coding | 1.16  | 4.09E-03 | 4.18E-02 |
| ENSG00000141127 | PRPSAP2   | protein_coding | 0.45  | 4.11E-03 | 4.20E-02 |
| ENSG00000090905 | TNRC6A    | protein_coding | 0.39  | 4.13E-03 | 4.21E-02 |
| ENSG00000004961 | HCCS      | protein_coding | -0.62 | 4.14E-03 | 4.22E-02 |
| ENSG00000145901 | TNIP1     | protein_coding | 0.64  | 4.13E-03 | 4.22E-02 |
| ENSG00000089818 | NECAP1    | protein_coding | -0.46 | 4.18E-03 | 4.26E-02 |
| ENSG00000078269 | SYNJ2     | protein_coding | -0.44 | 4.20E-03 | 4.27E-02 |
| ENSG00000104375 | STK3      | protein_coding | 0.46  | 4.20E-03 | 4.27E-02 |
| ENSG00000012817 | KDM5D     | protein_coding | 0.33  | 4.20E-03 | 4.27E-02 |
| ENSG00000145919 | BOD1      | protein_coding | 0.44  | 4.21E-03 | 4.27E-02 |
| ENSG00000272886 | DCP1A     | protein_coding | -0.33 | 4.21E-03 | 4.27E-02 |
| ENSG00000221995 | TIAF1     | protein_coding | 0.75  | 4.22E-03 | 4.28E-02 |
| ENSG00000163623 | NKX6-1    | protein_coding | -0.73 | 4.23E-03 | 4.28E-02 |
| ENSG0000012822  | CALCOCO1  | protein_coding | 0.59  | 4.24E-03 | 4.28E-02 |
| ENSG00000090565 | RAB11FIP3 | protein_coding | 0.61  | 4.23E-03 | 4.28E-02 |
| ENSG00000122035 | RASL11A   | protein_coding | 1.45  | 4.24E-03 | 4.28E-02 |
| ENSG00000160781 | PAQR6     | protein_coding | 1.08  | 4.24E-03 | 4.28E-02 |
| ENSG00000159450 | TCHH      | protein_coding | 0.62  | 4.24E-03 | 4.28E-02 |
| ENSG00000124788 | ATXN1     | protein_coding | 0.42  | 4.25E-03 | 4.28E-02 |
| ENSG00000131773 | KHDRBS3   | protein_coding | -0.62 | 4.27E-03 | 4.30E-02 |
| ENSG00000146776 | ATXN7L1   | protein_coding | 0.52  | 4.28E-03 | 4.31E-02 |
| ENSG00000154188 | ANGPT1    | protein_coding | 0.91  | 4.28E-03 | 4.31E-02 |
| ENSG00000120129 | DUSP1     | protein_coding | 0.74  | 4.30E-03 | 4.32E-02 |
| ENSG00000013503 | POLR3B    | protein_coding | -0.66 | 4.31E-03 | 4.33E-02 |
| ENSG00000127314 | RAP1B     | protein_coding | -0.51 | 4.31E-03 | 4.33E-02 |
| ENSG00000157978 | LDLRAP1   | protein_coding | -0.47 | 4.34E-03 | 4.35E-02 |
| ENSG00000154654 | NCAM2     | protein_coding | 0.63  | 4.36E-03 | 4.37E-02 |
| ENSG00000080986 | NDC80     | protein_coding | -0.44 | 4.39E-03 | 4.40E-02 |
| ENSG00000104213 | PDGFRL    | protein_coding | -0.93 | 4.40E-03 | 4.40E-02 |
| ENSG00000180354 | MTURN     | protein_coding | -0.48 | 4.42E-03 | 4.42E-02 |
| ENSG00000105245 | NUMBL     | protein_coding | 0.72  | 4.43E-03 | 4.43E-02 |
| ENSG00000100605 | ITPK1     | protein_coding | 1.00  | 4.45E-03 | 4.45E-02 |
| ENSG00000135503 | ACVR1B    | protein_coding | -0.40 | 4.46E-03 | 4.45E-02 |
| ENSG00000158966 | CACHD1    | protein_coding | -0.49 | 4.46E-03 | 4.45E-02 |
| ENSG00000122565 | CBX3      | protein_coding | -0.37 | 4.49E-03 | 4.47E-02 |
| ENSG00000089692 | LAG3      | protein_coding | 1.27  | 4.50E-03 | 4.47E-02 |

|                 |          |                |       |          |          |
|-----------------|----------|----------------|-------|----------|----------|
| ENSG00000185274 | GALNT17  | protein_coding | -0.59 | 4.50E-03 | 4.47E-02 |
| ENSG00000077063 | CTTNBP2  | protein_coding | 0.70  | 4.53E-03 | 4.49E-02 |
| ENSG00000105220 | GPI      | protein_coding | 0.54  | 4.55E-03 | 4.51E-02 |
| ENSG00000099219 | ERMP1    | protein_coding | 0.61  | 4.55E-03 | 4.51E-02 |
| ENSG00000109501 | WFS1     | protein_coding | 0.80  | 4.58E-03 | 4.54E-02 |
| ENSG00000172244 | C5orf34  | protein_coding | -0.66 | 4.59E-03 | 4.54E-02 |
| ENSG00000104324 | CPQ      | protein_coding | 0.38  | 4.60E-03 | 4.55E-02 |
| ENSG00000123427 | EEF1AKMT | protein_coding | -0.61 | 4.61E-03 | 4.56E-02 |
| ENSG00000105131 | EPHX3    | protein_coding | 1.38  | 4.62E-03 | 4.56E-02 |
| ENSG00000078140 | UBE2K    | protein_coding | -0.56 | 4.69E-03 | 4.62E-02 |
| ENSG00000112280 | COL9A1   | protein_coding | -0.82 | 4.71E-03 | 4.64E-02 |
| ENSG00000168646 | AXIN2    | protein_coding | 1.00  | 4.73E-03 | 4.65E-02 |
| ENSG00000155974 | GRIP1    | protein_coding | 1.08  | 4.74E-03 | 4.66E-02 |
| ENSG00000110395 | CBL      | protein_coding | -0.38 | 4.74E-03 | 4.66E-02 |
| ENSG00000138182 | KIF20B   | protein_coding | -0.42 | 4.75E-03 | 4.66E-02 |
| ENSG00000151014 | NOCT     | protein_coding | -0.50 | 4.75E-03 | 4.66E-02 |
| ENSG00000139517 | LNX2     | protein_coding | -0.62 | 4.77E-03 | 4.67E-02 |
| ENSG00000182963 | GJC1     | protein_coding | -0.46 | 4.77E-03 | 4.67E-02 |
| ENSG00000196562 | SULF2    | protein_coding | 1.20  | 4.78E-03 | 4.68E-02 |
| ENSG00000104147 | OIP5     | protein_coding | -0.61 | 4.81E-03 | 4.70E-02 |
| ENSG00000118961 | LDAH     | protein_coding | 0.64  | 4.82E-03 | 4.71E-02 |
| ENSG00000163938 | GNL3     | protein_coding | -0.37 | 4.83E-03 | 4.72E-02 |
| ENSG00000189266 | PNRC2    | protein_coding | -0.42 | 4.90E-03 | 4.78E-02 |
| ENSG00000151725 | CENPU    | protein_coding | -0.48 | 4.95E-03 | 4.81E-02 |
| ENSG00000156030 | ELMSAN1  | protein_coding | 0.38  | 4.94E-03 | 4.81E-02 |
| ENSG00000215018 | COL28A1  | protein_coding | 1.01  | 4.94E-03 | 4.81E-02 |
| ENSG00000165060 | FXN      | protein_coding | -0.48 | 4.95E-03 | 4.81E-02 |
| ENSG00000178163 | ZNF518B  | protein_coding | -0.55 | 4.95E-03 | 4.81E-02 |
| ENSG00000120437 | ACAT2    | protein_coding | -0.73 | 4.96E-03 | 4.82E-02 |
| ENSG00000104129 | DNAJC17  | protein_coding | 0.50  | 4.98E-03 | 4.83E-02 |
| ENSG00000176444 | CLK2     | protein_coding | 0.44  | 4.99E-03 | 4.84E-02 |
| ENSG00000117394 | SLC2A1   | protein_coding | -0.57 | 5.03E-03 | 4.87E-02 |
| ENSG00000165609 | NUDT5    | protein_coding | 0.39  | 5.06E-03 | 4.89E-02 |
| ENSG00000167378 | IRGQ     | protein_coding | -0.35 | 5.06E-03 | 4.90E-02 |
| ENSG00000156140 | ADAMTS3  | protein_coding | 0.38  | 5.08E-03 | 4.91E-02 |
| ENSG00000087128 | TMPRSS11 | protein_coding | -0.92 | 5.09E-03 | 4.92E-02 |
| ENSG00000106479 | ZNF862   | protein_coding | 0.70  | 5.10E-03 | 4.92E-02 |
| ENSG00000163900 | TMEM41A  | protein_coding | 0.58  | 5.11E-03 | 4.92E-02 |
| ENSG00000140265 | ZSCAN29  | protein_coding | -0.50 | 5.12E-03 | 4.93E-02 |
| ENSG00000141376 | BCAS3    | protein_coding | 0.36  | 5.12E-03 | 4.93E-02 |
| ENSG00000136244 | IL6      | protein_coding | -0.56 | 5.13E-03 | 4.93E-02 |
| ENSG00000068305 | MEF2A    | protein_coding | 0.52  | 5.14E-03 | 4.94E-02 |
| ENSG00000134007 | ADAM20   | protein_coding | 1.16  | 5.14E-03 | 4.94E-02 |
| ENSG00000253767 | PCDHGA8  | protein_coding | 0.67  | 5.15E-03 | 4.94E-02 |
| ENSG00000255112 | CHMP1B   | protein_coding | 0.51  | 5.17E-03 | 4.96E-02 |
| ENSG00000082641 | NFE2L1   | protein_coding | 0.46  | 5.18E-03 | 4.96E-02 |
| ENSG00000136542 | GALNT5   | protein_coding | -0.57 | 5.17E-03 | 4.96E-02 |
| ENSG00000142619 | PADI3    | protein_coding | 1.52  | 5.18E-03 | 4.96E-02 |
| ENSG00000166669 | ATF7IP2  | protein_coding | -1.23 | 5.19E-03 | 4.97E-02 |
| ENSG00000276600 | RAB7B    | protein_coding | 0.60  | 5.21E-03 | 4.98E-02 |
| ENSG00000198879 | SFMBT2   | protein_coding | -0.53 | 5.22E-03 | 4.99E-02 |

## List of DE pcRNAs (ShortTKD vs.NC)

|                 | symbol   | group          | logFC | PValue   | FDR      |
|-----------------|----------|----------------|-------|----------|----------|
| ENSG00000144959 | NCEH1    | protein_coding | -1.87 | 1.02E-39 | 1.59E-35 |
| ENSG00000101350 | KIF3B    | protein_coding | 1.41  | 3.57E-32 | 2.78E-28 |
| ENSG00000143322 | ABL2     | protein_coding | -1.09 | 8.01E-32 | 4.17E-28 |
| ENSG00000173726 | TOMM20   | protein_coding | -1.18 | 3.39E-29 | 1.32E-25 |
| ENSG00000178202 | KDELC2   | protein_coding | -1.19 | 4.18E-27 | 1.30E-23 |
| ENSG00000153904 | DDAH1    | protein_coding | -1.28 | 1.07E-23 | 2.78E-20 |
| ENSG00000065911 | MTHFD2   | protein_coding | -1.01 | 3.09E-23 | 6.88E-20 |
| ENSG00000123213 | NLN      | protein_coding | 1.32  | 1.97E-21 | 3.83E-18 |
| ENSG00000170385 | SLC30A1  | protein_coding | -1.52 | 3.15E-20 | 5.46E-17 |
| ENSG00000197451 | HNRNPAB  | protein_coding | -0.90 | 9.70E-20 | 1.51E-16 |
| ENSG00000186298 | PPP1CC   | protein_coding | 1.23  | 2.55E-19 | 3.61E-16 |
| ENSG00000152661 | GJA1     | protein_coding | 1.15  | 1.79E-18 | 2.33E-15 |
| ENSG00000082146 | STRADB   | protein_coding | -1.27 | 3.71E-18 | 4.46E-15 |
| ENSG00000147853 | AK3      | protein_coding | 1.10  | 4.54E-18 | 5.06E-15 |
| ENSG00000035403 | VCL      | protein_coding | 1.06  | 5.39E-18 | 5.60E-15 |
| ENSG00000001461 | NIPAL3   | protein_coding | 1.09  | 1.05E-17 | 1.02E-14 |
| ENSG00000213390 | ARHGAP19 | protein_coding | -1.42 | 1.27E-16 | 1.17E-13 |
| ENSG00000134046 | MBD2     | protein_coding | 1.19  | 2.04E-16 | 1.77E-13 |
| ENSG00000125249 | RAP2A    | protein_coding | 1.30  | 2.33E-16 | 1.91E-13 |
| ENSG00000165704 | HPRT1    | protein_coding | 1.36  | 2.73E-16 | 2.13E-13 |
| ENSG00000100554 | ATP6V1D  | protein_coding | 1.04  | 5.61E-16 | 4.17E-13 |
| ENSG00000149218 | ENDOD1   | protein_coding | -1.26 | 7.80E-16 | 5.53E-13 |
| ENSG00000197312 | DDI2     | protein_coding | -0.95 | 1.39E-15 | 9.40E-13 |
| ENSG00000145335 | SNCA     | protein_coding | 1.17  | 3.37E-15 | 2.10E-12 |
| ENSG00000164300 | SERINC5  | protein_coding | 1.10  | 5.85E-15 | 3.51E-12 |
| ENSG00000169180 | XPO6     | protein_coding | 0.84  | 1.03E-14 | 5.95E-12 |
| ENSG00000112697 | TMEM30A  | protein_coding | 0.98  | 1.48E-14 | 8.26E-12 |
| ENSG00000152377 | SPOCK1   | protein_coding | -1.14 | 1.56E-14 | 8.39E-12 |
| ENSG00000100503 | NIN      | protein_coding | 0.82  | 3.76E-14 | 1.95E-11 |
| ENSG00000163428 | LRRC58   | protein_coding | 1.05  | 4.16E-14 | 2.09E-11 |
| ENSG00000121005 | CRISPLD1 | protein_coding | -1.14 | 4.72E-14 | 2.30E-11 |
| ENSG00000120594 | PLXDC2   | protein_coding | 1.09  | 6.31E-14 | 2.89E-11 |
| ENSG00000185896 | LAMP1    | protein_coding | 0.75  | 6.24E-14 | 2.89E-11 |
| ENSG00000108821 | COL1A1   | protein_coding | 0.99  | 8.80E-14 | 3.92E-11 |
| ENSG00000101000 | PROCR    | protein_coding | 1.13  | 1.17E-13 | 4.92E-11 |
| ENSG00000110880 | CORO1C   | protein_coding | -0.90 | 1.17E-13 | 4.92E-11 |
| ENSG00000184992 | BRI3BP   | protein_coding | -0.94 | 2.04E-13 | 8.16E-11 |
| ENSG00000114812 | VIPR1    | protein_coding | 1.05  | 2.12E-13 | 8.28E-11 |
| ENSG00000174010 | KLHL15   | protein_coding | -1.22 | 3.27E-13 | 1.24E-10 |
| ENSG00000173065 | FAM222B  | protein_coding | 0.82  | 5.96E-13 | 2.22E-10 |
| ENSG00000129128 | SPCS3    | protein_coding | -1.02 | 6.88E-13 | 2.50E-10 |
| ENSG00000135823 | STX6     | protein_coding | 0.92  | 8.94E-13 | 3.17E-10 |
| ENSG00000139433 | GLTP     | protein_coding | 0.96  | 1.46E-12 | 5.06E-10 |
| ENSG00000110048 | OSBP     | protein_coding | 0.80  | 1.76E-12 | 5.98E-10 |
| ENSG00000065060 | UHRF1BP1 | protein_coding | -0.79 | 3.23E-12 | 1.07E-09 |
| ENSG00000094975 | SUCO     | protein_coding | -0.84 | 3.38E-12 | 1.10E-09 |
| ENSG00000115825 | PRKD3    | protein_coding | 0.84  | 6.04E-12 | 1.92E-09 |
| ENSG00000119314 | PTBP3    | protein_coding | -0.84 | 7.46E-12 | 2.32E-09 |
| ENSG00000151012 | SLC7A11  | protein_coding | -1.02 | 7.57E-12 | 2.32E-09 |
| ENSG00000095203 | EPB41L4B | protein_coding | -0.92 | 8.68E-12 | 2.61E-09 |
| ENSG00000184014 | DENND5A  | protein_coding | -0.73 | 1.03E-11 | 3.03E-09 |
| ENSG00000070614 | NDST1    | protein_coding | 1.04  | 1.14E-11 | 3.29E-09 |
| ENSG00000112763 | BTN2A1   | protein_coding | 0.81  | 1.39E-11 | 3.88E-09 |
| ENSG00000167601 | AXL      | protein_coding | 0.93  | 1.38E-11 | 3.88E-09 |
| ENSG00000122203 | KIAA1191 | protein_coding | 0.70  | 3.61E-11 | 9.70E-09 |
| ENSG00000196950 | SLC39A10 | protein_coding | -0.98 | 7.37E-11 | 1.92E-08 |
| ENSG00000134291 | TMEM106C | protein_coding | 0.75  | 8.96E-11 | 2.29E-08 |
| ENSG00000139644 | TMBIM6   | protein_coding | 0.66  | 1.26E-10 | 3.17E-08 |
| ENSG00000155380 | SLC16A1  | protein_coding | -0.76 | 1.89E-10 | 4.69E-08 |
| ENSG00000159055 | MIS18A   | protein_coding | -1.00 | 2.33E-10 | 5.67E-08 |
| ENSG00000054983 | GALC     | protein_coding | 0.82  | 2.45E-10 | 5.87E-08 |
| ENSG00000006125 | AP2B1    | protein_coding | 0.61  | 2.63E-10 | 6.21E-08 |
| ENSG00000175175 | PPM1E    | protein_coding | -1.71 | 2.90E-10 | 6.74E-08 |

|                 |            |                |       |          |          |
|-----------------|------------|----------------|-------|----------|----------|
| ENSG00000120656 | TAF12      | protein_coding | 1.04  | 3.71E-10 | 8.50E-08 |
| ENSG00000140105 | WARS       | protein_coding | 0.84  | 4.81E-10 | 1.09E-07 |
| ENSG00000108100 | CCNY       | protein_coding | 0.88  | 4.98E-10 | 1.11E-07 |
| ENSG00000006432 | MAP3K9     | protein_coding | -0.77 | 5.73E-10 | 1.26E-07 |
| ENSG00000153214 | TMEM87B    | protein_coding | 0.78  | 8.37E-10 | 1.81E-07 |
| ENSG00000063180 | CA11       | protein_coding | 0.86  | 9.61E-10 | 2.05E-07 |
| ENSG00000111110 | PPM1H      | protein_coding | 0.59  | 1.02E-09 | 2.14E-07 |
| ENSG00000158435 | CNOT11     | protein_coding | -0.85 | 1.03E-09 | 2.14E-07 |
| ENSG00000132823 | OSER1      | protein_coding | -0.87 | 1.13E-09 | 2.33E-07 |
| ENSG00000163251 | FZD5       | protein_coding | -1.08 | 1.27E-09 | 2.57E-07 |
| ENSG00000133606 | MKRN1      | protein_coding | 0.73  | 1.31E-09 | 2.61E-07 |
| ENSG00000248109 | AC011346.1 | protein_coding | -1.14 | 1.39E-09 | 2.75E-07 |
| ENSG00000205221 | VIT        | protein_coding | 1.10  | 1.45E-09 | 2.83E-07 |
| ENSG00000166128 | RAB8B      | protein_coding | -1.15 | 1.68E-09 | 3.24E-07 |
| ENSG00000059804 | SLC2A3     | protein_coding | -1.14 | 1.84E-09 | 3.46E-07 |
| ENSG00000143815 | LBR        | protein_coding | -0.69 | 1.83E-09 | 3.46E-07 |
| ENSG00000186951 | PPARA      | protein_coding | -1.15 | 2.02E-09 | 3.76E-07 |
| ENSG00000159217 | IGF2BP1    | protein_coding | -0.56 | 2.17E-09 | 3.98E-07 |
| ENSG00000106771 | TMEM245    | protein_coding | 0.63  | 2.24E-09 | 4.06E-07 |
| ENSG00000167193 | CRK        | protein_coding | 0.61  | 2.69E-09 | 4.83E-07 |
| ENSG00000170004 | CHD3       | protein_coding | 0.74  | 3.11E-09 | 5.52E-07 |
| ENSG00000057663 | ATG5       | protein_coding | 0.75  | 3.23E-09 | 5.66E-07 |
| ENSG00000135272 | MDFIC      | protein_coding | -0.84 | 3.61E-09 | 6.25E-07 |
| ENSG00000180694 | TMEM64     | protein_coding | -0.75 | 4.01E-09 | 6.88E-07 |
| ENSG00000109819 | PPARGC1A   | protein_coding | 1.13  | 4.28E-09 | 7.26E-07 |
| ENSG00000198756 | COLGALT2   | protein_coding | 0.69  | 4.98E-09 | 8.36E-07 |
| ENSG00000213281 | NRAS       | protein_coding | 0.82  | 5.29E-09 | 8.73E-07 |
| ENSG00000247315 | ZCCHC3     | protein_coding | -0.79 | 5.31E-09 | 8.73E-07 |
| ENSG00000214510 | SPINK13    | protein_coding | -0.89 | 5.60E-09 | 9.10E-07 |
| ENSG00000171848 | RRM2       | protein_coding | -0.73 | 6.96E-09 | 1.12E-06 |
| ENSG00000114450 | GNB4       | protein_coding | -0.73 | 7.27E-09 | 1.16E-06 |
| ENSG00000108582 | CPD        | protein_coding | -0.82 | 9.50E-09 | 1.50E-06 |
| ENSG00000121274 | PAPD5      | protein_coding | -0.98 | 9.83E-09 | 1.53E-06 |
| ENSG00000123836 | PFKFB2     | protein_coding | -0.69 | 1.07E-08 | 1.65E-06 |
| ENSG00000139514 | SLC7A1     | protein_coding | -0.65 | 1.08E-08 | 1.65E-06 |
| ENSG00000130066 | SAT1       | protein_coding | 0.58  | 1.12E-08 | 1.69E-06 |
| ENSG00000175592 | FOSL1      | protein_coding | -1.11 | 1.14E-08 | 1.72E-06 |
| ENSG00000156671 | SAMD8      | protein_coding | 0.76  | 1.20E-08 | 1.78E-06 |
| ENSG00000178695 | KCTD12     | protein_coding | 1.01  | 1.21E-08 | 1.78E-06 |
| ENSG00000123575 | FAM199X    | protein_coding | -0.93 | 1.28E-08 | 1.87E-06 |
| ENSG00000113300 | CNOT6      | protein_coding | -0.75 | 1.30E-08 | 1.88E-06 |
| ENSG00000154359 | LONRF1     | protein_coding | 0.74  | 1.44E-08 | 2.06E-06 |
| ENSG00000134070 | IRAK2      | protein_coding | -1.01 | 1.52E-08 | 2.15E-06 |
| ENSG00000170017 | ALCAM      | protein_coding | 0.72  | 1.58E-08 | 2.21E-06 |
| ENSG00000085721 | RRN3       | protein_coding | -0.72 | 1.74E-08 | 2.43E-06 |
| ENSG00000087253 | LPCAT2     | protein_coding | -0.98 | 1.80E-08 | 2.49E-06 |
| ENSG00000134954 | ETS1       | protein_coding | 0.61  | 1.96E-08 | 2.68E-06 |
| ENSG00000086062 | B4GALT1    | protein_coding | -0.83 | 2.50E-08 | 3.39E-06 |
| ENSG00000106799 | TGFBR1     | protein_coding | -0.69 | 2.61E-08 | 3.51E-06 |
| ENSG00000151718 | WWC2       | protein_coding | 0.62  | 2.74E-08 | 3.66E-06 |
| ENSG00000112144 | ICK        | protein_coding | 0.65  | 3.04E-08 | 4.02E-06 |
| ENSG00000110851 | PRDM4      | protein_coding | -0.64 | 3.34E-08 | 4.38E-06 |
| ENSG00000165156 | ZHX1       | protein_coding | -0.90 | 3.43E-08 | 4.46E-06 |
| ENSG00000157388 | CACNA1D    | protein_coding | 0.82  | 3.55E-08 | 4.58E-06 |
| ENSG00000022840 | RNF10      | protein_coding | 0.73  | 3.69E-08 | 4.71E-06 |
| ENSG00000135414 | GDF11      | protein_coding | -0.68 | 3.83E-08 | 4.86E-06 |
| ENSG00000183283 | DAZAP2     | protein_coding | 0.66  | 4.08E-08 | 5.13E-06 |
| ENSG00000073282 | TP63       | protein_coding | -0.81 | 4.60E-08 | 5.74E-06 |
| ENSG00000182670 | TTC3       | protein_coding | 0.66  | 4.78E-08 | 5.92E-06 |
| ENSG00000006459 | KDM7A      | protein_coding | -0.80 | 4.82E-08 | 5.92E-06 |
| ENSG00000152939 | MARVELD2   | protein_coding | 0.77  | 4.96E-08 | 6.04E-06 |
| ENSG00000271601 | LIX1L      | protein_coding | 0.58  | 5.14E-08 | 6.22E-06 |
| ENSG00000205268 | PDE7A      | protein_coding | -0.66 | 5.71E-08 | 6.85E-06 |
| ENSG00000213366 | GSTM2      | protein_coding | 0.95  | 6.29E-08 | 7.49E-06 |
| ENSG00000115159 | GPD2       | protein_coding | -0.58 | 6.38E-08 | 7.54E-06 |

|                 |           |                |       |          |          |
|-----------------|-----------|----------------|-------|----------|----------|
| ENSG00000153956 | CACNA2D1  | protein_coding | 1.12  | 6.53E-08 | 7.66E-06 |
| ENSG00000105270 | CLIP3     | protein_coding | 1.15  | 7.49E-08 | 8.72E-06 |
| ENSG00000183778 | B3GALT5   | protein_coding | -2.27 | 9.00E-08 | 1.04E-05 |
| ENSG00000145901 | TNIP1     | protein_coding | 0.66  | 9.76E-08 | 1.12E-05 |
| ENSG00000131504 | DIAPH1    | protein_coding | 0.61  | 1.04E-07 | 1.18E-05 |
| ENSG00000135048 | TMEM2     | protein_coding | -1.19 | 1.10E-07 | 1.24E-05 |
| ENSG00000165474 | GJB2      | protein_coding | -1.68 | 1.13E-07 | 1.26E-05 |
| ENSG00000097033 | SH3GLB1   | protein_coding | -0.78 | 1.25E-07 | 1.40E-05 |
| ENSG00000164924 | YWHAZ     | protein_coding | 0.61  | 1.29E-07 | 1.43E-05 |
| ENSG00000128578 | STRIP2    | protein_coding | -0.85 | 1.40E-07 | 1.54E-05 |
| ENSG00000165097 | KDM1B     | protein_coding | 0.70  | 1.43E-07 | 1.56E-05 |
| ENSG00000001561 | ENPP4     | protein_coding | 0.75  | 1.49E-07 | 1.62E-05 |
| ENSG00000122376 | FAM35A    | protein_coding | 0.71  | 1.52E-07 | 1.64E-05 |
| ENSG00000133740 | E2F5      | protein_coding | -0.91 | 1.72E-07 | 1.84E-05 |
| ENSG00000083067 | TRPM3     | protein_coding | -0.79 | 1.80E-07 | 1.91E-05 |
| ENSG00000184005 | ST6GALNAC | protein_coding | 1.03  | 1.83E-07 | 1.93E-05 |
| ENSG00000108960 | MMD       | protein_coding | -1.12 | 1.93E-07 | 2.01E-05 |
| ENSG00000198824 | CHAMP1    | protein_coding | 0.61  | 1.93E-07 | 2.01E-05 |
| ENSG00000178662 | CSRNP3    | protein_coding | 0.68  | 1.95E-07 | 2.01E-05 |
| ENSG00000132964 | CDK8      | protein_coding | -0.84 | 1.96E-07 | 2.01E-05 |
| ENSG00000143476 | DTL       | protein_coding | -0.57 | 1.97E-07 | 2.01E-05 |
| ENSG00000101346 | POFUT1    | protein_coding | -0.62 | 2.02E-07 | 2.05E-05 |
| ENSG00000003989 | SLC7A2    | protein_coding | -0.97 | 2.24E-07 | 2.24E-05 |
| ENSG00000136816 | TOR1B     | protein_coding | 0.68  | 2.23E-07 | 2.24E-05 |
| ENSG00000117479 | SLC19A2   | protein_coding | -0.90 | 2.29E-07 | 2.27E-05 |
| ENSG00000109133 | TMEM33    | protein_coding | 0.60  | 2.39E-07 | 2.36E-05 |
| ENSG00000140526 | ABHD2     | protein_coding | -0.59 | 2.76E-07 | 2.71E-05 |
| ENSG00000128829 | EIF2AK4   | protein_coding | 0.65  | 3.06E-07 | 2.98E-05 |
| ENSG00000164938 | TP53INP1  | protein_coding | -0.95 | 3.12E-07 | 3.02E-05 |
| ENSG00000272391 | POM121C   | protein_coding | -0.56 | 3.46E-07 | 3.34E-05 |
| ENSG00000197977 | ELOVL2    | protein_coding | -0.67 | 3.59E-07 | 3.44E-05 |
| ENSG00000072803 | FBXW11    | protein_coding | -0.70 | 3.70E-07 | 3.49E-05 |
| ENSG00000136122 | BORA      | protein_coding | -0.67 | 3.67E-07 | 3.49E-05 |
| ENSG00000011114 | BTBD7     | protein_coding | 0.66  | 4.20E-07 | 3.95E-05 |
| ENSG00000138646 | HERC5     | protein_coding | -0.94 | 5.20E-07 | 4.86E-05 |
| ENSG00000131876 | SNRPA1    | protein_coding | 0.56  | 5.64E-07 | 5.24E-05 |
| ENSG00000168329 | CX3CR1    | protein_coding | 0.69  | 6.13E-07 | 5.65E-05 |
| ENSG00000139496 | NUP58     | protein_coding | -0.57 | 6.43E-07 | 5.90E-05 |
| ENSG00000065000 | AP3D1     | protein_coding | 0.73  | 6.61E-07 | 6.03E-05 |
| ENSG00000145864 | GABRB2    | protein_coding | 0.94  | 6.78E-07 | 6.15E-05 |
| ENSG00000101911 | PRPS2     | protein_coding | 1.16  | 8.17E-07 | 7.37E-05 |
| ENSG00000171320 | ESCO2     | protein_coding | -0.68 | 8.82E-07 | 7.90E-05 |
| ENSG00000145391 | SETD7     | protein_coding | -0.68 | 9.33E-07 | 8.31E-05 |
| ENSG00000124562 | SNRPC     | protein_coding | -0.67 | 9.47E-07 | 8.39E-05 |
| ENSG00000173530 | TNFRSF10D | protein_coding | 0.67  | 9.62E-07 | 8.48E-05 |
| ENSG00000111679 | PTPN6     | protein_coding | 1.00  | 9.77E-07 | 8.56E-05 |
| ENSG00000048471 | SNX29     | protein_coding | 0.67  | 1.00E-06 | 8.75E-05 |
| ENSG00000181704 | YIPF6     | protein_coding | -0.87 | 1.07E-06 | 9.28E-05 |
| ENSG00000100441 | KHNYN     | protein_coding | -0.66 | 1.08E-06 | 9.29E-05 |
| ENSG00000108861 | DUSP3     | protein_coding | -0.56 | 1.09E-06 | 9.33E-05 |
| ENSG00000158711 | ELK4      | protein_coding | -0.70 | 1.16E-06 | 9.86E-05 |
| ENSG00000113845 | TIMMDC1   | protein_coding | 0.85  | 1.21E-06 | 1.03E-04 |
| ENSG00000169905 | TOR1AIP2  | protein_coding | 0.45  | 1.45E-06 | 1.22E-04 |
| ENSG00000159720 | ATP6V0D1  | protein_coding | 0.95  | 1.59E-06 | 1.33E-04 |
| ENSG00000164466 | SFXN1     | protein_coding | -0.53 | 1.62E-06 | 1.35E-04 |
| ENSG00000124575 | HIST1H1D  | protein_coding | -1.11 | 1.66E-06 | 1.38E-04 |
| ENSG00000111540 | RAB5B     | protein_coding | 0.60  | 1.85E-06 | 1.53E-04 |
| ENSG00000121060 | TRIM25    | protein_coding | -0.64 | 1.93E-06 | 1.59E-04 |
| ENSG00000114739 | ACVR2B    | protein_coding | -0.73 | 2.18E-06 | 1.78E-04 |
| ENSG00000076716 | GPC4      | protein_coding | -0.53 | 2.21E-06 | 1.80E-04 |
| ENSG00000112078 | KCTD20    | protein_coding | -0.62 | 2.24E-06 | 1.81E-04 |
| ENSG00000135312 | HTR1B     | protein_coding | 1.63  | 2.30E-06 | 1.85E-04 |
| ENSG00000168411 | RFWD3     | protein_coding | -0.57 | 2.33E-06 | 1.86E-04 |
| ENSG00000138771 | SHROOM3   | protein_coding | 0.67  | 2.47E-06 | 1.96E-04 |
| ENSG00000105173 | CCNE1     | protein_coding | -0.70 | 2.63E-06 | 2.07E-04 |

|                 |          |                |       |          |          |
|-----------------|----------|----------------|-------|----------|----------|
| ENSG00000137177 | KIF13A   | protein_coding | 0.50  | 2.63E-06 | 2.07E-04 |
| ENSG00000120519 | SLC10A7  | protein_coding | -0.78 | 2.74E-06 | 2.15E-04 |
| ENSG00000156017 | CARNMT1  | protein_coding | -0.81 | 2.78E-06 | 2.17E-04 |
| ENSG00000104081 | BMF      | protein_coding | 0.80  | 2.86E-06 | 2.22E-04 |
| ENSG00000170745 | KCNS3    | protein_coding | -1.49 | 2.90E-06 | 2.24E-04 |
| ENSG00000204923 | FBXO48   | protein_coding | -0.88 | 2.96E-06 | 2.27E-04 |
| ENSG00000131374 | TBC1D5   | protein_coding | 0.54  | 3.29E-06 | 2.51E-04 |
| ENSG00000164045 | CDC25A   | protein_coding | -0.80 | 3.28E-06 | 2.51E-04 |
| ENSG00000198492 | YTHDF2   | protein_coding | 0.69  | 3.33E-06 | 2.52E-04 |
| ENSG00000110092 | CCND1    | protein_coding | -0.76 | 3.48E-06 | 2.63E-04 |
| ENSG00000131711 | MAP1B    | protein_coding | 0.49  | 3.59E-06 | 2.69E-04 |
| ENSG00000113456 | RAD1     | protein_coding | -0.67 | 3.65E-06 | 2.72E-04 |
| ENSG00000141867 | BRD4     | protein_coding | 0.44  | 4.09E-06 | 3.04E-04 |
| ENSG00000140416 | TPM1     | protein_coding | 0.51  | 4.29E-06 | 3.17E-04 |
| ENSG00000101367 | MAPRE1   | protein_coding | -0.47 | 4.34E-06 | 3.19E-04 |
| ENSG00000143418 | CERS2    | protein_coding | 0.53  | 4.35E-06 | 3.19E-04 |
| ENSG00000035141 | FAM136A  | protein_coding | -0.50 | 4.58E-06 | 3.33E-04 |
| ENSG00000084444 | FAM234B  | protein_coding | -0.83 | 4.56E-06 | 3.33E-04 |
| ENSG00000172061 | LRRC15   | protein_coding | -1.10 | 4.73E-06 | 3.42E-04 |
| ENSG00000099246 | RAB18    | protein_coding | -0.57 | 4.78E-06 | 3.43E-04 |
| ENSG00000104660 | LEPROTL1 | protein_coding | -0.72 | 4.79E-06 | 3.43E-04 |
| ENSG00000121957 | GPSM2    | protein_coding | -0.68 | 4.83E-06 | 3.44E-04 |
| ENSG00000120837 | NFYB     | protein_coding | -0.55 | 5.15E-06 | 3.65E-04 |
| ENSG00000162441 | LZIC     | protein_coding | 0.80  | 5.34E-06 | 3.77E-04 |
| ENSG00000115539 | PDCL3    | protein_coding | 0.65  | 5.55E-06 | 3.86E-04 |
| ENSG00000117758 | STX12    | protein_coding | -0.61 | 5.54E-06 | 3.86E-04 |
| ENSG00000167005 | NUDT21   | protein_coding | -0.60 | 5.52E-06 | 3.86E-04 |
| ENSG00000137265 | IRF4     | protein_coding | -0.69 | 5.58E-06 | 3.87E-04 |
| ENSG00000177034 | MTX3     | protein_coding | -0.50 | 6.01E-06 | 4.15E-04 |
| ENSG00000155099 | TMEM55A  | protein_coding | 0.69  | 6.25E-06 | 4.30E-04 |
| ENSG00000164236 | ANKRD33B | protein_coding | -0.75 | 6.44E-06 | 4.41E-04 |
| ENSG00000150938 | CRIM1    | protein_coding | 0.50  | 6.50E-06 | 4.43E-04 |
| ENSG00000100796 | PPP4R3A  | protein_coding | -0.47 | 7.06E-06 | 4.79E-04 |
| ENSG00000104164 | BLOC1S6  | protein_coding | -0.75 | 7.66E-06 | 5.15E-04 |
| ENSG00000167378 | IRGQ     | protein_coding | -0.49 | 7.65E-06 | 5.15E-04 |
| ENSG00000112419 | PHACTR2  | protein_coding | -0.62 | 7.73E-06 | 5.17E-04 |
| ENSG00000181826 | RELL1    | protein_coding | -0.56 | 8.12E-06 | 5.41E-04 |
| ENSG00000148154 | UGCG     | protein_coding | -0.49 | 8.16E-06 | 5.42E-04 |
| ENSG00000145882 | PCYOX1L  | protein_coding | 1.09  | 8.49E-06 | 5.61E-04 |
| ENSG00000141580 | WDR45B   | protein_coding | -0.64 | 8.92E-06 | 5.87E-04 |
| ENSG00000172795 | DCP2     | protein_coding | -0.59 | 8.98E-06 | 5.88E-04 |
| ENSG00000101290 | CDS2     | protein_coding | -0.60 | 9.03E-06 | 5.89E-04 |
| ENSG00000182247 | UBE2E2   | protein_coding | -0.82 | 9.54E-06 | 6.20E-04 |
| ENSG00000145907 | G3BP1    | protein_coding | 0.42  | 9.80E-06 | 6.34E-04 |
| ENSG00000171867 | PRNP     | protein_coding | -0.89 | 1.02E-05 | 6.57E-04 |
| ENSG00000137460 | FHDC1    | protein_coding | 0.59  | 1.05E-05 | 6.71E-04 |
| ENSG00000153561 | RMND5A   | protein_coding | -0.60 | 1.10E-05 | 6.98E-04 |
| ENSG00000175087 | PDIK1L   | protein_coding | -0.64 | 1.10E-05 | 6.98E-04 |
| ENSG00000112964 | GHR      | protein_coding | 0.60  | 1.12E-05 | 7.08E-04 |
| ENSG00000147471 | PLPBP    | protein_coding | 0.59  | 1.14E-05 | 7.20E-04 |
| ENSG00000154930 | ACSS1    | protein_coding | -0.93 | 1.29E-05 | 8.03E-04 |
| ENSG00000129317 | PUS7L    | protein_coding | -0.56 | 1.30E-05 | 8.11E-04 |
| ENSG00000136352 | NKX2-1   | protein_coding | 1.56  | 1.32E-05 | 8.16E-04 |
| ENSG00000157869 | RAB28    | protein_coding | -0.61 | 1.34E-05 | 8.27E-04 |
| ENSG00000186472 | PCLO     | protein_coding | -0.56 | 1.39E-05 | 8.54E-04 |
| ENSG00000072364 | AFF4     | protein_coding | 0.47  | 1.46E-05 | 8.92E-04 |
| ENSG00000124145 | SDC4     | protein_coding | -0.78 | 1.47E-05 | 8.92E-04 |
| ENSG00000140835 | CHST4    | protein_coding | 0.67  | 1.47E-05 | 8.92E-04 |
| ENSG00000168385 | 2-Sep    | protein_coding | 0.41  | 1.55E-05 | 9.39E-04 |
| ENSG00000170456 | DENND5B  | protein_coding | -0.74 | 1.60E-05 | 9.62E-04 |
| ENSG00000177606 | JUN      | protein_coding | -0.62 | 1.63E-05 | 9.80E-04 |
| ENSG00000185697 | MYBL1    | protein_coding | -0.77 | 1.65E-05 | 9.87E-04 |
| ENSG00000005020 | SKAP2    | protein_coding | 0.73  | 1.66E-05 | 9.88E-04 |
| ENSG00000008282 | SYPL1    | protein_coding | -0.63 | 1.68E-05 | 9.88E-04 |
| ENSG00000140307 | GTF2A2   | protein_coding | 0.67  | 1.68E-05 | 9.88E-04 |



|                 |          |                |       |          |          |
|-----------------|----------|----------------|-------|----------|----------|
| ENSG00000196313 | POM121   | protein_coding | -0.54 | 1.68E-05 | 9.88E-04 |
| ENSG00000213064 | SFT2D2   | protein_coding | -0.72 | 1.67E-05 | 9.88E-04 |
| ENSG00000167552 | TUBA1A   | protein_coding | 0.52  | 1.73E-05 | 1.01E-03 |
| ENSG00000110987 | BCL7A    | protein_coding | 0.80  | 1.80E-05 | 1.05E-03 |
| ENSG00000167767 | KRT80    | protein_coding | -0.79 | 1.81E-05 | 1.05E-03 |
| ENSG00000177981 | ASB8     | protein_coding | 0.59  | 1.85E-05 | 1.07E-03 |
| ENSG00000170653 | ATF7     | protein_coding | 0.50  | 1.96E-05 | 1.13E-03 |
| ENSG00000069869 | NEDD4    | protein_coding | -0.58 | 2.04E-05 | 1.17E-03 |
| ENSG00000166924 | NYAP1    | protein_coding | 1.68  | 2.04E-05 | 1.17E-03 |
| ENSG00000198786 | MT-ND5   | protein_coding | 0.45  | 2.06E-05 | 1.18E-03 |
| ENSG00000162300 | ZFPL1    | protein_coding | 0.76  | 2.26E-05 | 1.28E-03 |
| ENSG00000037749 | MFAP3    | protein_coding | 0.59  | 2.28E-05 | 1.29E-03 |
| ENSG00000163820 | FYCO1    | protein_coding | 0.47  | 2.29E-05 | 1.29E-03 |
| ENSG00000181381 | DDX60L   | protein_coding | -0.51 | 2.29E-05 | 1.29E-03 |
| ENSG00000134202 | GSTM3    | protein_coding | 0.52  | 2.50E-05 | 1.39E-03 |
| ENSG00000205730 | ITPRIPL2 | protein_coding | -0.44 | 2.49E-05 | 1.39E-03 |
| ENSG00000167034 | NKX3-1   | protein_coding | -0.47 | 2.51E-05 | 1.39E-03 |
| ENSG00000100139 | MICALL1  | protein_coding | -0.70 | 2.55E-05 | 1.41E-03 |
| ENSG00000176641 | RNF152   | protein_coding | 0.92  | 2.58E-05 | 1.42E-03 |
| ENSG00000109321 | AREG     | protein_coding | 0.61  | 2.67E-05 | 1.46E-03 |
| ENSG00000164023 | SGMS2    | protein_coding | -0.74 | 2.72E-05 | 1.49E-03 |
| ENSG00000184156 | KCNQ3    | protein_coding | -0.85 | 2.73E-05 | 1.49E-03 |
| ENSG00000101104 | PABPC1L  | protein_coding | 0.67  | 2.88E-05 | 1.56E-03 |
| ENSG00000112902 | SEMA5A   | protein_coding | 0.57  | 2.90E-05 | 1.57E-03 |
| ENSG00000171451 | DSEL     | protein_coding | 0.73  | 2.91E-05 | 1.57E-03 |
| ENSG00000160710 | ADAR     | protein_coding | 0.59  | 2.98E-05 | 1.60E-03 |
| ENSG00000105971 | CAV2     | protein_coding | -0.52 | 3.00E-05 | 1.61E-03 |
| ENSG00000110844 | PRPF40B  | protein_coding | 0.70  | 3.02E-05 | 1.61E-03 |
| ENSG00000117523 | PRRC2C   | protein_coding | 0.44  | 3.09E-05 | 1.64E-03 |
| ENSG00000103591 | AAGAB    | protein_coding | 0.46  | 3.38E-05 | 1.79E-03 |
| ENSG00000197329 | PELI1    | protein_coding | -0.64 | 3.40E-05 | 1.79E-03 |
| ENSG00000176046 | NUPR1    | protein_coding | 0.55  | 3.42E-05 | 1.80E-03 |
| ENSG00000143878 | RHOB     | protein_coding | -0.77 | 3.49E-05 | 1.83E-03 |
| ENSG00000169504 | CLIC4    | protein_coding | 0.49  | 3.52E-05 | 1.83E-03 |
| ENSG00000196678 | ERI2     | protein_coding | -0.58 | 3.53E-05 | 1.83E-03 |
| ENSG00000065485 | PDIA5    | protein_coding | -0.75 | 3.72E-05 | 1.93E-03 |
| ENSG00000173083 | HPSE     | protein_coding | 0.82  | 3.78E-05 | 1.95E-03 |
| ENSG00000204272 | NBDY     | protein_coding | 0.50  | 4.03E-05 | 2.07E-03 |
| ENSG00000011465 | DCN      | protein_coding | 0.51  | 4.08E-05 | 2.09E-03 |
| ENSG00000104369 | JPH1     | protein_coding | 0.60  | 4.12E-05 | 2.11E-03 |
| ENSG00000164933 | SLC25A32 | protein_coding | -0.73 | 4.20E-05 | 2.14E-03 |
| ENSG00000196323 | ZBTB44   | protein_coding | -0.58 | 4.29E-05 | 2.18E-03 |
| ENSG00000196449 | YRDC     | protein_coding | -1.24 | 4.51E-05 | 2.28E-03 |
| ENSG00000130956 | HABP4    | protein_coding | 0.54  | 4.53E-05 | 2.28E-03 |
| ENSG00000121064 | SCPEP1   | protein_coding | 0.53  | 4.65E-05 | 2.34E-03 |
| ENSG00000104490 | NCALD    | protein_coding | 0.56  | 4.78E-05 | 2.40E-03 |
| ENSG00000156463 | SH3RF2   | protein_coding | -0.85 | 4.85E-05 | 2.42E-03 |
| ENSG00000103769 | RAB11A   | protein_coding | 0.42  | 4.94E-05 | 2.46E-03 |
| ENSG00000255690 | TRIL     | protein_coding | 0.76  | 5.04E-05 | 2.50E-03 |
| ENSG00000120539 | MASTL    | protein_coding | -0.53 | 5.11E-05 | 2.53E-03 |
| ENSG00000173812 | EIF1     | protein_coding | 0.44  | 5.22E-05 | 2.58E-03 |
| ENSG00000100625 | SIX4     | protein_coding | -0.56 | 5.41E-05 | 2.66E-03 |
| ENSG00000214189 | ZNF788   | protein_coding | -0.72 | 5.46E-05 | 2.68E-03 |
| ENSG00000101752 | MIB1     | protein_coding | 0.54  | 5.50E-05 | 2.69E-03 |
| ENSG00000164949 | GEM      | protein_coding | -0.62 | 5.57E-05 | 2.72E-03 |
| ENSG00000118495 | PLAGL1   | protein_coding | -0.65 | 5.71E-05 | 2.77E-03 |
| ENSG00000198420 | TCAF1    | protein_coding | 0.50  | 5.71E-05 | 2.77E-03 |
| ENSG00000257923 | CUX1     | protein_coding | 0.39  | 5.83E-05 | 2.82E-03 |
| ENSG00000140948 | ZCCHC14  | protein_coding | -0.48 | 5.86E-05 | 2.82E-03 |
| ENSG00000027001 | MIPEP    | protein_coding | -0.69 | 5.92E-05 | 2.84E-03 |
| ENSG00000031081 | ARHGAP31 | protein_coding | 0.43  | 5.94E-05 | 2.84E-03 |
| ENSG00000166479 | TMX3     | protein_coding | -0.54 | 5.95E-05 | 2.84E-03 |
| ENSG00000127022 | CANX     | protein_coding | -0.39 | 6.18E-05 | 2.94E-03 |
| ENSG00000069956 | MAPK6    | protein_coding | 0.59  | 6.40E-05 | 3.04E-03 |
| ENSG00000123612 | ACVR1C   | protein_coding | -1.02 | 6.54E-05 | 3.09E-03 |

|                 |          |                |       |          |          |
|-----------------|----------|----------------|-------|----------|----------|
| ENSG00000111707 | SUDS3    | protein_coding | 0.48  | 6.62E-05 | 3.12E-03 |
| ENSG00000159110 | IFNAR2   | protein_coding | -0.59 | 6.75E-05 | 3.17E-03 |
| ENSG00000114956 | DGUOK    | protein_coding | -0.57 | 7.02E-05 | 3.29E-03 |
| ENSG00000179387 | ELMOD2   | protein_coding | -0.54 | 7.26E-05 | 3.39E-03 |
| ENSG00000067900 | ROCK1    | protein_coding | 0.53  | 7.33E-05 | 3.41E-03 |
| ENSG00000104687 | GSR      | protein_coding | -0.44 | 7.40E-05 | 3.43E-03 |
| ENSG00000142149 | HUNK     | protein_coding | 0.50  | 7.42E-05 | 3.43E-03 |
| ENSG00000140319 | SRP14    | protein_coding | 0.54  | 7.46E-05 | 3.44E-03 |
| ENSG00000125971 | DYNLRB1  | protein_coding | 0.43  | 7.55E-05 | 3.47E-03 |
| ENSG00000153815 | CMIP     | protein_coding | 0.52  | 7.61E-05 | 3.49E-03 |
| ENSG00000165476 | REEP3    | protein_coding | -0.66 | 7.72E-05 | 3.53E-03 |
| ENSG00000115738 | ID2      | protein_coding | 0.63  | 7.78E-05 | 3.55E-03 |
| ENSG00000141458 | NPC1     | protein_coding | -0.51 | 7.88E-05 | 3.58E-03 |
| ENSG00000101412 | E2F1     | protein_coding | -0.94 | 8.11E-05 | 3.67E-03 |
| ENSG00000152556 | PFKM     | protein_coding | 0.49  | 8.09E-05 | 3.67E-03 |
| ENSG00000019186 | CYP24A1  | protein_coding | 0.93  | 8.26E-05 | 3.71E-03 |
| ENSG00000124181 | PLCG1    | protein_coding | 0.59  | 8.39E-05 | 3.76E-03 |
| ENSG00000225830 | ERCC6    | protein_coding | 0.52  | 8.42E-05 | 3.76E-03 |
| ENSG00000137478 | FCHSD2   | protein_coding | 0.54  | 8.48E-05 | 3.77E-03 |
| ENSG00000156052 | GNAQ     | protein_coding | -0.45 | 8.50E-05 | 3.77E-03 |
| ENSG00000163935 | SFMBT1   | protein_coding | -0.53 | 8.48E-05 | 3.77E-03 |
| ENSG00000129472 | RAB2B    | protein_coding | 0.88  | 8.57E-05 | 3.79E-03 |
| ENSG00000143190 | POU2F1   | protein_coding | -0.43 | 8.63E-05 | 3.80E-03 |
| ENSG00000134531 | EMP1     | protein_coding | -0.46 | 8.84E-05 | 3.88E-03 |
| ENSG00000124541 | RRP36    | protein_coding | 0.45  | 9.08E-05 | 3.98E-03 |
| ENSG00000069122 | ADGRF5   | protein_coding | 0.51  | 9.31E-05 | 4.07E-03 |
| ENSG00000135776 | ABCB10   | protein_coding | 0.66  | 9.40E-05 | 4.10E-03 |
| ENSG00000101966 | XIAP     | protein_coding | 0.57  | 9.58E-05 | 4.16E-03 |
| ENSG00000169902 | TPST1    | protein_coding | -0.68 | 9.60E-05 | 4.16E-03 |
| ENSG00000196715 | VKORC1L1 | protein_coding | 0.46  | 9.72E-05 | 4.20E-03 |
| ENSG00000088247 | KHSRP    | protein_coding | -0.42 | 1.01E-04 | 4.34E-03 |
| ENSG00000096070 | BRPF3    | protein_coding | -0.51 | 1.04E-04 | 4.46E-03 |
| ENSG00000163900 | TMEM41A  | protein_coding | 0.77  | 1.11E-04 | 4.74E-03 |
| ENSG00000253250 | C8orf88  | protein_coding | -0.78 | 1.11E-04 | 4.74E-03 |
| ENSG00000267041 | ZNF850   | protein_coding | -0.57 | 1.11E-04 | 4.74E-03 |
| ENSG00000070778 | PTPN21   | protein_coding | 0.65  | 1.14E-04 | 4.82E-03 |
| ENSG00000177570 | SAMD12   | protein_coding | 0.50  | 1.14E-04 | 4.82E-03 |
| ENSG00000170113 | NIPA1    | protein_coding | -0.51 | 1.14E-04 | 4.84E-03 |
| ENSG00000176624 | MEX3C    | protein_coding | 0.46  | 1.15E-04 | 4.85E-03 |
| ENSG00000112378 | PERP     | protein_coding | -0.64 | 1.17E-04 | 4.92E-03 |
| ENSG00000158615 | PPP1R15B | protein_coding | -0.38 | 1.17E-04 | 4.92E-03 |
| ENSG00000163947 | ARHGEF3  | protein_coding | -0.54 | 1.18E-04 | 4.92E-03 |
| ENSG00000180998 | GPR137C  | protein_coding | -1.17 | 1.18E-04 | 4.94E-03 |
| ENSG00000111142 | METAP2   | protein_coding | 0.61  | 1.21E-04 | 5.02E-03 |
| ENSG00000072121 | ZFYVE26  | protein_coding | -0.44 | 1.21E-04 | 5.03E-03 |
| ENSG00000143033 | MTF2     | protein_coding | -0.50 | 1.33E-04 | 5.48E-03 |
| ENSG00000167325 | RRM1     | protein_coding | -0.59 | 1.33E-04 | 5.49E-03 |
| ENSG00000111371 | SLC38A1  | protein_coding | 0.41  | 1.35E-04 | 5.54E-03 |
| ENSG00000152520 | PAN3     | protein_coding | -0.44 | 1.36E-04 | 5.57E-03 |
| ENSG00000116918 | TSNAX    | protein_coding | 0.56  | 1.37E-04 | 5.61E-03 |
| ENSG00000027075 | PRKCH    | protein_coding | 0.62  | 1.39E-04 | 5.67E-03 |
| ENSG00000092964 | DPYSL2   | protein_coding | 0.38  | 1.40E-04 | 5.69E-03 |
| ENSG00000110911 | SLC11A2  | protein_coding | -0.45 | 1.42E-04 | 5.77E-03 |
| ENSG00000166295 | ANAPC16  | protein_coding | -0.65 | 1.47E-04 | 5.93E-03 |
| ENSG00000180011 | ZADH2    | protein_coding | -0.49 | 1.47E-04 | 5.93E-03 |
| ENSG00000137273 | FOXF2    | protein_coding | 0.62  | 1.51E-04 | 6.08E-03 |
| ENSG00000101846 | STS      | protein_coding | -0.61 | 1.52E-04 | 6.08E-03 |
| ENSG00000138660 | AP1AR    | protein_coding | 0.65  | 1.55E-04 | 6.18E-03 |
| ENSG00000181751 | C5orf30  | protein_coding | -0.84 | 1.62E-04 | 6.43E-03 |
| ENSG00000075391 | RASAL2   | protein_coding | -0.45 | 1.62E-04 | 6.45E-03 |
| ENSG00000198074 | AKR1B10  | protein_coding | 0.80  | 1.71E-04 | 6.78E-03 |
| ENSG00000163683 | SMIM14   | protein_coding | -0.45 | 1.74E-04 | 6.89E-03 |
| ENSG00000188167 | TMPPE    | protein_coding | -0.92 | 1.77E-04 | 6.95E-03 |
| ENSG00000197557 | TTC30A   | protein_coding | -0.67 | 1.77E-04 | 6.95E-03 |
| ENSG00000145416 | 1-Mar    | protein_coding | -0.74 | 1.78E-04 | 6.96E-03 |

|                 |          |                |       |          |          |
|-----------------|----------|----------------|-------|----------|----------|
| ENSG00000223501 | VPS52    | protein_coding | 0.40  | 1.78E-04 | 6.96E-03 |
| ENSG00000066697 | MSANTD3  | protein_coding | -0.55 | 1.79E-04 | 6.97E-03 |
| ENSG00000155897 | ADCY8    | protein_coding | -1.18 | 1.79E-04 | 6.97E-03 |
| ENSG00000075089 | ACTR6    | protein_coding | 0.74  | 1.80E-04 | 6.99E-03 |
| ENSG00000187098 | MITF     | protein_coding | -0.67 | 1.83E-04 | 7.06E-03 |
| ENSG00000114529 | C3orf52  | protein_coding | -0.56 | 1.85E-04 | 7.13E-03 |
| ENSG00000205413 | SAMD9    | protein_coding | -0.44 | 1.87E-04 | 7.17E-03 |
| ENSG00000125266 | EFNB2    | protein_coding | -0.61 | 1.91E-04 | 7.32E-03 |
| ENSG00000128923 | MINDY2   | protein_coding | -0.73 | 1.95E-04 | 7.47E-03 |
| ENSG00000149554 | CHEK1    | protein_coding | -0.53 | 1.97E-04 | 7.50E-03 |
| ENSG00000169398 | PTK2     | protein_coding | 0.44  | 1.97E-04 | 7.50E-03 |
| ENSG00000099250 | NRP1     | protein_coding | 0.36  | 2.00E-04 | 7.56E-03 |
| ENSG00000133195 | SLC39A11 | protein_coding | 0.51  | 2.01E-04 | 7.56E-03 |
| ENSG00000159216 | RUNX1    | protein_coding | -0.64 | 2.00E-04 | 7.56E-03 |
| ENSG00000173281 | PPP1R3B  | protein_coding | -0.52 | 2.01E-04 | 7.56E-03 |
| ENSG00000186470 | BTN3A2   | protein_coding | 0.40  | 2.01E-04 | 7.56E-03 |
| ENSG00000095015 | MAP3K1   | protein_coding | 0.52  | 2.04E-04 | 7.67E-03 |
| ENSG00000081154 | PCNP     | protein_coding | -0.43 | 2.07E-04 | 7.75E-03 |
| ENSG00000162694 | EXTL2    | protein_coding | 0.61  | 2.28E-04 | 8.51E-03 |
| ENSG00000128585 | MKLN1    | protein_coding | -0.48 | 2.30E-04 | 8.56E-03 |
| ENSG00000089327 | FXVD5    | protein_coding | 0.59  | 2.33E-04 | 8.67E-03 |
| ENSG00000120137 | PANK3    | protein_coding | -0.57 | 2.39E-04 | 8.84E-03 |
| ENSG00000140943 | MBTPS1   | protein_coding | -0.38 | 2.39E-04 | 8.85E-03 |
| ENSG00000142864 | SERBP1   | protein_coding | 0.39  | 2.45E-04 | 9.02E-03 |
| ENSG00000152601 | MBNL1    | protein_coding | 0.40  | 2.46E-04 | 9.06E-03 |
| ENSG00000146535 | GNA12    | protein_coding | 0.50  | 2.47E-04 | 9.07E-03 |
| ENSG00000174013 | FBXO45   | protein_coding | -0.55 | 2.76E-04 | 1.01E-02 |
| ENSG00000006607 | FARP2    | protein_coding | -0.42 | 2.77E-04 | 1.01E-02 |
| ENSG00000050393 | MCUR1    | protein_coding | 0.46  | 2.82E-04 | 1.03E-02 |
| ENSG00000186834 | HEXIM1   | protein_coding | 0.49  | 2.82E-04 | 1.03E-02 |
| ENSG00000114738 | MAPKAPK3 | protein_coding | -0.51 | 2.84E-04 | 1.03E-02 |
| ENSG00000132359 | RAP1GAP2 | protein_coding | 0.52  | 2.86E-04 | 1.04E-02 |
| ENSG00000113369 | ARRDC3   | protein_coding | -0.64 | 2.97E-04 | 1.07E-02 |
| ENSG00000143641 | GALNT2   | protein_coding | 0.45  | 2.95E-04 | 1.07E-02 |
| ENSG00000173698 | ADGRG2   | protein_coding | 0.58  | 2.96E-04 | 1.07E-02 |
| ENSG00000196850 | PPTC7    | protein_coding | -0.46 | 3.06E-04 | 1.10E-02 |
| ENSG00000205208 | C4orf46  | protein_coding | -0.41 | 3.08E-04 | 1.10E-02 |
| ENSG00000257218 | GATC     | protein_coding | -0.58 | 3.08E-04 | 1.10E-02 |
| ENSG00000139163 | ETNK1    | protein_coding | -0.52 | 3.12E-04 | 1.11E-02 |
| ENSG00000165527 | ARF6     | protein_coding | 0.37  | 3.11E-04 | 1.11E-02 |
| ENSG00000167220 | HDHD2    | protein_coding | -0.71 | 3.14E-04 | 1.11E-02 |
| ENSG00000121579 | NAA50    | protein_coding | -0.48 | 3.17E-04 | 1.12E-02 |
| ENSG00000182263 | FIGN     | protein_coding | -0.51 | 3.19E-04 | 1.13E-02 |
| ENSG00000121691 | CAT      | protein_coding | 0.54  | 3.36E-04 | 1.18E-02 |
| ENSG00000137331 | IER3     | protein_coding | 0.71  | 3.38E-04 | 1.19E-02 |
| ENSG00000196547 | MAN2A2   | protein_coding | 0.49  | 3.39E-04 | 1.19E-02 |
| ENSG00000179331 | RAB39A   | protein_coding | -0.89 | 3.43E-04 | 1.20E-02 |
| ENSG00000134250 | NOTCH2   | protein_coding | -0.33 | 3.48E-04 | 1.21E-02 |
| ENSG00000154928 | EPHB1    | protein_coding | 0.77  | 3.49E-04 | 1.21E-02 |
| ENSG00000113083 | LOX      | protein_coding | -1.07 | 3.54E-04 | 1.23E-02 |
| ENSG00000163840 | DTX3L    | protein_coding | -0.48 | 3.59E-04 | 1.24E-02 |
| ENSG00000118946 | PCDH17   | protein_coding | 0.63  | 3.61E-04 | 1.25E-02 |
| ENSG00000172469 | MANEA    | protein_coding | -0.47 | 3.66E-04 | 1.26E-02 |
| ENSG00000174808 | BTC      | protein_coding | -0.93 | 3.72E-04 | 1.27E-02 |
| ENSG00000215301 | DDX3X    | protein_coding | -0.36 | 3.71E-04 | 1.27E-02 |
| ENSG00000151133 | CCDC88C  | protein_coding | -0.57 | 3.82E-04 | 1.31E-02 |
| ENSG00000133872 | SARAF    | protein_coding | 0.69  | 3.86E-04 | 1.32E-02 |
| ENSG00000143375 | CGN      | protein_coding | 1.05  | 3.92E-04 | 1.34E-02 |
| ENSG00000162378 | ZYG11B   | protein_coding | 0.44  | 4.08E-04 | 1.39E-02 |
| ENSG00000197457 | STMN3    | protein_coding | -1.48 | 4.09E-04 | 1.39E-02 |
| ENSG00000264364 | DYNLL2   | protein_coding | -0.40 | 4.10E-04 | 1.39E-02 |
| ENSG00000180979 | LRRC57   | protein_coding | -0.50 | 4.14E-04 | 1.40E-02 |
| ENSG00000186575 | NF2      | protein_coding | -0.32 | 4.23E-04 | 1.43E-02 |
| ENSG00000057252 | SOAT1    | protein_coding | -0.41 | 4.26E-04 | 1.43E-02 |
| ENSG00000161642 | ZNF385A  | protein_coding | -1.29 | 4.33E-04 | 1.45E-02 |

|                 |          |                |       |          |          |
|-----------------|----------|----------------|-------|----------|----------|
| ENSG00000169764 | UGP2     | protein_coding | 0.46  | 4.33E-04 | 1.45E-02 |
| ENSG00000108395 | TRIM37   | protein_coding | 0.36  | 4.43E-04 | 1.48E-02 |
| ENSG00000099282 | TSPAN15  | protein_coding | 0.70  | 4.44E-04 | 1.48E-02 |
| ENSG00000138326 | RPS24    | protein_coding | 0.34  | 4.47E-04 | 1.48E-02 |
| ENSG00000168887 | C2orf68  | protein_coding | -0.47 | 4.54E-04 | 1.50E-02 |
| ENSG00000168952 | STXBP6   | protein_coding | -0.64 | 4.63E-04 | 1.53E-02 |
| ENSG00000160685 | ZBTB7B   | protein_coding | 0.64  | 4.67E-04 | 1.54E-02 |
| ENSG00000198088 | NUP62CL  | protein_coding | -0.83 | 4.67E-04 | 1.54E-02 |
| ENSG00000053254 | FOXN3    | protein_coding | -0.44 | 4.73E-04 | 1.55E-02 |
| ENSG00000119408 | NEK6     | protein_coding | 0.40  | 4.79E-04 | 1.57E-02 |
| ENSG00000140988 | RPS2     | protein_coding | 0.78  | 4.79E-04 | 1.57E-02 |
| ENSG00000197780 | TAF13    | protein_coding | -0.46 | 4.80E-04 | 1.57E-02 |
| ENSG00000154640 | BTG3     | protein_coding | -0.41 | 4.83E-04 | 1.57E-02 |
| ENSG00000058404 | CAMK2B   | protein_coding | 0.68  | 4.85E-04 | 1.58E-02 |
| ENSG00000168214 | RBPJ     | protein_coding | -0.39 | 5.23E-04 | 1.70E-02 |
| ENSG00000140479 | PCSK6    | protein_coding | 0.59  | 5.27E-04 | 1.71E-02 |
| ENSG00000102572 | STK24    | protein_coding | -0.35 | 5.30E-04 | 1.71E-02 |
| ENSG00000096696 | DSP      | protein_coding | 0.46  | 5.36E-04 | 1.73E-02 |
| ENSG00000087586 | AURKA    | protein_coding | -0.43 | 5.37E-04 | 1.73E-02 |
| ENSG00000197930 | ERO1A    | protein_coding | -0.47 | 5.49E-04 | 1.76E-02 |
| ENSG00000037965 | HOXC8    | protein_coding | 0.65  | 5.65E-04 | 1.81E-02 |
| ENSG00000119242 | CCDC92   | protein_coding | 0.54  | 5.65E-04 | 1.81E-02 |
| ENSG00000104695 | PPP2CB   | protein_coding | -0.43 | 5.68E-04 | 1.81E-02 |
| ENSG00000164520 | RAET1E   | protein_coding | -0.81 | 5.67E-04 | 1.81E-02 |
| ENSG00000220205 | VAMP2    | protein_coding | 0.61  | 5.72E-04 | 1.82E-02 |
| ENSG00000135372 | NAT10    | protein_coding | -0.37 | 5.75E-04 | 1.82E-02 |
| ENSG00000112893 | MAN2A1   | protein_coding | -0.54 | 5.78E-04 | 1.83E-02 |
| ENSG00000067208 | EVI5     | protein_coding | -0.48 | 5.84E-04 | 1.84E-02 |
| ENSG00000138613 | APH1B    | protein_coding | -0.66 | 5.83E-04 | 1.84E-02 |
| ENSG00000064313 | TAF2     | protein_coding | -0.43 | 5.86E-04 | 1.84E-02 |
| ENSG00000143742 | SRP9     | protein_coding | -0.39 | 5.86E-04 | 1.84E-02 |
| ENSG00000106080 | FKBP14   | protein_coding | -0.45 | 6.01E-04 | 1.88E-02 |
| ENSG00000112276 | BVES     | protein_coding | -0.43 | 6.00E-04 | 1.88E-02 |
| ENSG00000239713 | APOBEC3G | protein_coding | 0.74  | 6.03E-04 | 1.88E-02 |
| ENSG00000123268 | ATF1     | protein_coding | 0.47  | 6.08E-04 | 1.89E-02 |
| ENSG00000133065 | SLC41A1  | protein_coding | -0.44 | 6.17E-04 | 1.91E-02 |
| ENSG00000134376 | CRB1     | protein_coding | 0.43  | 6.18E-04 | 1.91E-02 |
| ENSG00000154127 | UBASH3B  | protein_coding | -0.51 | 6.19E-04 | 1.91E-02 |
| ENSG00000174442 | ZWILCH   | protein_coding | -0.47 | 6.17E-04 | 1.91E-02 |
| ENSG00000108384 | RAD51C   | protein_coding | -0.50 | 6.30E-04 | 1.94E-02 |
| ENSG00000153066 | TXNDC11  | protein_coding | -0.38 | 6.30E-04 | 1.94E-02 |
| ENSG00000183576 | SETD3    | protein_coding | 0.36  | 6.28E-04 | 1.94E-02 |
| ENSG00000149308 | NPAT     | protein_coding | -0.44 | 6.32E-04 | 1.94E-02 |
| ENSG00000078018 | MAP2     | protein_coding | 0.41  | 6.44E-04 | 1.96E-02 |
| ENSG00000088836 | SLC4A11  | protein_coding | 0.59  | 6.45E-04 | 1.96E-02 |
| ENSG00000170142 | UBE2E1   | protein_coding | 0.50  | 6.43E-04 | 1.96E-02 |
| ENSG00000198712 | MT-CO2   | protein_coding | 0.35  | 6.46E-04 | 1.96E-02 |
| ENSG00000101266 | CSNK2A1  | protein_coding | -0.35 | 6.50E-04 | 1.97E-02 |
| ENSG00000157168 | NRG1     | protein_coding | 0.41  | 6.50E-04 | 1.97E-02 |
| ENSG00000166225 | FRS2     | protein_coding | -0.44 | 6.67E-04 | 2.02E-02 |
| ENSG00000112339 | HBS1L    | protein_coding | 0.47  | 6.74E-04 | 2.03E-02 |
| ENSG00000103222 | ABCC1    | protein_coding | 0.59  | 6.77E-04 | 2.04E-02 |
| ENSG00000135913 | USP37    | protein_coding | -0.46 | 6.76E-04 | 2.04E-02 |
| ENSG00000070882 | OSBPL3   | protein_coding | -0.40 | 6.83E-04 | 2.05E-02 |
| ENSG00000107438 | PDLIM1   | protein_coding | 0.37  | 6.82E-04 | 2.05E-02 |
| ENSG00000156697 | UTP14A   | protein_coding | 0.36  | 6.86E-04 | 2.05E-02 |
| ENSG00000224470 | ATXN1L   | protein_coding | -0.41 | 6.86E-04 | 2.05E-02 |
| ENSG00000179715 | PCED1B   | protein_coding | 0.80  | 6.91E-04 | 2.06E-02 |
| ENSG00000196159 | FAT4     | protein_coding | 0.48  | 6.93E-04 | 2.06E-02 |
| ENSG00000082014 | SMARCD3  | protein_coding | 0.68  | 6.95E-04 | 2.06E-02 |
| ENSG00000125848 | FLRT3    | protein_coding | -0.72 | 7.03E-04 | 2.08E-02 |
| ENSG00000160712 | IL6R     | protein_coding | -0.54 | 7.15E-04 | 2.11E-02 |
| ENSG00000175395 | ZNF25    | protein_coding | 0.63  | 7.17E-04 | 2.11E-02 |
| ENSG00000128849 | CGNL1    | protein_coding | -0.49 | 7.38E-04 | 2.17E-02 |
| ENSG00000130349 | C6orf203 | protein_coding | 0.48  | 7.54E-04 | 2.21E-02 |

|                 |           |                |       |          |          |
|-----------------|-----------|----------------|-------|----------|----------|
| ENSG00000172954 | LCLAT1    | protein_coding | -0.54 | 7.79E-04 | 2.28E-02 |
| ENSG00000118193 | KIF14     | protein_coding | -0.49 | 7.87E-04 | 2.30E-02 |
| ENSG00000180875 | GREM2     | protein_coding | 0.54  | 8.03E-04 | 2.34E-02 |
| ENSG00000139146 | FAM60A    | protein_coding | -0.64 | 8.11E-04 | 2.36E-02 |
| ENSG00000143499 | SMYD2     | protein_coding | 0.43  | 8.19E-04 | 2.38E-02 |
| ENSG00000065970 | FOXJ2     | protein_coding | 0.38  | 8.23E-04 | 2.38E-02 |
| ENSG00000136240 | KDEL2     | protein_coding | -0.36 | 8.22E-04 | 2.38E-02 |
| ENSG00000176049 | JAKMIP2   | protein_coding | 0.79  | 8.30E-04 | 2.40E-02 |
| ENSG00000164619 | BMPER     | protein_coding | 0.95  | 8.48E-04 | 2.44E-02 |
| ENSG00000177888 | ZBTB41    | protein_coding | 0.62  | 8.61E-04 | 2.47E-02 |
| ENSG00000183401 | CCDC159   | protein_coding | 0.89  | 8.60E-04 | 2.47E-02 |
| ENSG00000064309 | CDON      | protein_coding | 0.33  | 8.67E-04 | 2.48E-02 |
| ENSG00000067533 | RRP15     | protein_coding | -0.69 | 8.73E-04 | 2.50E-02 |
| ENSG00000156011 | PSD3      | protein_coding | -0.39 | 8.76E-04 | 2.50E-02 |
| ENSG00000140836 | ZFH3      | protein_coding | 0.33  | 8.82E-04 | 2.52E-02 |
| ENSG00000160007 | ARHGAP35  | protein_coding | 0.36  | 9.09E-04 | 2.59E-02 |
| ENSG00000113494 | PRLR      | protein_coding | 0.52  | 9.23E-04 | 2.62E-02 |
| ENSG00000182768 | NGRN      | protein_coding | -0.38 | 9.25E-04 | 2.62E-02 |
| ENSG00000011426 | ANLN      | protein_coding | -0.42 | 9.33E-04 | 2.64E-02 |
| ENSG00000068366 | ACSL4     | protein_coding | 0.52  | 9.47E-04 | 2.68E-02 |
| ENSG00000227051 | C14orf132 | protein_coding | -1.46 | 9.51E-04 | 2.68E-02 |
| ENSG00000139220 | PPFIA2    | protein_coding | 0.56  | 9.53E-04 | 2.68E-02 |
| ENSG00000185634 | SHC4      | protein_coding | -1.30 | 9.62E-04 | 2.70E-02 |
| ENSG00000108797 | CNTNAP1   | protein_coding | 0.47  | 9.64E-04 | 2.71E-02 |
| ENSG00000115325 | DOK1      | protein_coding | 0.68  | 9.70E-04 | 2.71E-02 |
| ENSG00000157741 | UBN2      | protein_coding | -0.34 | 9.69E-04 | 2.71E-02 |
| ENSG00000143409 | MINDY1    | protein_coding | 0.52  | 9.77E-04 | 2.72E-02 |
| ENSG00000157224 | CLDN12    | protein_coding | -0.53 | 9.76E-04 | 2.72E-02 |
| ENSG00000154642 | C21orf91  | protein_coding | -0.54 | 9.82E-04 | 2.73E-02 |
| ENSG00000213988 | ZNF90     | protein_coding | -0.51 | 9.84E-04 | 2.73E-02 |
| ENSG00000107581 | EIF3A     | protein_coding | 0.46  | 1.00E-03 | 2.77E-02 |
| ENSG00000122870 | BICC1     | protein_coding | -0.58 | 1.03E-03 | 2.84E-02 |
| ENSG00000084072 | PPIE      | protein_coding | -0.54 | 1.05E-03 | 2.89E-02 |
| ENSG00000063978 | RNF4      | protein_coding | 0.43  | 1.05E-03 | 2.89E-02 |
| ENSG00000104643 | MTMR9     | protein_coding | -0.43 | 1.07E-03 | 2.94E-02 |
| ENSG00000120334 | CENPL     | protein_coding | -0.35 | 1.07E-03 | 2.94E-02 |
| ENSG00000122986 | HVCN1     | protein_coding | 0.43  | 1.07E-03 | 2.95E-02 |
| ENSG00000185345 | PRKN      | protein_coding | 0.72  | 1.09E-03 | 2.97E-02 |
| ENSG00000135318 | NT5E      | protein_coding | -0.57 | 1.11E-03 | 3.02E-02 |
| ENSG00000136867 | SLC31A2   | protein_coding | -0.73 | 1.11E-03 | 3.02E-02 |
| ENSG00000136492 | BRIP1     | protein_coding | -0.42 | 1.13E-03 | 3.07E-02 |
| ENSG00000205045 | SLFN12L   | protein_coding | -0.96 | 1.14E-03 | 3.09E-02 |
| ENSG00000108439 | PNPO      | protein_coding | -0.64 | 1.15E-03 | 3.10E-02 |
| ENSG00000105289 | TJP3      | protein_coding | 1.69  | 1.15E-03 | 3.11E-02 |
| ENSG00000198018 | ENTPD7    | protein_coding | -0.39 | 1.15E-03 | 3.11E-02 |
| ENSG00000131016 | AKAP12    | protein_coding | -0.38 | 1.16E-03 | 3.12E-02 |
| ENSG00000182220 | ATP6AP2   | protein_coding | 0.39  | 1.17E-03 | 3.14E-02 |
| ENSG00000163710 | PCOLCE2   | protein_coding | -0.59 | 1.18E-03 | 3.16E-02 |
| ENSG00000114098 | ARMC8     | protein_coding | -0.48 | 1.20E-03 | 3.20E-02 |
| ENSG00000145675 | PIK3R1    | protein_coding | -0.47 | 1.22E-03 | 3.24E-02 |
| ENSG00000138685 | FGF2      | protein_coding | 0.53  | 1.23E-03 | 3.28E-02 |
| ENSG00000152484 | USP12     | protein_coding | -0.54 | 1.26E-03 | 3.34E-02 |
| ENSG00000165609 | NUDT5     | protein_coding | 0.42  | 1.26E-03 | 3.35E-02 |
| ENSG00000152223 | EPG5      | protein_coding | -0.36 | 1.27E-03 | 3.37E-02 |
| ENSG00000103042 | SLC38A7   | protein_coding | 0.52  | 1.28E-03 | 3.37E-02 |
| ENSG00000021574 | SPAST     | protein_coding | 0.44  | 1.29E-03 | 3.39E-02 |
| ENSG00000154124 | OTULIN    | protein_coding | -0.36 | 1.29E-03 | 3.40E-02 |
| ENSG00000164442 | CITED2    | protein_coding | 0.33  | 1.30E-03 | 3.43E-02 |
| ENSG00000143248 | RGS5      | protein_coding | 0.86  | 1.39E-03 | 3.65E-02 |
| ENSG00000148303 | RPL7A     | protein_coding | 0.62  | 1.40E-03 | 3.67E-02 |
| ENSG00000167535 | CACNB3    | protein_coding | 0.82  | 1.41E-03 | 3.67E-02 |
| ENSG00000136444 | RSAD1     | protein_coding | 0.55  | 1.42E-03 | 3.69E-02 |
| ENSG00000145794 | MEGF10    | protein_coding | -1.12 | 1.41E-03 | 3.69E-02 |
| ENSG00000110756 | HPS5      | protein_coding | 0.40  | 1.42E-03 | 3.70E-02 |
| ENSG00000075213 | SEMA3A    | protein_coding | 0.51  | 1.43E-03 | 3.71E-02 |

|                 |           |                |       |          |          |
|-----------------|-----------|----------------|-------|----------|----------|
| ENSG00000137962 | ARHGAP29  | protein_coding | -0.49 | 1.44E-03 | 3.73E-02 |
| ENSG00000196504 | PRPF40A   | protein_coding | 0.45  | 1.48E-03 | 3.82E-02 |
| ENSG00000151151 | IPMK      | protein_coding | -0.66 | 1.48E-03 | 3.83E-02 |
| ENSG00000154114 | TBCEL     | protein_coding | -0.88 | 1.49E-03 | 3.84E-02 |
| ENSG00000127507 | ADGRE2    | protein_coding | 1.40  | 1.49E-03 | 3.84E-02 |
| ENSG00000057657 | PRDM1     | protein_coding | 0.52  | 1.50E-03 | 3.84E-02 |
| ENSG00000133056 | PIK3C2B   | protein_coding | 0.47  | 1.50E-03 | 3.84E-02 |
| ENSG00000138593 | SECISBP2L | protein_coding | -0.42 | 1.51E-03 | 3.85E-02 |
| ENSG00000168769 | TET2      | protein_coding | 0.49  | 1.50E-03 | 3.85E-02 |
| ENSG00000126803 | HSPA2     | protein_coding | 0.84  | 1.51E-03 | 3.85E-02 |
| ENSG00000004961 | HCCS      | protein_coding | -0.44 | 1.53E-03 | 3.91E-02 |
| ENSG00000111752 | PHC1      | protein_coding | 0.59  | 1.54E-03 | 3.92E-02 |
| ENSG00000115084 | SLC35F5   | protein_coding | -0.46 | 1.57E-03 | 3.98E-02 |
| ENSG00000102098 | SCML2     | protein_coding | -0.48 | 1.57E-03 | 3.99E-02 |
| ENSG00000100605 | ITPK1     | protein_coding | 0.91  | 1.58E-03 | 4.00E-02 |
| ENSG00000070182 | SPTB      | protein_coding | -0.63 | 1.60E-03 | 4.04E-02 |
| ENSG00000107341 | UBE2R2    | protein_coding | -0.37 | 1.60E-03 | 4.04E-02 |
| ENSG00000203867 | RBM20     | protein_coding | 0.48  | 1.60E-03 | 4.04E-02 |
| ENSG00000134982 | APC       | protein_coding | 0.48  | 1.61E-03 | 4.04E-02 |
| ENSG00000105948 | TTC26     | protein_coding | -0.53 | 1.61E-03 | 4.05E-02 |
| ENSG00000135074 | ADAM19    | protein_coding | -0.33 | 1.61E-03 | 4.05E-02 |
| ENSG00000088899 | LZTS3     | protein_coding | 0.68  | 1.64E-03 | 4.10E-02 |
| ENSG00000106571 | GLI3      | protein_coding | -0.43 | 1.64E-03 | 4.10E-02 |
| ENSG00000166046 | TCP11L2   | protein_coding | 0.61  | 1.66E-03 | 4.14E-02 |
| ENSG00000168710 | AHCYL1    | protein_coding | 0.32  | 1.70E-03 | 4.24E-02 |
| ENSG00000177076 | ACER2     | protein_coding | -0.93 | 1.71E-03 | 4.25E-02 |
| ENSG00000168461 | RAB31     | protein_coding | -0.61 | 1.71E-03 | 4.25E-02 |
| ENSG00000178074 | C2orf69   | protein_coding | -0.43 | 1.72E-03 | 4.25E-02 |
| ENSG00000105649 | RAB3A     | protein_coding | 0.75  | 1.73E-03 | 4.26E-02 |
| ENSG00000176225 | RTTN      | protein_coding | -0.37 | 1.73E-03 | 4.26E-02 |
| ENSG00000179454 | KLHL28    | protein_coding | -0.66 | 1.74E-03 | 4.28E-02 |
| ENSG00000111247 | RAD51AP1  | protein_coding | -0.42 | 1.74E-03 | 4.29E-02 |
| ENSG00000179456 | ZBTB18    | protein_coding | -0.75 | 1.75E-03 | 4.29E-02 |
| ENSG00000155265 | GOLGA7B   | protein_coding | -1.65 | 1.78E-03 | 4.35E-02 |
| ENSG00000170802 | FOXN2     | protein_coding | 0.40  | 1.79E-03 | 4.37E-02 |
| ENSG00000003249 | DBNDD1    | protein_coding | 0.83  | 1.82E-03 | 4.43E-02 |
| ENSG00000101849 | TBL1X     | protein_coding | 0.70  | 1.84E-03 | 4.49E-02 |
| ENSG00000172244 | C5orf34   | protein_coding | -0.49 | 1.89E-03 | 4.57E-02 |
| ENSG00000178878 | APOLD1    | protein_coding | -0.45 | 1.89E-03 | 4.57E-02 |
| ENSG00000182022 | CHST15    | protein_coding | 0.51  | 1.88E-03 | 4.57E-02 |
| ENSG00000184661 | CDCA2     | protein_coding | -0.38 | 1.89E-03 | 4.57E-02 |
| ENSG00000137203 | TFAP2A    | protein_coding | 0.32  | 1.93E-03 | 4.65E-02 |
| ENSG00000168743 | NPNT      | protein_coding | -1.48 | 1.94E-03 | 4.67E-02 |
| ENSG00000097046 | CDC7      | protein_coding | -0.46 | 1.96E-03 | 4.69E-02 |
| ENSG00000172840 | PDP2      | protein_coding | -0.40 | 1.96E-03 | 4.69E-02 |
| ENSG00000103540 | CCP110    | protein_coding | -0.50 | 1.98E-03 | 4.72E-02 |
| ENSG00000151690 | MFSD6     | protein_coding | 0.51  | 1.97E-03 | 4.72E-02 |
| ENSG00000148229 | POLE3     | protein_coding | -0.33 | 1.99E-03 | 4.75E-02 |
| ENSG00000125871 | MGME1     | protein_coding | -0.47 | 2.00E-03 | 4.76E-02 |
| ENSG00000152782 | PANK1     | protein_coding | -0.59 | 2.02E-03 | 4.80E-02 |
| ENSG00000175895 | PLEKHF2   | protein_coding | -0.63 | 2.02E-03 | 4.80E-02 |
| ENSG00000116005 | PCYOX1    | protein_coding | 0.40  | 2.06E-03 | 4.89E-02 |
| ENSG00000160131 | VMA21     | protein_coding | -0.49 | 2.06E-03 | 4.89E-02 |

List of DE pcRNAs (Both Down-regulated)

|                 | symbol     |
|-----------------|------------|
| ENSG00000144959 | NCEH1      |
| ENSG00000143322 | ABL2       |
| ENSG00000153904 | DDAH1      |
| ENSG00000065911 | MTHFD2     |
| ENSG00000170385 | SLC30A1    |
| ENSG00000082146 | STRADB     |
| ENSG00000213390 | ARHGAP19   |
| ENSG00000197312 | DDI2       |
| ENSG00000184992 | BRI3BP     |
| ENSG00000174010 | KLHL15     |
| ENSG00000094975 | SUCO       |
| ENSG00000095203 | EPB41L4B   |
| ENSG00000184014 | DENND5A    |
| ENSG00000196950 | SLC39A10   |
| ENSG00000155380 | SLC16A1    |
| ENSG00000159055 | MIS18A     |
| ENSG00000175175 | PPM1E      |
| ENSG00000006432 | MAP3K9     |
| ENSG00000248109 | AC011346.1 |
| ENSG00000059804 | SLC2A3     |
| ENSG00000143815 | LBR        |
| ENSG00000159217 | IGF2BP1    |
| ENSG00000180694 | TMEM64     |
| ENSG00000247315 | ZCCHC3     |
| ENSG00000214510 | SPINK13    |
| ENSG00000171848 | RRM2       |
| ENSG00000114450 | GNB4       |
| ENSG00000139514 | SLC7A1     |
| ENSG00000006459 | KDM7A      |
| ENSG00000205268 | PDE7A      |
| ENSG00000115159 | GPD2       |
| ENSG00000165474 | GJB2       |
| ENSG00000128578 | STRIP2     |
| ENSG00000133740 | E2F5       |
| ENSG00000083067 | TRPM3      |
| ENSG00000143476 | DTL        |
| ENSG00000003989 | SLC7A2     |
| ENSG00000197977 | ELOVL2     |
| ENSG00000136122 | BORA       |
| ENSG00000138646 | HERC5      |
| ENSG00000139496 | NUP58      |
| ENSG00000171320 | ESCO2      |
| ENSG00000164466 | SFXN1      |
| ENSG00000124575 | HIST1H1D   |
| ENSG00000112078 | KCTD20     |
| ENSG00000168411 | RFWD3      |
| ENSG00000105173 | CCNE1      |
| ENSG00000204923 | FBXO48     |
| ENSG00000164045 | CDC25A     |
| ENSG00000110092 | CCND1      |
| ENSG00000121957 | GPSM2      |
| ENSG00000120837 | NFYB       |
| ENSG00000167005 | NUDT21     |
| ENSG00000164236 | ANKRD33B   |
| ENSG00000167378 | IRGQ       |
| ENSG00000181826 | RELL1      |
| ENSG00000172795 | DCP2       |
| ENSG00000101290 | CDS2       |
| ENSG00000129317 | PUS7L      |
| ENSG00000186472 | PCLO       |

|                 |          |
|-----------------|----------|
| ENSG00000124145 | SDC4     |
| ENSG00000167767 | KRT80    |
| ENSG00000069869 | NEDD4    |
| ENSG00000167034 | NKX3-1   |
| ENSG00000164023 | SGMS2    |
| ENSG00000184156 | KCNQ3    |
| ENSG00000197329 | PELI1    |
| ENSG00000143878 | RHOB     |
| ENSG00000156463 | SH3RF2   |
| ENSG00000120539 | MASTL    |
| ENSG00000100625 | SIX4     |
| ENSG00000214189 | ZNF788   |
| ENSG00000118495 | PLAGL1   |
| ENSG00000123612 | ACVR1C   |
| ENSG00000156052 | GNAQ     |
| ENSG00000134531 | EMP1     |
| ENSG00000169902 | TPST1    |
| ENSG00000267041 | ZNF850   |
| ENSG00000170113 | NIPA1    |
| ENSG00000158615 | PPP1R15B |
| ENSG00000180998 | GPR137C  |
| ENSG00000143033 | MTF2     |
| ENSG00000167325 | RRM1     |
| ENSG00000110911 | SLC11A2  |
| ENSG00000101846 | STS      |
| ENSG00000075391 | RASAL2   |
| ENSG00000197557 | TTC30A   |
| ENSG00000145416 | MARCH1   |
| ENSG00000155897 | ADCY8    |
| ENSG00000125266 | EFNB2    |
| ENSG00000128923 | MINDY2   |
| ENSG00000149554 | CHEK1    |
| ENSG00000173281 | PPP1R3B  |
| ENSG00000120137 | PANK3    |
| ENSG00000174013 | FBXO45   |
| ENSG00000006607 | FARP2    |
| ENSG00000205208 | C4orf46  |
| ENSG00000121579 | NAA50    |
| ENSG00000179331 | RAB39A   |
| ENSG00000172469 | MANEA    |
| ENSG00000180979 | LRRC57   |
| ENSG00000168952 | STXBP6   |
| ENSG00000198088 | NUP62CL  |
| ENSG00000053254 | FOXN3    |
| ENSG00000154640 | BTG3     |
| ENSG00000168214 | RBPJ     |
| ENSG00000087586 | AURKA    |
| ENSG00000197930 | ERO1A    |
| ENSG00000112893 | MAN2A1   |
| ENSG00000106080 | FKBP14   |
| ENSG00000112276 | BVES     |
| ENSG00000154127 | UBASH3B  |
| ENSG00000174442 | ZWILCH   |
| ENSG00000153066 | TXNDC11  |
| ENSG00000149308 | NPAT     |
| ENSG00000135913 | USP37    |
| ENSG00000125848 | FLRT3    |
| ENSG00000160712 | IL6R     |
| ENSG00000172954 | LCLAT1   |
| ENSG00000118193 | KIF14    |
| ENSG00000136240 | KDEL2    |
| ENSG00000011426 | ANLN     |



|                 |          |
|-----------------|----------|
| ENSG00000157224 | CLDN12   |
| ENSG00000213988 | ZNF90    |
| ENSG00000104643 | MTMR9    |
| ENSG00000120334 | CENPL    |
| ENSG00000136492 | BRIP1    |
| ENSG00000198018 | ENTPD7   |
| ENSG00000145794 | MEGF10   |
| ENSG00000137962 | ARHGAP29 |
| ENSG00000151151 | IPMK     |
| ENSG00000004961 | HCCS     |
| ENSG00000102098 | SCML2    |
| ENSG00000135074 | ADAM19   |
| ENSG00000176225 | RTTN     |
| ENSG00000111247 | RAD51AP1 |
| ENSG00000172244 | C5orf34  |
| ENSG00000184661 | CDCA2    |
| ENSG00000148229 | POLE3    |

List of DE pcRNAs (Both Up-regulated)

|                 | symbol   |
|-----------------|----------|
| ENSG00000101350 | KIF3B    |
| ENSG00000123213 | NLN      |
| ENSG00000186298 | PPP1CC   |
| ENSG00000147853 | AK3      |
| ENSG00000035403 | VCL      |
| ENSG00000001461 | NIPAL3   |
| ENSG00000134046 | MBD2     |
| ENSG00000125249 | RAP2A    |
| ENSG00000165704 | HPRT1    |
| ENSG00000100554 | ATP6V1D  |
| ENSG00000145335 | SNCA     |
| ENSG00000169180 | XPO6     |
| ENSG00000100503 | NIN      |
| ENSG00000120594 | PLXDC2   |
| ENSG00000185896 | LAMP1    |
| ENSG00000108821 | COL1A1   |
| ENSG00000101000 | PROCR    |
| ENSG00000114812 | VIPR1    |
| ENSG00000135823 | STX6     |
| ENSG00000110048 | OSBP     |
| ENSG00000115825 | PRKD3    |
| ENSG00000070614 | NDST1    |
| ENSG00000112763 | BTN2A1   |
| ENSG00000167601 | AXL      |
| ENSG00000122203 | KIAA1191 |
| ENSG00000139644 | TMBIM6   |
| ENSG00000006125 | AP2B1    |
| ENSG00000120656 | TAF12    |
| ENSG00000140105 | WARS     |
| ENSG00000108100 | CCNY     |
| ENSG00000153214 | TMEM87B  |
| ENSG00000063180 | CA11     |
| ENSG00000133606 | MKRN1    |
| ENSG00000205221 | VIT      |
| ENSG00000167193 | CRK      |
| ENSG00000170004 | CHD3     |
| ENSG00000057663 | ATG5     |
| ENSG00000130066 | SAT1     |
| ENSG00000178695 | KCTD12   |
| ENSG00000157388 | CACNA1D  |
| ENSG00000022840 | RNF10    |
| ENSG00000183283 | DAZAP2   |
| ENSG00000182670 | TTC3     |
| ENSG00000271601 | LIX1L    |
| ENSG00000153956 | CACNA2D1 |
| ENSG00000105270 | CLIP3    |
| ENSG00000145901 | TNIP1    |
| ENSG00000165097 | KDM1B    |
| ENSG00000122376 | FAM35A   |
| ENSG00000198824 | CHAMP1   |
| ENSG00000178662 | CSRNP3   |
| ENSG00000136816 | TOR1B    |
| ENSG00000128829 | EIF2AK4  |
| ENSG00000065000 | AP3D1    |
| ENSG00000101911 | PRPS2    |
| ENSG00000111679 | PTPN6    |
| ENSG00000048471 | SNX29    |
| ENSG00000113845 | TIMMDC1  |
| ENSG00000169905 | TOR1AIP2 |
| ENSG00000159720 | ATP6V0D1 |

|                 |          |
|-----------------|----------|
| ENSG00000111540 | RAB5B    |
| ENSG00000135312 | HTR1B    |
| ENSG00000137177 | KIF13A   |
| ENSG00000104081 | BMF      |
| ENSG00000131374 | TBC1D5   |
| ENSG00000198492 | YTHDF2   |
| ENSG00000143418 | CERS2    |
| ENSG00000115539 | PDCL3    |
| ENSG00000145882 | PCYOX1L  |
| ENSG00000136352 | NKX2-1   |
| ENSG00000177981 | ASB8     |
| ENSG00000198786 | MT-ND5   |
| ENSG00000163820 | FYCO1    |
| ENSG00000101104 | PABPC1L  |
| ENSG00000112902 | SEMA5A   |
| ENSG00000171451 | DSEL     |
| ENSG00000160710 | ADAR     |
| ENSG00000110844 | PRPF40B  |
| ENSG00000103591 | AAGAB    |
| ENSG00000176046 | NUPR1    |
| ENSG0000011465  | DCN      |
| ENSG00000130956 | HABP4    |
| ENSG00000121064 | SCPEP1   |
| ENSG00000104490 | NCALD    |
| ENSG00000101752 | MIB1     |
| ENSG00000140319 | SRP14    |
| ENSG00000225830 | ERCC6    |
| ENSG00000137478 | FCHSD2   |
| ENSG00000124541 | RRP36    |
| ENSG00000163900 | TMEM41A  |
| ENSG00000177570 | SAMD12   |
| ENSG00000137273 | FOXF2    |
| ENSG00000138660 | AP1AR    |
| ENSG00000223501 | VPS52    |
| ENSG00000075089 | ACTR6    |
| ENSG00000099250 | NRP1     |
| ENSG00000186470 | BTN3A2   |
| ENSG00000186834 | HEXIM1   |
| ENSG00000143641 | GALNT2   |
| ENSG00000121691 | CAT      |
| ENSG00000133872 | SARAF    |
| ENSG00000143375 | CGN      |
| ENSG00000162378 | ZYG11B   |
| ENSG00000108395 | TRIM37   |
| ENSG00000099282 | TSPAN15  |
| ENSG00000138326 | RPS24    |
| ENSG00000160685 | ZBTB7B   |
| ENSG00000140988 | RPS2     |
| ENSG00000220205 | VAMP2    |
| ENSG00000078018 | MAP2     |
| ENSG00000157168 | NRG1     |
| ENSG00000103222 | ABCC1    |
| ENSG00000196159 | FAT4     |
| ENSG00000175395 | ZNF25    |
| ENSG00000130349 | C6orf203 |
| ENSG00000176049 | JAKMIP2  |
| ENSG00000183401 | CCDC159  |
| ENSG00000064309 | CDON     |
| ENSG00000160007 | ARHGAP35 |
| ENSG00000068366 | ACSL4    |
| ENSG00000108797 | CNTNAP1  |
| ENSG00000115325 | DOK1     |

|                 |         |
|-----------------|---------|
| ENSG00000143409 | MINDY1  |
| ENSG00000185345 | PRKN    |
| ENSG00000138685 | FGF2    |
| ENSG00000165609 | NUDT5   |
| ENSG00000103042 | SLC38A7 |
| ENSG00000164442 | CITED2  |
| ENSG00000143248 | RGS5    |
| ENSG00000148303 | RPL7A   |
| ENSG00000136444 | RSAD1   |
| ENSG00000057657 | PRDM1   |
| ENSG00000126803 | HSPA2   |
| ENSG00000100605 | ITPK1   |
| ENSG00000168710 | AHCYL1  |
| ENSG00000170802 | FOXN2   |
| ENSG00000137203 | TFAP2A  |

List of DE pcRNAs (Down-regulated in LongTKD vs.NC but Up-regulated in ShortTKD vs. NC)

|                 | symbol  |
|-----------------|---------|
| ENSG00000168329 | CX3CR1  |
| ENSG00000112964 | GHR     |
| ENSG00000255690 | TRIL    |
| ENSG00000142149 | HUNK    |
| ENSG00000092964 | DPYSL2  |
| ENSG00000154928 | EPHB1   |
| ENSG00000169764 | UGP2    |
| ENSG00000058404 | CAMK2B  |
| ENSG00000088836 | SLC4A11 |
| ENSG00000122986 | HVCN1   |

List of DE miRNAs (LongTKD vs. NC)

|                  | logFC | PValue   | qvalue   |
|------------------|-------|----------|----------|
| hsa-let-7e-5p    | -1.25 | 4.92E-14 | 3.24E-11 |
| hsa-miR-137-3p   | -0.91 | 2.33E-05 | 7.69E-03 |
| hsa-miR-1290     | 0.94  | 4.83E-05 | 7.96E-03 |
| hsa-miR-1294     | -2.23 | 3.98E-05 | 7.96E-03 |
| hsa-miR-7-5p     | -0.74 | 1.01E-04 | 1.34E-02 |
| hsa-miR-25-5p    | -0.74 | 1.76E-04 | 1.93E-02 |
| hsa-miR-92a-2-5p | -2.75 | 2.30E-04 | 2.16E-02 |
| hsa-miR-106a-5p  | -0.71 | 5.41E-04 | 4.46E-02 |

List of DE miRNAs (ShortTKD vs. NC)

|                 | logFC | PValue   | qvalue   |
|-----------------|-------|----------|----------|
| hsa-miR-432-5p  | -1.19 | 2.60E-07 | 1.70E-04 |
| hsa-miR-374b-3p | 0.95  | 1.27E-06 | 4.16E-04 |
| hsa-miR-361-3p  | -0.93 | 2.20E-06 | 4.79E-04 |
| hsa-miR-137-3p  | -0.78 | 4.01E-05 | 6.56E-03 |

List of DE miRNA (Both Down-regulated)  
hsa-miR-137-3p



## GO analysis (LongTKD vs. NC)

| ONTOLOGY | ID         | GeneRatio | BgRatio   | pvalue   | qvalue   |
|----------|------------|-----------|-----------|----------|----------|
| BP       | GO:0000819 | 49/1364   | 249/19623 | 2.59E-11 | 1.26E-07 |
| BP       | GO:0007059 | 64/1364   | 383/19623 | 4.57E-11 | 1.26E-07 |
| BP       | GO:0007062 | 34/1364   | 141/19623 | 1.03E-10 | 1.90E-07 |
| BP       | GO:0098813 | 56/1364   | 333/19623 | 5.87E-10 | 8.08E-07 |
| BP       | GO:0006260 | 52/1364   | 310/19623 | 2.64E-09 | 2.91E-06 |
| BP       | GO:0006261 | 33/1364   | 154/19623 | 4.93E-09 | 4.53E-06 |
| BP       | GO:0000082 | 48/1364   | 295/19623 | 2.89E-08 | 2.11E-05 |
| BP       | GO:0044843 | 50/1364   | 314/19623 | 3.06E-08 | 2.11E-05 |
| BP       | GO:0006270 | 15/1364   | 43/19623  | 9.38E-08 | 5.74E-05 |
| BP       | GO:0140014 | 45/1364   | 291/19623 | 3.51E-07 | 1.93E-04 |
| BP       | GO:0000280 | 61/1364   | 453/19623 | 4.98E-07 | 2.49E-04 |
| BP       | GO:0034620 | 31/1364   | 172/19623 | 8.64E-07 | 3.96E-04 |
| BP       | GO:0030968 | 27/1364   | 139/19623 | 9.60E-07 | 4.07E-04 |
| BP       | GO:0006986 | 34/1364   | 202/19623 | 1.34E-06 | 5.27E-04 |
| BP       | GO:0000070 | 28/1364   | 155/19623 | 2.75E-06 | 1.01E-03 |
| BP       | GO:0034976 | 44/1364   | 305/19623 | 3.19E-06 | 1.02E-03 |
| BP       | GO:0022604 | 63/1364   | 500/19623 | 3.19E-06 | 1.02E-03 |
| BP       | GO:0035967 | 33/1364   | 201/19623 | 3.34E-06 | 1.02E-03 |
| BP       | GO:0070601 | 7/1364    | 12/19623  | 4.48E-06 | 1.30E-03 |
| BP       | GO:0010769 | 42/1364   | 290/19623 | 4.79E-06 | 1.32E-03 |
| BP       | GO:0035966 | 36/1364   | 233/19623 | 5.17E-06 | 1.35E-03 |
| BP       | GO:0034080 | 13/1364   | 44/19623  | 5.67E-06 | 1.36E-03 |
| BP       | GO:0061641 | 13/1364   | 44/19623  | 5.67E-06 | 1.36E-03 |
| BP       | GO:0001503 | 53/1364   | 404/19623 | 5.97E-06 | 1.37E-03 |
| BP       | GO:0031055 | 13/1364   | 46/19623  | 9.75E-06 | 1.98E-03 |
| BP       | GO:0000075 | 38/1364   | 259/19623 | 9.86E-06 | 1.98E-03 |
| BP       | GO:0031023 | 25/1364   | 139/19623 | 1.00E-05 | 1.98E-03 |
| BP       | GO:0048608 | 56/1364   | 443/19623 | 1.01E-05 | 1.98E-03 |
| BP       | GO:0010212 | 27/1364   | 157/19623 | 1.06E-05 | 2.02E-03 |
| BP       | GO:0061458 | 56/1364   | 446/19623 | 1.23E-05 | 2.26E-03 |
| BP       | GO:0090329 | 13/1364   | 49/19623  | 2.07E-05 | 3.67E-03 |
| BP       | GO:0000724 | 22/1364   | 119/19623 | 2.14E-05 | 3.69E-03 |
| BP       | GO:0000725 | 22/1364   | 120/19623 | 2.46E-05 | 3.98E-03 |
| BP       | GO:0048545 | 53/1364   | 425/19623 | 2.52E-05 | 3.98E-03 |
| BP       | GO:0007098 | 23/1364   | 129/19623 | 2.58E-05 | 3.98E-03 |
| BP       | GO:0034724 | 14/1364   | 57/19623  | 2.60E-05 | 3.98E-03 |
| BP       | GO:0010975 | 57/1364   | 470/19623 | 2.85E-05 | 4.24E-03 |
| BP       | GO:0060348 | 31/1364   | 205/19623 | 3.49E-05 | 5.03E-03 |
| BP       | GO:0007135 | 6/1364    | 11/19623  | 3.80E-05 | 5.03E-03 |
| BP       | GO:0061983 | 6/1364    | 11/19623  | 3.80E-05 | 5.03E-03 |
| BP       | GO:1902969 | 6/1364    | 11/19623  | 3.80E-05 | 5.03E-03 |
| BP       | GO:0043486 | 14/1364   | 59/19623  | 3.95E-05 | 5.03E-03 |
| BP       | GO:0010569 | 10/1364   | 32/19623  | 3.99E-05 | 5.03E-03 |
| BP       | GO:0031018 | 12/1364   | 45/19623  | 4.05E-05 | 5.03E-03 |
| BP       | GO:0033260 | 13/1364   | 52/19623  | 4.11E-05 | 5.03E-03 |
| BP       | GO:0021537 | 37/1364   | 268/19623 | 4.96E-05 | 5.94E-03 |
| BP       | GO:0051656 | 56/1364   | 470/19623 | 5.46E-05 | 6.40E-03 |
| BP       | GO:0030198 | 48/1364   | 384/19623 | 5.63E-05 | 6.45E-03 |
| BP       | GO:0044786 | 14/1364   | 61/19623  | 5.86E-05 | 6.59E-03 |
| BP       | GO:0051321 | 37/1364   | 272/19623 | 6.81E-05 | 7.50E-03 |
| BP       | GO:0000732 | 9/1364    | 28/19623  | 7.60E-05 | 7.88E-03 |
| BP       | GO:0018210 | 24/1364   | 147/19623 | 7.62E-05 | 7.88E-03 |
| BP       | GO:0031016 | 16/1364   | 78/19623  | 7.66E-05 | 7.88E-03 |
| BP       | GO:0034508 | 13/1364   | 55/19623  | 7.73E-05 | 7.88E-03 |
| BP       | GO:0031960 | 27/1364   | 176/19623 | 8.48E-05 | 8.49E-03 |
| BP       | GO:0006336 | 13/1364   | 56/19623  | 9.43E-05 | 9.27E-03 |
| BP       | GO:0010948 | 49/1364   | 404/19623 | 1.01E-04 | 9.75E-03 |
| BP       | GO:0010165 | 10/1364   | 36/19623  | 1.22E-04 | 1.16E-02 |
| BP       | GO:0070102 | 7/1364    | 18/19623  | 1.24E-04 | 1.16E-02 |
| BP       | GO:0031570 | 29/1364   | 200/19623 | 1.32E-04 | 1.17E-02 |

|    |            |         |           |          |          |
|----|------------|---------|-----------|----------|----------|
| BP | GO:0007088 | 26/1364 | 171/19623 | 1.32E-04 | 1.17E-02 |
| BP | GO:0035690 | 46/1364 | 376/19623 | 1.33E-04 | 1.17E-02 |
| BP | GO:0006302 | 33/1364 | 240/19623 | 1.34E-04 | 1.17E-02 |
| BP | GO:0071459 | 8/1364  | 24/19623  | 1.43E-04 | 1.23E-02 |
| BP | GO:0048193 | 47/1364 | 390/19623 | 1.61E-04 | 1.37E-02 |
| BP | GO:0036498 | 15/1364 | 75/19623  | 1.71E-04 | 1.41E-02 |
| BP | GO:0016051 | 32/1364 | 233/19623 | 1.72E-04 | 1.41E-02 |
| BP | GO:0001893 | 9/1364  | 31/19623  | 1.83E-04 | 1.49E-02 |
| BP | GO:0006338 | 28/1364 | 196/19623 | 2.20E-04 | 1.76E-02 |
| BP | GO:2000779 | 13/1364 | 61/19623  | 2.37E-04 | 1.86E-02 |
| BP | GO:0051052 | 50/1364 | 430/19623 | 2.42E-04 | 1.88E-02 |
| BP | GO:0070059 | 14/1364 | 70/19623  | 2.80E-04 | 2.13E-02 |
| BP | GO:0021543 | 27/1364 | 189/19623 | 2.83E-04 | 2.13E-02 |
| BP | GO:0030900 | 47/1364 | 401/19623 | 3.07E-04 | 2.22E-02 |
| BP | GO:1903046 | 29/1364 | 210/19623 | 3.08E-04 | 2.22E-02 |
| BP | GO:0071496 | 40/1364 | 325/19623 | 3.12E-04 | 2.22E-02 |
| BP | GO:0014066 | 19/1364 | 114/19623 | 3.13E-04 | 2.22E-02 |
| BP | GO:0031572 | 10/1364 | 40/19623  | 3.15E-04 | 2.22E-02 |
| BP | GO:0060349 | 16/1364 | 88/19623  | 3.34E-04 | 2.33E-02 |
| BP | GO:0048813 | 22/1364 | 143/19623 | 3.55E-04 | 2.45E-02 |
| BP | GO:0051056 | 44/1364 | 372/19623 | 3.87E-04 | 2.62E-02 |
| BP | GO:0030888 | 13/1364 | 64/19623  | 3.90E-04 | 2.62E-02 |
| BP | GO:0007093 | 27/1364 | 193/19623 | 3.97E-04 | 2.64E-02 |
| BP | GO:0001701 | 41/1364 | 340/19623 | 4.05E-04 | 2.65E-02 |
| BP | GO:0009314 | 53/1364 | 474/19623 | 4.19E-04 | 2.72E-02 |
| BP | GO:0048015 | 25/1364 | 174/19623 | 4.28E-04 | 2.74E-02 |
| BP | GO:0034446 | 16/1364 | 90/19623  | 4.35E-04 | 2.75E-02 |
| BP | GO:0046605 | 12/1364 | 57/19623  | 4.59E-04 | 2.84E-02 |
| BP | GO:0051783 | 27/1364 | 195/19623 | 4.68E-04 | 2.84E-02 |
| BP | GO:0140013 | 27/1364 | 195/19623 | 4.68E-04 | 2.84E-02 |
| BP | GO:0000083 | 8/1364  | 28/19623  | 4.72E-04 | 2.84E-02 |
| BP | GO:0034109 | 15/1364 | 82/19623  | 4.74E-04 | 2.84E-02 |
| BP | GO:0007548 | 35/1364 | 279/19623 | 5.07E-04 | 2.98E-02 |
| BP | GO:0021954 | 14/1364 | 74/19623  | 5.09E-04 | 2.98E-02 |
| BP | GO:0021987 | 20/1364 | 128/19623 | 5.27E-04 | 3.00E-02 |
| BP | GO:0060350 | 11/1364 | 50/19623  | 5.28E-04 | 3.00E-02 |
| BP | GO:0061971 | 11/1364 | 50/19623  | 5.28E-04 | 3.00E-02 |
| BP | GO:0051784 | 12/1364 | 58/19623  | 5.42E-04 | 3.02E-02 |
| BP | GO:0043044 | 15/1364 | 83/19623  | 5.42E-04 | 3.02E-02 |
| BP | GO:0048017 | 25/1364 | 177/19623 | 5.54E-04 | 3.05E-02 |
| BP | GO:0032355 | 20/1364 | 129/19623 | 5.84E-04 | 3.15E-02 |
| BP | GO:0035270 | 20/1364 | 129/19623 | 5.84E-04 | 3.15E-02 |
| BP | GO:0007409 | 53/1364 | 481/19623 | 5.93E-04 | 3.17E-02 |
| BP | GO:0001649 | 30/1364 | 229/19623 | 6.05E-04 | 3.20E-02 |
| BP | GO:0060135 | 12/1364 | 59/19623  | 6.38E-04 | 3.35E-02 |
| BP | GO:0007565 | 27/1364 | 199/19623 | 6.45E-04 | 3.35E-02 |
| BP | GO:0006310 | 35/1364 | 283/19623 | 6.58E-04 | 3.39E-02 |
| BP | GO:0015893 | 28/1364 | 210/19623 | 6.85E-04 | 3.49E-02 |
| BP | GO:0000077 | 26/1364 | 190/19623 | 7.07E-04 | 3.57E-02 |
| BP | GO:0031589 | 41/1364 | 350/19623 | 7.28E-04 | 3.65E-02 |
| BP | GO:0042542 | 21/1364 | 141/19623 | 7.42E-04 | 3.68E-02 |
| BP | GO:0006023 | 19/1364 | 123/19623 | 8.29E-04 | 4.07E-02 |
| BP | GO:0006024 | 18/1364 | 114/19623 | 8.65E-04 | 4.21E-02 |
| BP | GO:0070527 | 12/1364 | 61/19623  | 8.74E-04 | 4.22E-02 |
| BP | GO:0001570 | 14/1364 | 78/19623  | 8.81E-04 | 4.22E-02 |
| BP | GO:0071383 | 34/1364 | 277/19623 | 8.91E-04 | 4.23E-02 |
| BP | GO:0046661 | 23/1364 | 163/19623 | 9.17E-04 | 4.32E-02 |
| BP | GO:0043062 | 49/1364 | 445/19623 | 9.50E-04 | 4.44E-02 |
| BP | GO:0001837 | 21/1364 | 144/19623 | 9.79E-04 | 4.49E-02 |
| BP | GO:0014065 | 21/1364 | 144/19623 | 9.79E-04 | 4.49E-02 |
| BP | GO:0051650 | 32/1364 | 258/19623 | 1.04E-03 | 4.75E-02 |
| BP | GO:0044839 | 36/1364 | 302/19623 | 1.09E-03 | 4.92E-02 |

|    |            |         |           |          |          |
|----|------------|---------|-----------|----------|----------|
| BP | GO:0016358 | 30/1364 | 238/19623 | 1.14E-03 | 5.08E-02 |
| BP | GO:0048705 | 28/1364 | 217/19623 | 1.14E-03 | 5.08E-02 |
| BP | GO:0032526 | 18/1364 | 117/19623 | 1.18E-03 | 5.19E-02 |
| BP | GO:0032528 | 7/1364  | 25/19623  | 1.22E-03 | 5.32E-02 |
| BP | GO:0071897 | 28/1364 | 218/19623 | 1.23E-03 | 5.32E-02 |
| BP | GO:0051648 | 33/1364 | 272/19623 | 1.28E-03 | 5.48E-02 |
| BP | GO:0006855 | 14/1364 | 81/19623  | 1.29E-03 | 5.48E-02 |
| BP | GO:0060174 | 5/1364  | 13/19623  | 1.29E-03 | 5.48E-02 |
| BP | GO:0046777 | 31/1364 | 251/19623 | 1.33E-03 | 5.58E-02 |
| BP | GO:0006470 | 40/1364 | 350/19623 | 1.35E-03 | 5.59E-02 |
| BP | GO:0030282 | 17/1364 | 109/19623 | 1.37E-03 | 5.59E-02 |
| BP | GO:0006978 | 6/1364  | 19/19623  | 1.38E-03 | 5.59E-02 |
| BP | GO:0001764 | 21/1364 | 148/19623 | 1.40E-03 | 5.59E-02 |
| BP | GO:0009312 | 9/1364  | 40/19623  | 1.41E-03 | 5.59E-02 |
| BP | GO:0044706 | 29/1364 | 231/19623 | 1.45E-03 | 5.59E-02 |
| BP | GO:0046632 | 15/1364 | 91/19623  | 1.45E-03 | 5.59E-02 |
| BP | GO:0048709 | 15/1364 | 91/19623  | 1.45E-03 | 5.59E-02 |
| BP | GO:0060840 | 15/1364 | 91/19623  | 1.45E-03 | 5.59E-02 |
| BP | GO:0000086 | 34/1364 | 285/19623 | 1.46E-03 | 5.59E-02 |
| BP | GO:0034502 | 14/1364 | 82/19623  | 1.46E-03 | 5.59E-02 |
| BP | GO:0030071 | 10/1364 | 48/19623  | 1.46E-03 | 5.59E-02 |
| BP | GO:0045839 | 10/1364 | 48/19623  | 1.46E-03 | 5.59E-02 |
| BP | GO:0051384 | 22/1364 | 159/19623 | 1.52E-03 | 5.72E-02 |
| BP | GO:0071695 | 22/1364 | 159/19623 | 1.52E-03 | 5.72E-02 |
| BP | GO:0033047 | 12/1364 | 65/19623  | 1.56E-03 | 5.80E-02 |
| BP | GO:0001783 | 7/1364  | 26/19623  | 1.57E-03 | 5.80E-02 |
| BP | GO:0060706 | 7/1364  | 26/19623  | 1.57E-03 | 5.80E-02 |
| BP | GO:0051983 | 16/1364 | 101/19623 | 1.58E-03 | 5.80E-02 |
| BP | GO:0031668 | 31/1364 | 254/19623 | 1.61E-03 | 5.84E-02 |
| BP | GO:0045930 | 42/1364 | 376/19623 | 1.61E-03 | 5.84E-02 |
| BP | GO:1902099 | 10/1364 | 49/19623  | 1.72E-03 | 6.17E-02 |
| BP | GO:0007050 | 32/1364 | 266/19623 | 1.73E-03 | 6.17E-02 |
| BP | GO:1901988 | 34/1364 | 288/19623 | 1.74E-03 | 6.17E-02 |
| BP | GO:0010038 | 40/1364 | 355/19623 | 1.75E-03 | 6.18E-02 |
| BP | GO:0048638 | 39/1364 | 344/19623 | 1.78E-03 | 6.18E-02 |
| BP | GO:0001101 | 40/1364 | 356/19623 | 1.84E-03 | 6.18E-02 |
| BP | GO:0000018 | 13/1364 | 75/19623  | 1.85E-03 | 6.18E-02 |
| BP | GO:0014068 | 13/1364 | 75/19623  | 1.85E-03 | 6.18E-02 |
| BP | GO:0003323 | 6/1364  | 20/19623  | 1.85E-03 | 6.18E-02 |
| BP | GO:0018243 | 6/1364  | 20/19623  | 1.85E-03 | 6.18E-02 |
| BP | GO:0034501 | 6/1364  | 20/19623  | 1.85E-03 | 6.18E-02 |
| BP | GO:0042772 | 6/1364  | 20/19623  | 1.85E-03 | 6.18E-02 |
| BP | GO:0046697 | 6/1364  | 20/19623  | 1.85E-03 | 6.18E-02 |
| BP | GO:0014841 | 5/1364  | 14/19623  | 1.90E-03 | 6.21E-02 |
| BP | GO:0042711 | 5/1364  | 14/19623  | 1.90E-03 | 6.21E-02 |
| BP | GO:0071354 | 8/1364  | 34/19623  | 1.90E-03 | 6.21E-02 |
| BP | GO:0071214 | 37/1364 | 323/19623 | 1.92E-03 | 6.21E-02 |
| BP | GO:0104004 | 37/1364 | 323/19623 | 1.92E-03 | 6.21E-02 |
| BP | GO:0006282 | 16/1364 | 103/19623 | 1.95E-03 | 6.27E-02 |
| BP | GO:0009411 | 20/1364 | 142/19623 | 1.96E-03 | 6.28E-02 |
| BP | GO:0060560 | 29/1364 | 236/19623 | 2.01E-03 | 6.41E-02 |
| BP | GO:0033045 | 13/1364 | 76/19623  | 2.09E-03 | 6.61E-02 |
| BP | GO:1901990 | 50/1364 | 475/19623 | 2.22E-03 | 6.98E-02 |
| BP | GO:0008608 | 8/1364  | 35/19623  | 2.32E-03 | 7.12E-02 |
| BP | GO:0010573 | 8/1364  | 35/19623  | 2.32E-03 | 7.12E-02 |
| BP | GO:0010737 | 8/1364  | 35/19623  | 2.32E-03 | 7.12E-02 |
| BP | GO:1900101 | 8/1364  | 35/19623  | 2.32E-03 | 7.12E-02 |
| BP | GO:0000731 | 13/1364 | 77/19623  | 2.36E-03 | 7.19E-02 |
| BP | GO:0007091 | 10/1364 | 51/19623  | 2.36E-03 | 7.19E-02 |
| BP | GO:1901654 | 25/1364 | 196/19623 | 2.40E-03 | 7.19E-02 |
| BP | GO:0047496 | 9/1364  | 43/19623  | 2.41E-03 | 7.19E-02 |
| BP | GO:0018242 | 6/1364  | 21/19623  | 2.44E-03 | 7.19E-02 |

|    |            |         |           |          |          |
|----|------------|---------|-----------|----------|----------|
| BP | GO:0036499 | 6/1364  | 21/19623  | 2.44E-03 | 7.19E-02 |
| BP | GO:0030203 | 22/1364 | 165/19623 | 2.44E-03 | 7.19E-02 |
| BP | GO:1990138 | 22/1364 | 165/19623 | 2.44E-03 | 7.19E-02 |
| BP | GO:0001890 | 21/1364 | 155/19623 | 2.49E-03 | 7.29E-02 |
| BP | GO:0046683 | 19/1364 | 135/19623 | 2.53E-03 | 7.37E-02 |
| BP | GO:0050770 | 23/1364 | 176/19623 | 2.56E-03 | 7.43E-02 |
| BP | GO:0001824 | 13/1364 | 78/19623  | 2.65E-03 | 7.62E-02 |
| BP | GO:0014856 | 5/1364  | 15/19623  | 2.68E-03 | 7.62E-02 |
| BP | GO:0034349 | 5/1364  | 15/19623  | 2.68E-03 | 7.62E-02 |
| BP | GO:0060746 | 5/1364  | 15/19623  | 2.68E-03 | 7.62E-02 |
| BP | GO:2000241 | 20/1364 | 146/19623 | 2.73E-03 | 7.64E-02 |
| BP | GO:0035904 | 10/1364 | 52/19623  | 2.75E-03 | 7.64E-02 |
| BP | GO:0044784 | 10/1364 | 52/19623  | 2.75E-03 | 7.64E-02 |
| BP | GO:0061383 | 10/1364 | 52/19623  | 2.75E-03 | 7.64E-02 |
| BP | GO:0038084 | 8/1364  | 36/19623  | 2.80E-03 | 7.71E-02 |
| BP | GO:1902235 | 8/1364  | 36/19623  | 2.80E-03 | 7.71E-02 |
| BP | GO:0048814 | 14/1364 | 88/19623  | 2.90E-03 | 7.93E-02 |
| BP | GO:0071774 | 21/1364 | 157/19623 | 2.91E-03 | 7.93E-02 |
| BP | GO:0071260 | 13/1364 | 79/19623  | 2.98E-03 | 7.97E-02 |
| BP | GO:0044774 | 19/1364 | 137/19623 | 2.99E-03 | 7.97E-02 |
| BP | GO:0061351 | 19/1364 | 137/19623 | 2.99E-03 | 7.97E-02 |
| BP | GO:0035914 | 12/1364 | 70/19623  | 3.00E-03 | 7.97E-02 |
| BP | GO:0018107 | 18/1364 | 127/19623 | 3.00E-03 | 7.97E-02 |
| BP | GO:0007162 | 34/1364 | 298/19623 | 3.04E-03 | 8.06E-02 |
| BP | GO:0035282 | 15/1364 | 98/19623  | 3.07E-03 | 8.09E-02 |
| BP | GO:0018146 | 7/1364  | 29/19623  | 3.10E-03 | 8.14E-02 |
| BP | GO:0021895 | 6/1364  | 22/19623  | 3.16E-03 | 8.18E-02 |
| BP | GO:0051383 | 6/1364  | 22/19623  | 3.16E-03 | 8.18E-02 |
| BP | GO:0060487 | 6/1364  | 22/19623  | 3.16E-03 | 8.18E-02 |
| BP | GO:1903573 | 10/1364 | 53/19623  | 3.18E-03 | 8.18E-02 |
| BP | GO:1902806 | 26/1364 | 211/19623 | 3.21E-03 | 8.18E-02 |
| BP | GO:2001020 | 26/1364 | 211/19623 | 3.21E-03 | 8.18E-02 |
| BP | GO:0000079 | 14/1364 | 89/19623  | 3.22E-03 | 8.18E-02 |
| BP | GO:0007077 | 9/1364  | 45/19623  | 3.35E-03 | 8.40E-02 |
| BP | GO:0008207 | 8/1364  | 37/19623  | 3.36E-03 | 8.40E-02 |
| BP | GO:0016572 | 8/1364  | 37/19623  | 3.36E-03 | 8.40E-02 |
| BP | GO:0018209 | 37/1364 | 334/19623 | 3.40E-03 | 8.46E-02 |
| BP | GO:0010998 | 4/1364  | 10/19623  | 3.47E-03 | 8.54E-02 |
| BP | GO:0072386 | 4/1364  | 10/19623  | 3.47E-03 | 8.54E-02 |
| BP | GO:2000042 | 4/1364  | 10/19623  | 3.47E-03 | 8.54E-02 |
| BP | GO:0010811 | 16/1364 | 109/19623 | 3.50E-03 | 8.56E-02 |
| BP | GO:0070507 | 24/1364 | 191/19623 | 3.52E-03 | 8.56E-02 |
| BP | GO:0008584 | 19/1364 | 139/19623 | 3.53E-03 | 8.56E-02 |
| BP | GO:1903510 | 17/1364 | 119/19623 | 3.55E-03 | 8.57E-02 |
| BP | GO:0010965 | 10/1364 | 54/19623  | 3.66E-03 | 8.75E-02 |
| BP | GO:0001832 | 5/1364  | 16/19623  | 3.68E-03 | 8.75E-02 |
| BP | GO:1901991 | 31/1364 | 268/19623 | 3.68E-03 | 8.75E-02 |
| BP | GO:0007265 | 51/1364 | 499/19623 | 3.69E-03 | 8.75E-02 |
| BP | GO:0051591 | 15/1364 | 100/19623 | 3.74E-03 | 8.82E-02 |
| BP | GO:0044344 | 20/1364 | 150/19623 | 3.75E-03 | 8.82E-02 |
| BP | GO:0046546 | 19/1364 | 140/19623 | 3.82E-03 | 8.96E-02 |
| BP | GO:0006275 | 18/1364 | 130/19623 | 3.87E-03 | 8.98E-02 |
| BP | GO:0044773 | 18/1364 | 130/19623 | 3.87E-03 | 8.98E-02 |
| BP | GO:0006022 | 23/1364 | 182/19623 | 3.93E-03 | 9.08E-02 |
| BP | GO:0008089 | 8/1364  | 38/19623  | 4.00E-03 | 9.17E-02 |
| BP | GO:0070741 | 8/1364  | 38/19623  | 4.00E-03 | 9.17E-02 |
| BP | GO:2000045 | 24/1364 | 193/19623 | 4.02E-03 | 9.17E-02 |
| BP | GO:0060479 | 6/1364  | 23/19623  | 4.03E-03 | 9.17E-02 |
| BP | GO:0048771 | 23/1364 | 183/19623 | 4.20E-03 | 9.53E-02 |
| BP | GO:0046364 | 14/1364 | 92/19623  | 4.38E-03 | 9.90E-02 |
| BP | GO:0003007 | 29/1364 | 249/19623 | 4.41E-03 | 9.92E-02 |
| CC | GO:0000775 | 47/1414 | 208/20758 | 1.83E-13 | 1.19E-10 |

|    |            |         |           |          |          |
|----|------------|---------|-----------|----------|----------|
| CC | GO:0000793 | 47/1414 | 233/20758 | 1.37E-11 | 4.46E-09 |
| CC | GO:0000779 | 31/1414 | 124/20758 | 1.59E-10 | 3.45E-08 |
| CC | GO:0000776 | 32/1414 | 142/20758 | 1.39E-09 | 2.26E-07 |
| CC | GO:0000777 | 27/1414 | 111/20758 | 4.56E-09 | 5.93E-07 |
| CC | GO:0098687 | 57/1414 | 383/20758 | 2.01E-08 | 2.18E-06 |
| CC | GO:0005819 | 50/1414 | 343/20758 | 2.81E-07 | 2.62E-05 |
| CC | GO:0030117 | 21/1414 | 102/20758 | 4.26E-06 | 3.08E-04 |
| CC | GO:0048475 | 21/1414 | 102/20758 | 4.26E-06 | 3.08E-04 |
| CC | GO:0000940 | 7/1414  | 14/20758  | 1.50E-05 | 9.79E-04 |
| CC | GO:0005657 | 16/1414 | 71/20758  | 1.77E-05 | 1.05E-03 |
| CC | GO:0030120 | 14/1414 | 58/20758  | 2.57E-05 | 1.40E-03 |
| CC | GO:0000794 | 19/1414 | 105/20758 | 7.92E-05 | 3.96E-03 |
| CC | GO:0042383 | 22/1414 | 138/20758 | 1.60E-04 | 7.44E-03 |
| CC | GO:0000922 | 24/1414 | 158/20758 | 1.77E-04 | 7.50E-03 |
| CC | GO:0030127 | 6/1414  | 14/20758  | 1.84E-04 | 7.50E-03 |
| CC | GO:0030496 | 25/1414 | 171/20758 | 2.42E-04 | 9.27E-03 |
| CC | GO:0000780 | 7/1414  | 23/20758  | 6.23E-04 | 2.25E-02 |
| CC | GO:0033267 | 42/1414 | 367/20758 | 6.82E-04 | 2.34E-02 |
| CC | GO:0005614 | 5/1414  | 12/20758  | 7.69E-04 | 2.50E-02 |
| CC | GO:0005911 | 51/1414 | 479/20758 | 1.03E-03 | 3.21E-02 |
| CC | GO:0000778 | 5/1414  | 13/20758  | 1.18E-03 | 3.49E-02 |
| CC | GO:0016327 | 6/1414  | 20/20758  | 1.67E-03 | 4.73E-02 |
| CC | GO:0005876 | 11/1414 | 59/20758  | 1.90E-03 | 5.15E-02 |
| CC | GO:0005874 | 46/1414 | 443/20758 | 2.90E-03 | 7.54E-02 |

## GO analysis (ShortTKD vs. NC)

| ONTOLOGY | ID         | GeneRatio | BgRatio   | pvalue   | qvalue   |
|----------|------------|-----------|-----------|----------|----------|
| BP       | GO:1902751 | 8/584     | 27/19623  | 7.90E-07 | 3.66E-03 |
| BP       | GO:0010971 | 7/584     | 23/19623  | 3.23E-06 | 7.47E-03 |
| BP       | GO:0007265 | 34/584    | 499/19623 | 7.03E-06 | 1.09E-02 |
| BP       | GO:0040013 | 29/584    | 403/19623 | 1.20E-05 | 1.25E-02 |
| BP       | GO:1905477 | 14/584    | 120/19623 | 1.35E-05 | 1.25E-02 |
| BP       | GO:0051271 | 27/584    | 370/19623 | 1.87E-05 | 1.44E-02 |
| BP       | GO:2000146 | 25/584    | 338/19623 | 3.03E-05 | 2.00E-02 |
| BP       | GO:1905475 | 16/584    | 167/19623 | 4.05E-05 | 2.35E-02 |
| BP       | GO:0045787 | 28/584    | 413/19623 | 4.92E-05 | 2.53E-02 |
| BP       | GO:0070936 | 9/584     | 59/19623  | 5.74E-05 | 2.66E-02 |
| BP       | GO:0030900 | 27/584    | 401/19623 | 7.50E-05 | 2.68E-02 |
| BP       | GO:0000082 | 22/584    | 295/19623 | 7.94E-05 | 2.68E-02 |
| BP       | GO:0010975 | 30/584    | 470/19623 | 8.05E-05 | 2.68E-02 |
| BP       | GO:0060840 | 11/584    | 91/19623  | 8.10E-05 | 2.68E-02 |
| BP       | GO:0090068 | 22/584    | 298/19623 | 9.20E-05 | 2.74E-02 |
| BP       | GO:0007389 | 29/584    | 452/19623 | 9.64E-05 | 2.74E-02 |
| BP       | GO:0030336 | 23/584    | 322/19623 | 1.06E-04 | 2.74E-02 |
| BP       | GO:0030705 | 16/584    | 181/19623 | 1.06E-04 | 2.74E-02 |
| BP       | GO:0001654 | 25/584    | 372/19623 | 1.41E-04 | 3.07E-02 |
| BP       | GO:0006855 | 10/584    | 81/19623  | 1.42E-04 | 3.07E-02 |
| BP       | GO:0007350 | 5/584     | 18/19623  | 1.43E-04 | 3.07E-02 |
| BP       | GO:0000083 | 6/584     | 28/19623  | 1.46E-04 | 3.07E-02 |
| BP       | GO:0060401 | 15/584    | 169/19623 | 1.66E-04 | 3.33E-02 |
| BP       | GO:0072331 | 22/584    | 312/19623 | 1.78E-04 | 3.34E-02 |
| BP       | GO:1903829 | 25/584    | 378/19623 | 1.81E-04 | 3.34E-02 |
| BP       | GO:0036010 | 5/584     | 19/19623  | 1.89E-04 | 3.34E-02 |
| BP       | GO:0044843 | 22/584    | 314/19623 | 1.95E-04 | 3.34E-02 |
| BP       | GO:0060402 | 14/584    | 154/19623 | 2.11E-04 | 3.42E-02 |
| BP       | GO:0051302 | 15/584    | 173/19623 | 2.14E-04 | 3.42E-02 |
| BP       | GO:0032465 | 10/584    | 87/19623  | 2.58E-04 | 3.91E-02 |
| BP       | GO:0043010 | 22/584    | 322/19623 | 2.77E-04 | 3.91E-02 |
| BP       | GO:0051924 | 19/584    | 258/19623 | 2.80E-04 | 3.91E-02 |
| BP       | GO:1901796 | 16/584    | 198/19623 | 2.99E-04 | 3.91E-02 |
| BP       | GO:0042542 | 13/584    | 141/19623 | 3.07E-04 | 3.91E-02 |
| BP       | GO:0032482 | 9/584     | 73/19623  | 3.07E-04 | 3.91E-02 |
| BP       | GO:0003205 | 14/584    | 160/19623 | 3.14E-04 | 3.91E-02 |
| BP       | GO:0043393 | 17/584    | 219/19623 | 3.15E-04 | 3.91E-02 |
| BP       | GO:0045216 | 19/584    | 261/19623 | 3.24E-04 | 3.91E-02 |
| BP       | GO:0000910 | 15/584    | 180/19623 | 3.29E-04 | 3.91E-02 |
| BP       | GO:0021954 | 9/584     | 74/19623  | 3.40E-04 | 3.94E-02 |
| BP       | GO:1901989 | 10/584    | 93/19623  | 4.44E-04 | 5.00E-02 |
| BP       | GO:0034765 | 28/584    | 472/19623 | 4.54E-04 | 5.00E-02 |
| BP       | GO:0003002 | 23/584    | 358/19623 | 4.86E-04 | 5.08E-02 |
| BP       | GO:0021700 | 19/584    | 271/19623 | 5.17E-04 | 5.08E-02 |
| BP       | GO:0022604 | 29/584    | 500/19623 | 5.20E-04 | 5.08E-02 |
| BP       | GO:0010970 | 13/584    | 149/19623 | 5.23E-04 | 5.08E-02 |
| BP       | GO:0099111 | 13/584    | 149/19623 | 5.23E-04 | 5.08E-02 |
| BP       | GO:0001763 | 17/584    | 229/19623 | 5.27E-04 | 5.08E-02 |
| BP       | GO:1901992 | 9/584     | 79/19623  | 5.55E-04 | 5.25E-02 |
| BP       | GO:0000077 | 15/584    | 190/19623 | 5.84E-04 | 5.41E-02 |
| BP       | GO:0031571 | 9/584     | 80/19623  | 6.10E-04 | 5.43E-02 |
| BP       | GO:0044819 | 9/584     | 80/19623  | 6.10E-04 | 5.43E-02 |
| BP       | GO:0007162 | 20/584    | 298/19623 | 6.48E-04 | 5.48E-02 |
| BP       | GO:0044783 | 9/584     | 81/19623  | 6.68E-04 | 5.48E-02 |
| BP       | GO:1903169 | 13/584    | 153/19623 | 6.72E-04 | 5.48E-02 |
| BP       | GO:0010522 | 10/584    | 98/19623  | 6.75E-04 | 5.48E-02 |
| BP       | GO:0035282 | 10/584    | 98/19623  | 6.75E-04 | 5.48E-02 |
| BP       | GO:0007411 | 18/584    | 257/19623 | 7.27E-04 | 5.80E-02 |
| BP       | GO:0044839 | 20/584    | 302/19623 | 7.64E-04 | 5.84E-02 |
| BP       | GO:0097553 | 12/584    | 136/19623 | 7.67E-04 | 5.84E-02 |

|    |            |        |           |          |          |
|----|------------|--------|-----------|----------|----------|
| BP | GO:0061138 | 16/584 | 216/19623 | 7.78E-04 | 5.84E-02 |
| BP | GO:0043473 | 10/584 | 100/19623 | 7.91E-04 | 5.84E-02 |
| BP | GO:0097485 | 18/584 | 259/19623 | 7.95E-04 | 5.84E-02 |
| BP | GO:0016358 | 17/584 | 238/19623 | 8.12E-04 | 5.88E-02 |
| BP | GO:0035904 | 7/584  | 52/19623  | 8.35E-04 | 5.95E-02 |
| BP | GO:0031589 | 22/584 | 350/19623 | 8.53E-04 | 5.99E-02 |
| BP | GO:0010959 | 24/584 | 397/19623 | 8.74E-04 | 6.04E-02 |
| BP | GO:0021885 | 8/584  | 68/19623  | 9.02E-04 | 6.14E-02 |
| BP | GO:0000086 | 19/584 | 285/19623 | 9.48E-04 | 6.36E-02 |
| BP | GO:0031570 | 15/584 | 200/19623 | 9.90E-04 | 6.54E-02 |
| BP | GO:0003231 | 11/584 | 122/19623 | 1.05E-03 | 6.85E-02 |
| BP | GO:1901990 | 27/584 | 475/19623 | 1.08E-03 | 6.94E-02 |
| BP | GO:0009411 | 12/584 | 142/19623 | 1.12E-03 | 7.07E-02 |
| BP | GO:0051098 | 23/584 | 381/19623 | 1.13E-03 | 7.07E-02 |
| BP | GO:1990778 | 19/584 | 290/19623 | 1.16E-03 | 7.18E-02 |
| BP | GO:0045931 | 13/584 | 163/19623 | 1.21E-03 | 7.24E-02 |
| BP | GO:0006835 | 9/584  | 88/19623  | 1.22E-03 | 7.24E-02 |
| BP | GO:0048732 | 27/584 | 479/19623 | 1.22E-03 | 7.24E-02 |
| BP | GO:0021602 | 5/584  | 28/19623  | 1.28E-03 | 7.49E-02 |
| BP | GO:0043297 | 8/584  | 72/19623  | 1.32E-03 | 7.57E-02 |
| BP | GO:1901861 | 13/584 | 165/19623 | 1.35E-03 | 7.57E-02 |
| BP | GO:1990138 | 13/584 | 165/19623 | 1.35E-03 | 7.57E-02 |
| BP | GO:0048532 | 4/584  | 17/19623  | 1.36E-03 | 7.57E-02 |
| BP | GO:1904062 | 20/584 | 318/19623 | 1.43E-03 | 7.85E-02 |
| BP | GO:0006513 | 8/584  | 73/19623  | 1.44E-03 | 7.85E-02 |
| BP | GO:0016236 | 20/584 | 319/19623 | 1.49E-03 | 7.93E-02 |
| BP | GO:0048634 | 13/584 | 167/19623 | 1.51E-03 | 7.93E-02 |
| BP | GO:2000810 | 5/584  | 29/19623  | 1.51E-03 | 7.93E-02 |
| BP | GO:0003158 | 12/584 | 148/19623 | 1.60E-03 | 8.23E-02 |
| BP | GO:0000186 | 7/584  | 58/19623  | 1.61E-03 | 8.23E-02 |
| BP | GO:0032456 | 6/584  | 43/19623  | 1.62E-03 | 8.23E-02 |
| BP | GO:0016570 | 27/584 | 490/19623 | 1.69E-03 | 8.50E-02 |
| BP | GO:0034330 | 19/584 | 300/19623 | 1.72E-03 | 8.56E-02 |
| BP | GO:0045665 | 15/584 | 212/19623 | 1.77E-03 | 8.68E-02 |
| BP | GO:1904377 | 7/584  | 59/19623  | 1.78E-03 | 8.68E-02 |
| BP | GO:0060537 | 24/584 | 420/19623 | 1.86E-03 | 8.99E-02 |
| BP | GO:0072659 | 17/584 | 258/19623 | 1.95E-03 | 9.02E-02 |
| BP | GO:0031345 | 13/584 | 172/19623 | 1.96E-03 | 9.02E-02 |
| BP | GO:0034620 | 13/584 | 172/19623 | 1.96E-03 | 9.02E-02 |
| BP | GO:0006470 | 21/584 | 350/19623 | 1.96E-03 | 9.02E-02 |
| BP | GO:2000045 | 14/584 | 193/19623 | 1.97E-03 | 9.02E-02 |
| BP | GO:0045667 | 11/584 | 132/19623 | 1.99E-03 | 9.02E-02 |
| BP | GO:0000075 | 17/584 | 259/19623 | 2.03E-03 | 9.05E-02 |
| BP | GO:1900739 | 5/584  | 31/19623  | 2.05E-03 | 9.05E-02 |
| BP | GO:1900740 | 5/584  | 31/19623  | 2.05E-03 | 9.05E-02 |
| BP | GO:1904375 | 9/584  | 95/19623  | 2.09E-03 | 9.11E-02 |
| BP | GO:0015800 | 7/584  | 61/19623  | 2.16E-03 | 9.36E-02 |
| BP | GO:0021675 | 8/584  | 78/19623  | 2.21E-03 | 9.38E-02 |
| BP | GO:0051279 | 8/584  | 78/19623  | 2.21E-03 | 9.38E-02 |
| BP | GO:0032231 | 9/584  | 96/19623  | 2.24E-03 | 9.44E-02 |
| BP | GO:0048469 | 13/584 | 175/19623 | 2.29E-03 | 9.45E-02 |
| BP | GO:0070588 | 20/584 | 331/19623 | 2.29E-03 | 9.45E-02 |
| BP | GO:1902475 | 6/584  | 46/19623  | 2.31E-03 | 9.45E-02 |
| BP | GO:0070830 | 7/584  | 62/19623  | 2.38E-03 | 9.64E-02 |
| BP | GO:0072384 | 8/584  | 79/19623  | 2.39E-03 | 9.64E-02 |
| BP | GO:0009952 | 15/584 | 219/19623 | 2.42E-03 | 9.64E-02 |
| BP | GO:0006816 | 25/584 | 454/19623 | 2.49E-03 | 9.64E-02 |
| BP | GO:0032886 | 15/584 | 220/19623 | 2.53E-03 | 9.64E-02 |
| BP | GO:0007413 | 4/584  | 20/19623  | 2.57E-03 | 9.64E-02 |
| BP | GO:0106030 | 4/584  | 20/19623  | 2.57E-03 | 9.64E-02 |
| BP | GO:0048066 | 6/584  | 47/19623  | 2.58E-03 | 9.64E-02 |
| BP | GO:0034644 | 8/584  | 80/19623  | 2.59E-03 | 9.64E-02 |

|    |            |        |           |          |          |
|----|------------|--------|-----------|----------|----------|
| BP | GO:0000302 | 16/584 | 243/19623 | 2.63E-03 | 9.64E-02 |
| BP | GO:0061351 | 11/584 | 137/19623 | 2.66E-03 | 9.64E-02 |
| BP | GO:0010603 | 3/584  | 10/19623  | 2.69E-03 | 9.64E-02 |
| BP | GO:0018026 | 3/584  | 10/19623  | 2.69E-03 | 9.64E-02 |
| BP | GO:0060600 | 3/584  | 10/19623  | 2.69E-03 | 9.64E-02 |
| BP | GO:0072386 | 3/584  | 10/19623  | 2.69E-03 | 9.64E-02 |
| BP | GO:0090150 | 20/584 | 336/19623 | 2.72E-03 | 9.64E-02 |
| BP | GO:0010762 | 5/584  | 33/19623  | 2.73E-03 | 9.64E-02 |
| BP | GO:0051209 | 10/584 | 118/19623 | 2.77E-03 | 9.64E-02 |
| BP | GO:0051283 | 10/584 | 118/19623 | 2.77E-03 | 9.64E-02 |
| BP | GO:0010769 | 18/584 | 290/19623 | 2.79E-03 | 9.64E-02 |
| BP | GO:0001655 | 20/584 | 337/19623 | 2.82E-03 | 9.64E-02 |
| BP | GO:0032147 | 21/584 | 361/19623 | 2.83E-03 | 9.64E-02 |
| BP | GO:0035967 | 14/584 | 201/19623 | 2.86E-03 | 9.64E-02 |
| BP | GO:0021545 | 6/584  | 48/19623  | 2.87E-03 | 9.64E-02 |
| BP | GO:0034656 | 6/584  | 48/19623  | 2.87E-03 | 9.64E-02 |
| BP | GO:0008360 | 13/584 | 180/19623 | 2.92E-03 | 9.70E-02 |
| BP | GO:0051282 | 10/584 | 119/19623 | 2.95E-03 | 9.70E-02 |
| BP | GO:0006865 | 11/584 | 139/19623 | 2.98E-03 | 9.70E-02 |
| BP | GO:0030968 | 11/584 | 139/19623 | 2.98E-03 | 9.70E-02 |
| BP | GO:0006986 | 14/584 | 202/19623 | 3.00E-03 | 9.70E-02 |
| BP | GO:0015807 | 7/584  | 65/19623  | 3.12E-03 | 9.72E-02 |
| BP | GO:0022029 | 7/584  | 65/19623  | 3.12E-03 | 9.72E-02 |
| BP | GO:0050768 | 17/584 | 270/19623 | 3.12E-03 | 9.72E-02 |
| BP | GO:0001844 | 5/584  | 34/19623  | 3.13E-03 | 9.72E-02 |
| BP | GO:0050931 | 5/584  | 34/19623  | 3.13E-03 | 9.72E-02 |
| BP | GO:0006979 | 26/584 | 487/19623 | 3.13E-03 | 9.72E-02 |
| BP | GO:1902903 | 21/584 | 365/19623 | 3.22E-03 | 9.95E-02 |
| CC | GO:0044233 | 5/612  | 14/20758  | 3.52E-05 | 1.32E-02 |
| CC | GO:0030496 | 16/612 | 171/20758 | 4.86E-05 | 1.32E-02 |
| CC | GO:0005911 | 29/612 | 479/20758 | 2.24E-04 | 3.20E-02 |
| CC | GO:0044232 | 5/612  | 20/20758  | 2.35E-04 | 3.20E-02 |
| CC | GO:0016328 | 8/612  | 62/20758  | 4.54E-04 | 4.93E-02 |
| CC | GO:0032155 | 8/612  | 69/20758  | 9.37E-04 | 7.87E-02 |
| CC | GO:0031300 | 15/612 | 204/20758 | 1.11E-03 | 7.87E-02 |
| CC | GO:0032154 | 7/612  | 56/20758  | 1.24E-03 | 7.87E-02 |
| CC | GO:0043296 | 12/612 | 147/20758 | 1.40E-03 | 7.87E-02 |
| CC | GO:0005923 | 11/612 | 128/20758 | 1.45E-03 | 7.87E-02 |
| CC | GO:0070160 | 11/612 | 131/20758 | 1.74E-03 | 7.91E-02 |
| CC | GO:0097542 | 6/612  | 44/20758  | 1.74E-03 | 7.91E-02 |
| CC | GO:0010494 | 6/612  | 46/20758  | 2.20E-03 | 8.69E-02 |
| CC | GO:0030667 | 21/612 | 357/20758 | 2.24E-03 | 8.69E-02 |
| CC | GO:0005916 | 3/612  | 10/20758  | 2.62E-03 | 9.51E-02 |
| MF | GO:0019003 | 9/587  | 60/19443  | 7.34E-05 | 5.98E-02 |



KEGG analysis (LongTKD vs. NC)

| ID       | GeneRatio | BgRatio  | pvalue   | qvalue   |
|----------|-----------|----------|----------|----------|
| hsa04110 | 26/610    | 124/7852 | 2.28E-06 | 7.02E-04 |
| hsa04141 | 26/610    | 165/7852 | 3.83E-04 | 4.32E-02 |
| hsa04512 | 16/610    | 82/7852  | 4.78E-04 | 4.32E-02 |
| hsa04218 | 25/610    | 160/7852 | 5.61E-04 | 4.32E-02 |
| hsa03460 | 12/610    | 54/7852  | 7.17E-04 | 4.42E-02 |
| hsa04115 | 14/610    | 72/7852  | 1.10E-03 | 4.72E-02 |
| hsa05412 | 14/610    | 72/7852  | 1.10E-03 | 4.72E-02 |
| hsa05110 | 11/610    | 50/7852  | 1.29E-03 | 4.72E-02 |
| hsa04114 | 20/610    | 125/7852 | 1.45E-03 | 4.72E-02 |
| hsa04931 | 18/610    | 108/7852 | 1.53E-03 | 4.72E-02 |
| hsa05165 | 40/610    | 330/7852 | 2.99E-03 | 7.67E-02 |
| hsa04510 | 27/610    | 199/7852 | 2.99E-03 | 7.67E-02 |
| hsa04151 | 42/610    | 354/7852 | 3.53E-03 | 8.29E-02 |
| hsa04914 | 16/610    | 99/7852  | 3.77E-03 | 8.29E-02 |

KEGG analysis (ShortTKD vs. NC)

| ID       | GeneRatio | BgRatio  | pvalue   | qvalue   |
|----------|-----------|----------|----------|----------|
| hsa04012 | 12/285    | 85/7847  | 5.13E-05 | 1.41E-02 |
| hsa04530 | 17/285    | 170/7847 | 1.39E-04 | 1.91E-02 |
